# Supplementary material for: Impact of patient characteristics on efficacy and safety of once-weekly semaglutide versus dulaglutide: SUSTAIN 7 post hoc analyses
Source: PubMed Central journal article supplement — BMJ Open. 2020 Nov 16;10(11):e037883. doi: 10.1136/bmjopen-2020-037883 (PMC7670946; doi:10.1136/bmjopen-2020-037883), 2020-11-16
Supplement: bmjopen-2020-037883.draft_revisions.pdf [file bmjopen-2020-037883.draft_revisions.pdf]

# BMJ Open

BMJ Open is committed to open peer review. As part of this commitment we make the peer review history of every article we publish publicly available.

When an article is published we post the peer reviewers' comments and the authors' responses online. We also post the versions of the paper that were used during peer review. These are the versions that the peer review comments apply to.

The versions of the paper that follow are the versions that were submitted during the peer review process. They are not the versions of record or the final published versions. They should not be cited or distributed as the published version of this manuscript.

BMJ Open is an open access journal and the full, final, typeset and author-corrected version of record of the manuscript is available on our site with no access controls, subscription charges or pay-per-view fees (<http://bmjopen.bmj.com>).

If you have any questions on BMJ Open's open peer review process please email [info.bmjopen@bmj.com](mailto:info.bmjopen@bmj.com)

# BMJ Open

## Impact of patient characteristics on efficacy and safety of OW semaglutide vs dulaglutide: SUSTAIN 7 *post hoc* analyses

|                               |                                                                                                                                                                                                                                                                                                                                                                                                                                                              |
|-------------------------------|--------------------------------------------------------------------------------------------------------------------------------------------------------------------------------------------------------------------------------------------------------------------------------------------------------------------------------------------------------------------------------------------------------------------------------------------------------------|
| Journal:                      | <i>BMJ Open</i>                                                                                                                                                                                                                                                                                                                                                                                                                                              |
| Manuscript ID                 | bmjopen-2020-037883                                                                                                                                                                                                                                                                                                                                                                                                                                          |
| Article Type:                 | Original research                                                                                                                                                                                                                                                                                                                                                                                                                                            |
| Date Submitted by the Author: | 05-Mar-2020                                                                                                                                                                                                                                                                                                                                                                                                                                                  |
| Complete List of Authors:     | Pratley, Richard; AdventHealth Translational Research Institute for Metabolism and Diabetes<br>Aroda, Vanita ; Brigham and Women's Hospital<br>Catarig, Andrei-Mircea; Novo Nordisk A/S<br>Lingvay, Ildiko; University of Texas Southwestern Medical Center<br>Lüdemann, Jörg; diabetes-falkensee, Diabetes Centre and Centre for Clinical Studies<br>Yildirim, Emre; Novo Nordisk A/S<br>Viljoen, Adie; Borthwick Diabetes Research Centre, Lister Hospital |
| Keywords:                     | General diabetes < DIABETES & ENDOCRINOLOGY, Diabetes & endocrinology < INTERNAL MEDICINE, Clinical trials < THERAPEUTICS                                                                                                                                                                                                                                                                                                                                    |
|                               |                                                                                                                                                                                                                                                                                                                                                                                                                                                              |

SCHOLARONE™  
Manuscripts

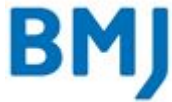

I, the Submitting Author has the right to grant and does grant on behalf of all authors of the Work (as defined in the below author licence), an exclusive licence and/or a non-exclusive licence for contributions from authors who are: i) UK Crown employees; ii) where BMJ has agreed a CC-BY licence shall apply, and/or iii) in accordance with the terms applicable for US Federal Government officers or employees acting as part of their official duties; on a worldwide, perpetual, irrevocable, royalty-free basis to BMJ Publishing Group Ltd ("BMJ") its licensees and where the relevant Journal is co-owned by BMJ to the co-owners of the Journal, to publish the Work in this journal and any other BMJ products and to exploit all rights, as set out in our [licence](#).

The Submitting Author accepts and understands that any supply made under these terms is made by BMJ to the Submitting Author unless you are acting as an employee on behalf of your employer or a postgraduate student of an affiliated institution which is paying any applicable article publishing charge ("APC") for Open Access articles. Where the Submitting Author wishes to make the Work available on an Open Access basis (and intends to pay the relevant APC), the terms of reuse of such Open Access shall be governed by a Creative Commons licence – details of these licences and which [Creative Commons](#) licence will apply to this Work are set out in our licence referred to above.

Other than as permitted in any relevant BMJ Author's Self Archiving Policies, I confirm this Work has not been accepted for publication elsewhere, is not being considered for publication elsewhere and does not duplicate material already published. I confirm all authors consent to publication of this Work and authorise the granting of this licence.

1  
2  
3  
4 1 **Title page**

5  
6 2 **Full title:** Impact of patient characteristics on efficacy and safety of OW semaglutide vs  
7  
8 3 dulaglutide: SUSTAIN 7 *post hoc* analyses  
9

10  
11 4  
12  
13 5 **Authors:** Pratley Richard E<sup>1</sup>, Aroda Vanita R<sup>2</sup>, Catarig Andrei M<sup>3</sup>, Lingvay Ildiko<sup>4</sup>,  
14  
15 6 Lüdemann Jörg<sup>5</sup>, Yildirim Emre<sup>3</sup>, Viljoen Adie<sup>6</sup>  
16

17  
18  
19  
20 8 **Author affiliations:**

21  
22 9 <sup>1</sup>AdventHealth Translational Research Institute for Metabolism and Diabetes, Orlando,  
23  
24 10 FL, USA; <sup>2</sup>Brigham and Women's Hospital, Boston, MA, USA; <sup>3</sup>Novo Nordisk A/S, Søborg,  
25  
26 11 Denmark; <sup>4</sup>University of Texas Southwestern Medical Center, Dallas, TX, USA; <sup>5</sup>diabetes-  
27  
28 12 falkensee, Diabetes Centre and Centre for Clinical Studies, Falkensee, Germany;  
29  
30 13 <sup>6</sup>Borthwick Diabetes Research Centre, Lister Hospital, Stevenage, UK  
31

32  
33 14  
34  
35 15 **Keywords:** type 2 diabetes, GLP-1, semaglutide, SUSTAIN, age, body mass index  
36  
37 16

38  
39  
40 17 **Contact details for corresponding author:**

41  
42 18 Dr Richard E. Pratley  
43  
44 19 AdventHealth Translational Research Institute for Metabolism and Diabetes  
45  
46 20 301 E. Princeton Street, Orlando, FL 32804, USA  
47  
48 21 Phone: +1-407-303-2519  
49  
50 22 E-mail: [Richard.Pratley.MD@AdventHealth.com](mailto:Richard.Pratley.MD@AdventHealth.com)  
51

52 23  
53  
54 24  
55  
56  
57  
58  
59  
60

**ABSTRACT**

**OBJECTIVE:** In SUSTAIN 7, once-weekly semaglutide demonstrated superior glycated haemoglobin (HbA<sub>1c</sub>) and body weight (BW) reductions vs once-weekly dulaglutide in subjects with type 2 diabetes (T2D). The aim of this *post hoc* analysis was to investigate the impact of clinically relevant subject characteristics on the treatment effects of semaglutide vs dulaglutide.

**DESIGN:** *Post hoc* analyses by baseline age (<65, ≥65 years), sex (male, female), diabetes duration (≤5, >5–10, >10 years), HbA<sub>1c</sub> (≤7.5, >7.5–8.5, >8.5% [≤58, >58–69, >69 mmol/mol]) and body mass index (BMI) (<30, 30–<35, ≥35 kg/m<sup>2</sup>).

**SETTING:** Conducted in 194 sites, across 16 countries.

**PARTICIPANTS:** Overall, 1,199 subjects with T2D were exposed to treatment and included in the analyses.

**INTERVENTIONS:** Semaglutide 0.5 mg vs dulaglutide 0.75 mg (low-dose comparison); semaglutide 1.0 mg vs dulaglutide 1.5 mg (high-dose comparison), all administered subcutaneously once weekly.

**PRIMARY AND SECONDARY OUTCOME MEASURES:** Change in HbA<sub>1c</sub> (primary endpoint) and BW (confirmatory secondary endpoint) from baseline to week 40; proportion of subjects achieving HbA<sub>1c</sub> targets (<7, ≤6.5% [<53, ≤48 mmol/mol]) and weight-loss responses (≥5%, ≥10%) at week 40; and safety were assessed.

**RESULTS:** HbA<sub>1c</sub> and BW reductions and proportion of subjects achieving HbA<sub>1c</sub> targets and weight-loss responses were greater with semaglutide vs dulaglutide and, excepting glycaemic control within the low-dose comparison in HbA<sub>1c</sub> subgroups, this was irrespective of subgroup or dose comparison analysed. Gastrointestinal adverse events, the most common with both treatments, were reported by more females than males and, with semaglutide, decreased with increasing BMI.

**CONCLUSIONS:** Consistently greater improvements in HbA<sub>1c</sub> and BW with semaglutide vs dulaglutide were observed, regardless of age, sex, diabetes duration, glycaemic control

1  
2  
3 52 and BMI; supporting the efficacy of semaglutide across the continuum of care in a  
4  
5 53 heterogeneous T2D population.  
6

7  
8 54 Clinical Trial Registration: NCT02648204 [ClinicalTrials.gov]  
9

10 55

11  
12  
13 56 **STRENGTHS AND LIMITATIONS OF THIS STUDY**

- 14  
15 57 • The analysis was designed to provide insight on the influence of five of the most  
16  
17 58 common and relevant patient-level factors from a clinical perspective  
18  
19 59 • The inclusion of comparator data allows for a more robust analysis and direct  
20  
21 60 comparison of the differences in efficacy and safety of semaglutide vs dulaglutide  
22  
23 61 across the subgroups and subgroup categories  
24  
25 62 • As the analysis is based on SUSTAIN 7 data alone, it may only be representative  
26  
27 63 of the trial-specific patient population  
28  
29 64 • The relatively small number of subjects in each subgroup category is a limitation  
30  
31 65 • As this is a *post hoc* analysis of a randomised clinical trial, there are inherent  
32  
33 66 limitations and, as such, the data should be interpreted with caution  
34  
35  
36  
37  
38  
39  
40  
41  
42  
43  
44  
45  
46  
47  
48  
49  
50  
51  
52  
53  
54  
55  
56  
57  
58  
59  
60

## 67 INTRODUCTION

68 The population of adults with type 2 diabetes (T2D) is heterogeneous, with varying  
69 clinical characteristics and comorbidities.(1) The importance of considering this  
70 heterogeneity when making treatment decisions is emphasised in guidelines on the  
71 management of T2D,(1-2) which recommend individualised patient-centred care  
72 considering the presence of comorbidities, including obesity, chronic kidney disease and  
73 cardiovascular disease.(2) Some studies have attempted to identify clusters of patients  
74 according to their clinical characteristics and risk of complications, in the hope this might  
75 enable treatment to be more precisely targeted to those who are likely to benefit  
76 most.(3) However, there is an ongoing debate about whether clustering or stratifying  
77 patients based on simple clinical characteristics is the most useful approach.(4,5)

78 Glucagon-like peptide-1 receptor agonists (GLP-1RAs) are an established treatment for  
79 T2D, recommended in current management guidelines.(1-2) The efficacy and safety of  
80 two once-weekly (OW) subcutaneous medications from the GLP-1RA class, semaglutide  
81 and dulaglutide, were respectively investigated in the global phase 3a SUSTAIN  
82 (Semaglutide Unabated Sustainability in Treatment of Type 2 Diabetes) (6-10) and  
83 AWARD (Assessment of Weekly Administration of LY2189265 in Diabetes) (11-20)  
84 clinical trial programmes. Both drugs have also been investigated in large-scale  
85 cardiovascular outcomes trials.(21,22) *Post hoc* analyses of the SUSTAIN and the  
86 AWARD trials have analysed patient subgroups across the continuum of T2D care.(23-  
87 35) Such analyses showed consistent, clinically relevant reductions in glycated  
88 haemoglobin (HbA<sub>1c</sub>) and body weight (BW) with semaglutide across patient subgroups  
89 based on characteristics including age, baseline body mass index (BMI), baseline HbA<sub>1c</sub>,  
90 diabetes duration, race and ethnicity.(23-26,28) Dulaglutide has also been shown to be  
91 efficacious across subgroups based on sex, age, duration of diabetes, beta-cell function,  
92 HbA<sub>1c</sub>, BW and BMI.(29-35)

93 In the phase 3b SUSTAIN 7 clinical trial, semaglutide and dulaglutide were compared  
94 head-to-head in subjects with T2D on background treatment with metformin.(36) The

1  
2  
3 95 trial showed superior reductions in HbA<sub>1c</sub> and BW with semaglutide vs dulaglutide, for  
4  
5 96 both low-dose (semaglutide 0.5 mg vs dulaglutide 0.75 mg) and high-dose (semaglutide  
6  
7 97 1.0 mg vs dulaglutide 1.5 mg) comparisons.(36) Although both semaglutide and  
8  
9 98 dulaglutide have individually demonstrated efficacy across multiple patient  
10  
11 99 subpopulations,(23-27,29-35) it is as yet unknown whether the treatment differences  
12  
13 100 observed in the SUSTAIN 7 trial are influenced by heterogeneity in the characteristics of  
14  
15 101 the patients with T2D.

16  
17  
18 102 To evaluate whether clinically relevant patient characteristics (age, sex, diabetes  
19  
20 103 duration, HbA<sub>1c</sub> and BMI at baseline) affected the efficacy and safety of semaglutide vs  
21  
22 104 dulaglutide, *post hoc* analyses of data from the SUSTAIN 7 trial were performed.  
23  
24  
25 105

## 26 27 106 **MATERIALS AND METHODS**

### 28 29 107 **Trial design**

30  
31  
32 108 The design of the SUSTAIN 7 trial has been previously reported.(36) Briefly, this was an  
33  
34 109 open-label trial in which subjects with uncontrolled T2D were randomised to receive  
35  
36 110 semaglutide OW 0.5 mg or 1.0 mg, or dulaglutide OW 0.75 mg or 1.5 mg, as add-on to  
37  
38 111 background treatment with metformin, and were followed throughout a 40-week  
39  
40 112 treatment period. Semaglutide was administered subcutaneously via a prefilled injection  
41  
42 113 device at one of two maintenance dose levels (0.5 mg or 1.0 mg OW), after following a  
43  
44 114 fixed-dose escalation regimen, as previously reported.(36) Dulaglutide was administered  
45  
46 115 subcutaneously in accordance with the regimen used in the phase 3 clinical trial  
47  
48 116 programme (0.75 mg or 1.5 mg OW), without dose escalation.(37)

49  
50  
51 117 The trial was registered with ClinicalTrials.gov (NCT02648204) and conducted in  
52  
53 118 accordance with the International Conference on Harmonisation Good Clinical Practice  
54  
55 119 guidelines and the Declaration of Helsinki. The trial protocol (see Supplement) was  
56  
57 120 approved by the institutional review boards and ethics committees at each participating  
58  
59  
60



1  
2  
3 121 centre and subjects provided written informed consent before trial-related activities  
4  
5 122 commenced.

### 8 123 **Patient and public involvement**

9  
10 124 The research question and endpoints, such as efficacy and safety, were informed  
11  
12 125 indirectly by patients' priorities, experiences and preferences, via input from clinicians  
13  
14 126 during advisory board meetings. No patients were involved directly in the design,  
15  
16 127 recruitment and conduct of the trial. Furthermore, the trial results were not directly  
17  
18 128 disseminated to trial patients, but were publicly communicated and available via press  
19  
20 129 release, trial portal and journal publication. In the trial, the burden of intervention was  
21  
22 130 not assessed by the patients, nor were there any patient advisers involved.

### 25 131 **Patient population**

26  
27 132 The inclusion and exclusion criteria for the SUSTAIN 7 trial are described in detail  
28  
29 133 elsewhere.<sup>(36)</sup> Key inclusion criteria were: diagnosis of T2D; age  $\geq 18$  years; HbA<sub>1c</sub>  
30  
31 134  $\geq 7.0$ – $10.5\%$  (53–91 mmol/mol). Key exclusion criteria were: estimated glomerular  
32  
33 135 filtration rate  $< 60$  mL/min/1.73 m<sup>2</sup>; history of chronic or idiopathic acute pancreatitis;  
34  
35 136 known proliferative retinopathy or maculopathy requiring acute treatment (determined  
36  
37 137 by fundoscopy/fundus photography performed within 90 days before randomisation  
38  
39 138 according to local practice); screening calcitonin value  $\geq 50$  ng/L; personal/family history  
40  
41 139 of medullary thyroid carcinoma or multiple endocrine neoplasia syndrome type 2; acute  
42  
43 140 coronary or cerebrovascular event within 90 days before randomisation; heart failure  
44  
45 141 (New York Heart Association Class IV); and any of the following: myocardial infarction,  
46  
47 142 stroke, or hospitalisation for unstable angina and/or transient ischaemic attack within  
48  
49 143 the past 180 days prior to screening.<sup>(36)</sup>

### 52 144 **Endpoints**

53  
54  
55 145 The primary endpoint was change in HbA<sub>1c</sub> (%-point) from baseline to end of treatment  
56  
57 146 at week 40 and the secondary confirmatory endpoint was change in BW (kg) over the  
58  
59 147 same period. Predefined clinical treatment targets were assessed; proportion of subjects  
60

1  
2  
3 148 achieving HbA<sub>1c</sub> targets of <7% (53 mmol/mol) and ≤6.5% (48 mmol/mol). The  
4  
5 149 proportion of subjects achieving weight-loss responses of ≥5% and ≥10% was also  
6  
7 150 assessed.  
8  
9

10 151 The numbers of adverse events (AEs), serious AEs and AEs leading to premature  
11  
12 152 treatment discontinuation were reported. Specific AEs of clinical interest, such as  
13  
14 153 gastrointestinal (GI) disorders and hypoglycaemic events, were also evaluated.  
15

### 16 154 **Subgroup analyses**

17  
18  
19 155 For this *post hoc* analysis, subjects were stratified into subgroups selected for potential  
20  
21 156 clinical relevance: age at baseline (<65 years, ≥65 years), sex (male, female), diabetes  
22  
23 157 duration at baseline (≤5 years, >5–10 years, >10 years), baseline HbA<sub>1c</sub> (≤7.5%, >7.5–  
24  
25 158 8.5%, >8.5% [≤58, >58–69, >69 mmol/mol]) and baseline BMI (<30 kg/m<sup>2</sup>,  
26  
27 159 30–<35 kg/m<sup>2</sup>, ≥35 kg/m<sup>2</sup>). The baseline BMI <25 kg/m<sup>2</sup> subgroup category was also  
28  
29 160 evaluated; however, due to the small number of subjects (representing less than 10% of  
30  
31 161 the total trial population), these data are not included in the Results, but are provided in  
32  
33 162 the Supplement.  
34

### 35 163 **Statistical analyses**

36  
37  
38 164 The efficacy analyses were based on the full analysis set, comprising all subjects  
39  
40 165 randomised and exposed to at least one dose of the trial product, using 'on-treatment  
41  
42 166 without rescue medication' data (as randomised). Analysis of covariance was performed  
43  
44 167 for each endpoint, including the interaction between treatment and subgroup as a factor.  
45  
46 168 Multiple imputation was used to account for missing data. Specifically, using a sequential  
47  
48 169 multiple-imputation approach, missing values for the underlying continuous assessments  
49  
50 170 were imputed by treatment group, assuming missing data were missing at random, and  
51  
52 171 based on a linear-regression model. A sequential conditional-regression approach was  
53  
54 172 applied whereby missing observations at any post-baseline visits were imputed based on  
55  
56 173 a linear-regression model and incorporating observations from previous visits including  
57  
58  
59  
60

1  
2  
3 174 baseline. Binary endpoints were created and logistic-regression models run on the  
4  
5 175 complete data set; inference was drawn using Rubin's rule.  
6  
7  
8 176 Values for the mean change from baseline for HbA<sub>1c</sub> and BW were calculated, and the  
9  
10 177 data are presented as mean and standard error. Estimated treatment differences (ETDs)  
11  
12 178 for the change from baseline in HbA<sub>1c</sub> and BW, and odds ratios (ORs) for the proportions  
13  
14 179 of subjects achieving HbA<sub>1c</sub> targets or weight-loss responses, both with 95% confidence  
15  
16 180 intervals, were also calculated for the low-dose (semaglutide 0.5 mg vs dulaglutide  
17  
18 181 0.75 mg) and high-dose (semaglutide 1.0 mg vs dulaglutide 1.5 mg) comparisons. To  
19  
20 182 evaluate the evidence of heterogeneity of treatment effects across the clinical  
21  
22 183 characteristics, a p-value for interaction between treatment effect and subgroup  
23  
24 184 categories was calculated for both dose comparisons in all subgroup analyses, without  
25  
26 185 adjustment for multiplicity.

27  
28 186 Safety analyses were based on the safety analysis set, which included all randomised  
29  
30 187 subjects who were exposed to at least one dose of trial product, based on 'as-treated'  
31  
32 188 data and summarised descriptively. Safety was assessed within each treatment arm  
33  
34 189 (semaglutide 0.5 mg, dulaglutide 0.75 mg, semaglutide 1.0 mg, dulaglutide 1.5 mg) in  
35  
36 190 each of the subgroup categories.

37  
38  
39 191 Baseline characteristics and AEs are provided as descriptive data only.  
40  
41  
42 192

## 43 44 193 **RESULTS**

### 45 46 194 **Subject disposition and baseline characteristics**

47  
48  
49 195 Baseline characteristics are summarised by treatment arm within each subgroup  
50  
51 196 category (**Tables 1 and 2; Supplementary Section I, Tables 1–3**). Subject  
52  
53 197 characteristics were generally comparable across subgroup categories with some  
54  
55 198 exceptions. In all treatment arms, diabetes duration was longer, and BW and BMI were  
56  
57 199 lower in the elderly ( $\geq 65$  years) subgroup compared with the non-elderly ( $< 65$  years)  
58  
59 200 subgroup (**Table 1**). Males were generally heavier but with a lower BMI, and had a  
60

1  
2  
3 201 longer diabetes duration than females (**Supplementary Table 1**). In the diabetes  
4  
5 202 duration subgroup categories ( $\leq 5$  years,  $>5$ – $10$  years,  $>10$  years), age increased with  
6  
7 203 increasing diabetes duration and, in the semaglutide 1.0 mg treatment arm, BW and BMI  
8  
9 204 decreased with increasing diabetes duration (**Supplementary Table 2**). Across the  
10  
11 205 baseline HbA<sub>1c</sub> subgroups ( $\leq 7.5\%$ ,  $>7.5$ – $8.5$ ,  $>8.5\%$  [ $\leq 58$ ,  $>58$ – $69$ ,  $>69$  mmol/mol]),  
12  
13 206 subjects in the semaglutide 0.5 mg treatment arm exhibited decreasing BW and BMI  
14  
15 207 with increasing HbA<sub>1c</sub> (**Supplementary Table 3**). In keeping with the distribution of  
16  
17 208 subjects in the sex subgroup categories, there was a greater proportion of females vs  
18  
19 209 males in the two highest BMI subgroups, and the proportion of Asian subjects was higher  
20  
21 210 in the subgroup with the lowest BMI vs the subgroup with the highest BMI (**Table 2**).  
22  
23 211 When compared with the other BMI subgroup categories, subjects with BMI  $<25$  kg/m<sup>2</sup>  
24  
25 212 had the highest HbA<sub>1c</sub> levels, the highest proportions of male and Asian subjects and, as  
26  
27 213 expected, the lowest BW (**Supplementary Table 4**).  
28  
29  
30  
31  
32  
33  
34  
35  
36  
37  
38  
39  
40  
41  
42  
43  
44  
45  
46  
47  
48  
49  
50  
51  
52  
53  
54  
55  
56  
57  
58  
59  
60

214 **Table 1. Subject demographics and baseline characteristics by age**

|                            |              | <65 years   |              |             |             | ≥65 years   |              |             |             |
|----------------------------|--------------|-------------|--------------|-------------|-------------|-------------|--------------|-------------|-------------|
|                            | All subjects | Sema 0.5 mg | Dula 0.75 mg | Sema 1.0 mg | Dula 1.5 mg | Sema 0.5 mg | Dula 0.75 mg | Sema 1.0 mg | Dula 1.5 mg |
| <b>n</b>                   | <b>1,199</b> | <b>222</b>  | <b>238</b>   | <b>247</b>  | <b>232</b>  | <b>79</b>   | <b>61</b>    | <b>53</b>   | <b>67</b>   |
| Age, years                 | 56 (10.6)    | 51.6 (8.4)  | 51.7 (8.3)   | 52.4 (9.0)  | 52.0 (8.5)  | 69.4 (4.4)  | 69.1 (3.9)   | 69.3 (4.2)  | 69.4 (3.9)  |
| Sex, n (%)                 |              |             |              |             |             |             |              |             |             |
| Male                       | 662 (55.2)   | 119 (53.6)  | 131 (55.0)   | 132 (53.4)  | 130 (56.0)  | 50 (63.3)   | 29 (47.5)    | 30 (56.6)   | 41 (61.2)   |
| Female                     | 537 (44.8)   | 103 (46.4)  | 107 (45.0)   | 115 (46.6)  | 102 (44.0)  | 29 (36.7)   | 32 (52.5)    | 23 (43.4)   | 26 (38.8)   |
| Diabetes duration, years   | 7.4 (5.7)    | 6.8 (5.4)   | 6.3 (5.2)    | 6.6 (5.3)   | 6.9 (5.2)   | 10.2 (6.7)  | 9.8 (5.9)    | 10.2 (6.6)  | 10.3 (6.3)  |
| HbA <sub>1c</sub> %        | 8.2 (0.9)    | 8.4 (1.0)   | 8.2 (0.9)    | 8.3 (0.9)   | 8.3 (0.9)   | 8.1 (0.9)   | 8.0 (0.8)    | 7.9 (0.8)   | 8.0 (0.8)   |
| HbA <sub>1c</sub> mmol/mol | 66.4 (10.0)  | 68.2 (10.7) | 66.2 (10.1)  | 66.9 (10.1) | 66.7 (9.9)  | 65.4 (9.7)  | 63.6 (9.0)   | 62.8 (9.2)  | 64.1 (8.7)  |
| Body weight, kg            | 95.2(22.6)   | 97.8 (25.6) | 96.5 (23.6)  | 97.2 (20.7) | 94.3 (23.2) | 92.4 (20.1) | 92.1 (20.4)  | 87.4 (20.2) | 90.2 (15.8) |
| BMI, kg/m <sup>2</sup>     | 33.5 (6.8)   | 34.4 (7.7)  | 34.0 (7.1)   | 34.2 (6.6)  | 33.4 (6.9)  | 31.7 (4.5)  | 32.4 (5.9)   | 30.9 (5.1)  | 32.1 (5.4)  |
| Race, n (%)                |              |             |              |             |             |             |              |             |             |
| Asian                      | 191 (15.9)   | 44 (19.8)   | 45 (18.9)    | 34 (13.8)   | 52 (22.4)   | 6 (7.6)     | 3 (4.9)      | 4 (7.5)     | 3 (4.5)     |
| Black/African American     | 70 (5.8)     | 13 (5.9)    | 13 (5.5)     | 14 (5.7)    | 16 (6.9)    | 4 (5.1)     | 4 (6.6)      | 4 (7.5)     | 2 (3.0)     |
| White                      | 928 (77.4)   | 164 (73.9)  | 178 (74.8)   | 198 (80.2)  | 158 (68.1)  | 69 (87.3)   | 54 (88.5)    | 45 (84.9)   | 62 (92.5)   |
| Other                      | 10 (0.8)     | 1 (0.5)     | 2 (0.8)      | 1 (0.4)     | 6 (2.6)     | 0           | 0            | 0           | 0           |
| Ethnic group, n (%)        |              |             |              |             |             |             |              |             |             |
| Hispanic/Latino            | 138 (11.5)   | 23 (10.4)   | 30 (12.6)    | 30 (12.1)   | 38 (16.4)   | 6 (7.6)     | 1 (1.6)      | 5 (9.4)     | 5 (7.5)     |
| Non-Hispanic/Latino        | 1,061 (88.5) | 199 (89.6)  | 208 (87.4)   | 217 (87.9)  | 194 (83.6)  | 73 (92.4)   | 60 (98.4)    | 48 (90.6)   | 62 (92.5)   |

215 'On-treatment without rescue medication' data. Subgroup data are presented as mean (standard deviation) unless otherwise indicated. BMI, body mass index; Dula,  
 216 dulaglutide; HbA<sub>1c</sub>, glycated haemoglobin; n, number of subjects randomised and exposed to at least one dose of trial product as randomised (full analysis set); Sema,  
 217 semaglutide.

218 **Table 2. Subject demographics and baseline characteristics by baseline BMI**

|                            |                | <30 kg/m <sup>2</sup> |                 |                |                | 30–<35 kg/m <sup>2</sup> |                 |                |                | ≥35 kg/m <sup>2</sup> |                 |                 |                 |
|----------------------------|----------------|-----------------------|-----------------|----------------|----------------|--------------------------|-----------------|----------------|----------------|-----------------------|-----------------|-----------------|-----------------|
|                            | All subjects   | Sema<br>0.5 mg        | Dula<br>0.75 mg | Sema<br>1.0 mg | Dula<br>1.5 mg | Sema<br>0.5 mg           | Dula<br>0.75 mg | Sema<br>1.0 mg | Dula<br>1.5 mg | Sema<br>0.5 mg        | Dula<br>0.75 mg | Sema<br>1.0 mg  | Dula<br>1.5 mg  |
| <b>n</b>                   | <b>1,199</b>   | <b>99</b>             | <b>100</b>      | <b>91</b>      | <b>109</b>     | <b>90</b>                | <b>86</b>       | <b>105</b>     | <b>81</b>      | <b>112</b>            | <b>113</b>      | <b>104</b>      | <b>108</b>      |
| Age, years                 | 56<br>(10.6)   | 57.4<br>(11.2)        | 56.0<br>(11.4)  | 57.5<br>(10.4) | 56.9<br>(10.5) | 58.7<br>(10.1)           | 55.3<br>(9.6)   | 54.4<br>(11.8) | 57.9<br>(10.7) | 53.3<br>(10.7)        | 54.5<br>(10.0)  | 54.6<br>(9.3)   | 53.5<br>(10.4)  |
| Sex, n (%)                 |                |                       |                 |                |                |                          |                 |                |                |                       |                 |                 |                 |
| Male                       | 662<br>(55.2)  | 57<br>(57.6)          | 60<br>(60.0)    | 56<br>(61.5)   | 71<br>(65.1)   | 53<br>(58.9)             | 44<br>(51.2)    | 62<br>(59.0)   | 47<br>(58.0)   | 59<br>(52.7)          | 56<br>(49.6)    | 44<br>(42.3)    | 52<br>(48.1)    |
| Female                     | 537<br>(44.8)  | 42<br>(42.4)          | 40<br>(40.0)    | 35<br>(38.5)   | 38<br>(34.9)   | 37<br>(41.1)             | 42<br>(48.8)    | 43<br>(41.0)   | 34<br>(42.0)   | 53<br>(47.3)          | 57<br>(50.4)    | 60<br>(57.7)    | 56<br>(51.9)    |
| Diabetes duration, years   | 7.4<br>(5.7)   | 8.0<br>(6.9)          | 8.0<br>(6.3)    | 9.0<br>(6.9)   | 7.3<br>(5.8)   | 7.5<br>(5.1)             | 6.2<br>(4.6)    | 7.0<br>(4.9)   | 7.9<br>(5.7)   | 7.7<br>(5.6)          | 6.7<br>(5.3)    | 6.0<br>(4.8)    | 7.8<br>(5.5)    |
| HbA <sub>1c</sub> %        | 8.2<br>(0.9)   | 8.4<br>(1.0)          | 8.2<br>(0.9)    | 8.3<br>(1.0)   | 8.1<br>(0.9)   | 8.2<br>(1.0)             | 8.2<br>(1.0)    | 8.1<br>(0.8)   | 8.2<br>(0.8)   | 8.3<br>(0.9)          | 8.1<br>(0.9)    | 8.2<br>(0.9)    | 8.3<br>(0.9)    |
| HbA <sub>1c</sub> mmol/mol | 66.4<br>(10.0) | 68.6<br>(10.9)        | 65.7 (9.6)      | 66.9<br>(10.8) | 65.5 (9.8)     | 66.2<br>(10.6)           | 66.4<br>(10.8)  | 65.5 (9.1)     | 65.9 (8.7)     | 67.4 (9.9)            | 65.1 (9.6)      | 66.3<br>(10.3)  | 66.9<br>(10.3)  |
| Body weight, kg            | 95.2<br>(22.6) | 73.8<br>(12.4)        | 75.1<br>(12.4)  | 78.4<br>(13.0) | 74.7<br>(12.6) | 94.1<br>(12.6)           | 91.8<br>(11.6)  | 92.8<br>(12.3) | 93.5<br>(11.3) | 118.2<br>(20.1)       | 116.8<br>(18.2) | 113.2<br>(19.7) | 112.3<br>(18.5) |
| BMI, kg/m <sup>2</sup>     | 33.5<br>(6.8)  | 26.5<br>(2.5)         | 26.8<br>(2.3)   | 27.2<br>(2.2)  | 26.7<br>(2.5)  | 32.6<br>(1.4)            | 32.3<br>(1.4)   | 32.4<br>(1.5)  | 32.7<br>(1.5)  | 40.9<br>(5.5)         | 40.7<br>(5.1)   | 40.5<br>(5.5)   | 39.8<br>(4.9)   |
| Race, n (%)                |                |                       |                 |                |                |                          |                 |                |                |                       |                 |                 |                 |
| Asian                      | 191<br>(15.9)  | 37<br>(37.4)          | 31<br>(31.0)    | 23<br>(25.3)   | 41<br>(37.6)   | 9<br>(10.0)              | 14<br>(16.3)    | 13<br>(12.4)   | 7<br>(8.6)     | 4<br>(3.6)            | 3<br>(2.7)      | 2<br>(1.9)      | 6<br>(5.6)      |
| Black/African American     | 70<br>(5.8)    | 2<br>(2.0)            | 7<br>(7.0)      | 9<br>(9.9)     | 4<br>(3.7)     | 5<br>(5.6)               | 3<br>(3.5)      | 5<br>(4.8)     | 6<br>(7.4)     | 10<br>(8.9)           | 7<br>(6.2)      | 4<br>(3.8)      | 8<br>(7.4)      |
| White                      | 928<br>(77.4)  | 60<br>(60.6)          | 62<br>(62.0)    | 59<br>(64.8)   | 63<br>(57.8)   | 76<br>(84.4)             | 69<br>(80.2)    | 87<br>(82.9)   | 67<br>(82.7)   | 97<br>(86.6)          | 101<br>(89.4)   | 97<br>(93.3)    | 90<br>(83.3)    |

|                     |                 |              |              |              |              |              |              |              |              |               |               |              |              |
|---------------------|-----------------|--------------|--------------|--------------|--------------|--------------|--------------|--------------|--------------|---------------|---------------|--------------|--------------|
| Other               | 10<br>(0.8)     | 0            | 0            | 0            | 1<br>(0.9)   | 0            | 0            | 0            | 1<br>(1.2)   | 1<br>(0.9)    | 2<br>(1.8)    | 1<br>(1.0)   | 4<br>(3.7)   |
| Ethnic group, n (%) |                 |              |              |              |              |              |              |              |              |               |               |              |              |
| Hispanic/Latino     | 138<br>(11.5)   | 8<br>(8.1)   | 15<br>(15.0) | 13<br>(14.3) | 18<br>(16.5) | 10<br>(11.1) | 7<br>(8.1)   | 13<br>(12.4) | 11<br>(13.6) | 11<br>(9.8)   | 9<br>(8.0)    | 9<br>(8.7)   | 14<br>(13.0) |
| Non-Hispanic/Latino | 1,061<br>(88.5) | 91<br>(91.9) | 85<br>(85.0) | 78<br>(85.7) | 91<br>(83.5) | 80<br>(88.9) | 79<br>(91.9) | 92<br>(87.6) | 70<br>(86.4) | 101<br>(90.2) | 104<br>(92.0) | 95<br>(91.3) | 94<br>(87.0) |

219 'On-treatment without rescue medication' data. Subgroup data are presented as mean (standard deviation) unless otherwise indicated. BMI, body mass index; Dula,  
 220 dulaglutide; HbA<sub>1c</sub>, glycated haemoglobin; n, number of subjects randomised and exposed to at least one dose of trial product as randomised (full analysis set); Sema,  
 221 semaglutide.

## 222 **Glycaemic control and body weight changes**

223 Overall, the mean changes from baseline in HbA<sub>1c</sub> and BW (**Supplementary Section II,**  
224 **Figure 1**) and the proportions of subjects achieving HbA<sub>1c</sub> targets of <7% (53  
225 mmol/mol) and ≤6.5% (48 mmol/mol) and weight-loss responses of ≥5% and ≥10%  
226 (**Supplementary Section II, Figures 2 and 3**) were of greater magnitude with  
227 semaglutide vs dulaglutide treatment. This observation was confirmed by the ETDs for  
228 change from baseline (**Figure 1**) and the ORs for proportions of subjects  
229 (**Supplementary Section II, Figures 4 and 5**) which significantly favoured  
230 semaglutide in the majority of both the low-dose and high-dose comparisons within each  
231 subgroup category.

232 For the individual analyses by subgroup, the findings were as follows:

233 Age at baseline (<65 years, ≥65 years): the proportion of elderly vs non-elderly subjects  
234 achieving glycaemic targets and weight-loss response of ≥5% was consistently higher  
235 with both semaglutide and dulaglutide (**Supplementary Figure 2A and B, and 3A**),  
236 despite elderly subjects having a lower baseline HbA<sub>1c</sub> and BMI than non-elderly subjects  
237 (**Table 1**). Proportions of subjects achieving ≥10% weight loss were comparable  
238 between the two age subgroups for both treatment arms (**Supplementary Figure 3B**).

239 Sex (male, female): Reductions in HbA<sub>1c</sub> and BW were generally greater in female than  
240 in male subjects (**Supplementary Figure 1C and D**), as was baseline BMI  
241 (**Supplementary Table 1**). This was reflected in the correspondingly greater  
242 proportions of female vs male subjects achieving the glycaemic targets and weight-loss  
243 responses (**Supplementary Figure 2C and D, and 3C and D**).

244 Diabetes duration at baseline (≤5 years, >5–10 years, >10 years): comparatively  
245 smaller reductions in HbA<sub>1c</sub> and BW were observed with semaglutide 1.0 mg in subjects  
246 with diabetes duration of >10 years vs ≤10 years, with no apparent differences observed  
247 in the other treatment arms (**Supplementary Figure 1E and F**). A similar pattern was  
248 observed for the proportions of subjects achieving glycaemic targets and weight-loss



1  
2  
3 249 responses in the semaglutide 1.0 mg treatment group (**Supplementary Figure 2E and**  
4  
5 250 **F, and 3E and F**).

6  
7  
8 251 Baseline HbA<sub>1c</sub> (<7.5%, >7.5–8.5%, >8.5% [ $\leq 58$ , >58–69, >69 mmol/mol]): with

9  
10 252 semaglutide 0.5 mg, and to a greater degree with semaglutide 1.0 mg, the magnitude of  
11  
12 253 the mean reduction in HbA<sub>1c</sub> from baseline increased with increasing baseline HbA<sub>1c</sub>; the  
13  
14 254 converse was apparent for BW, whereby the amount of weight lost was less with  
15  
16 255 increasing baseline HbA<sub>1c</sub> (**Supplementary Figure 1G and H**). A similar though less  
17  
18 256 apparent pattern was observed with dulaglutide, (**Supplementary Figure 1G and H**),  
19  
20 257 and this was reflected in the proportions of subjects achieving glycaemic targets  
21  
22 258 (**Supplementary Figure 2G and H**). Across baseline HbA<sub>1c</sub> subgroups, the greatest  
23  
24 259 proportion of subjects achieving  $\geq 5\%$  weight loss was observed in those subjects  
25  
26 260 receiving semaglutide 1.0 mg, particularly in the HbA<sub>1c</sub> subgroup categories of  $\leq 7.5\%$   
27  
28 261 (58 mmol/mol) and >7.5–8.5% (58–69 mmol/mol) (**Supplementary Figure 3G**). There  
29  
30 262 were no other apparent differences across the subgroup categories regarding the  
31  
32 263 proportions of subjects achieving weight-loss responses (**Supplementary Figure 3G**  
33  
34 264 **and H**).

35  
36 265 Baseline BMI (<30 kg/m<sup>2</sup>, 30–<35 kg/m<sup>2</sup>,  $\geq 35$  kg/m<sup>2</sup>): mean reductions in BW for both

37  
38 266 semaglutide and dulaglutide increased with increasing baseline BMI, with the greatest  
39  
40 267 reductions in the  $\geq 35$  kg/m<sup>2</sup> BMI subgroup category for all treatment arms  
41  
42 268 (**Supplementary Figure 1J**). There were no apparent trends in other BW or glycaemic  
43  
44 269 outcomes across the BMI categories for either dose comparison (**Supplementary**  
45  
46 270 **Figure 1I; Supplementary Figure 2I and J; Supplementary Figure 3I and J;**  
47  
48 271 **Supplementary Figure 6**), or when BW reduction was expressed as percentage change  
49  
50 272 (**Supplementary Figure 6**). Changes in the <25 kg/m<sup>2</sup> BMI subgroup were largely  
51  
52 273 consistent with those observed in the broader population (**Supplementary Section IV,**  
53  
54 274 **Figures 7 and 8**).

55  
56  
57 275 **Treatment–subgroup interaction effects**  
58  
59  
60

1  
2  
3 276 For each of the subgroups, analysis of the ETDs for the change from baseline in HbA<sub>1c</sub> in  
4  
5 277 the age, sex, diabetes duration, baseline HbA<sub>1c</sub> and baseline BMI subgroups, the  
6  
7 278 p-values for the low-dose and high-dose comparisons were nonsignificant, except in the  
8  
9 279 analysis of the HbA<sub>1c</sub> subgroups within the low-dose comparison (p<0.05 for the  
10  
11 280 treatment–subgroup interaction effect) (**Figure 1A**). The change from baseline in BW in  
12  
13 281 the age, sex, diabetes duration, baseline HbA<sub>1c</sub> and baseline BMI subgroups was similar,  
14  
15 282 with nonsignificant treatment–subgroup interactions for both dose comparisons  
16  
17 283 (**Figure 1B**). Similarly, treatment–subgroup interactions were nonsignificant for the  
18  
19 284 analysis of the ORs for the proportions of subjects achieving glycaemic targets and  
20  
21 285 weight-loss responses (**Supplementary Section II, Figures 4 and 5**).

### 23 24 286 **Safety outcomes**

25  
26 287 Overall, AEs were reported in more than half of subjects irrespective of the subgroup  
27  
28 288 category (ranging from 55.3% [dulaglutide 0.75 mg; diabetes duration >5–10 years] to  
29  
30 289 80.6% [dulaglutide 1.5 mg; elderly]) and were generally more common with  
31  
32 290 semaglutide 0.5 mg than with dulaglutide 0.75 mg, and less common with semaglutide  
33  
34 291 1.0 mg than with dulaglutide 1.5 mg. Premature treatment discontinuations due to AEs  
35  
36 292 were higher with semaglutide than with dulaglutide, and were primarily due to GI AEs  
37  
38 293 (**Tables 3 and 4; Supplementary Section III, Tables 5–7**).

294 **Table 3. Adverse events by age**

| n (%)                                                               | All subjects  | <65 years     |               |               |               | ≥65 years    |              |              |              |
|---------------------------------------------------------------------|---------------|---------------|---------------|---------------|---------------|--------------|--------------|--------------|--------------|
|                                                                     |               | Sema 0.5 mg   | Dula 0.75 mg  | Sema 1.0 mg   | Dula 1.5 mg   | Sema 0.5 mg  | Dula 0.75 mg | Sema 1.0 mg  | Dula 1.5 mg  |
|                                                                     | <b>1,199</b>  | <b>222</b>    | <b>238</b>    | <b>247</b>    | <b>232</b>    | <b>79</b>    | <b>61</b>    | <b>53</b>    | <b>67</b>    |
| AEs                                                                 | 818<br>(68.2) | 152<br>(68.5) | 150<br>(63.0) | 166<br>(67.2) | 167<br>(72.0) | 52<br>(65.8) | 36<br>(59.0) | 41<br>(77.4) | 54<br>(80.6) |
| Serious AEs                                                         | 86<br>(7.2)   | 10<br>(4.5)   | 18<br>(7.6)   | 20<br>(8.1)   | 16<br>(6.9)   | 7<br>(8.9)   | 6<br>(9.8)   | 3<br>(5.7)   | 6<br>(9.0)   |
| AEs leading to premature treatment discontinuation                  | 87<br>(7.3)   | 17<br>(7.7)   | 12<br>(5.0)   | 19<br>(7.7)   | 16<br>(6.9)   | 7<br>(8.9)   | 2<br>(3.3)   | 10<br>(18.9) | 4<br>(6.0)   |
| Gastrointestinal AEs leading to premature treatment discontinuation | 54<br>(4.5)   | 12<br>(5.4)   | 5<br>(2.1)    | 13<br>(5.2)   | 13<br>(5.6)   | 4<br>(5.1)   | 1<br>(1.6)   | 5<br>(9.4)   | 1<br>(1.5)   |
| Gastrointestinal AEs                                                | 505<br>(42.1) | 99<br>(44.6)  | 80<br>(33.6)  | 105<br>(42.5) | 108<br>(46.6) | 30<br>(38.0) | 20<br>(32.8) | 28<br>(52.8) | 35<br>(52.2) |
| Vomiting                                                            | 103<br>(8.6)  | 23<br>(10.4)  | 7<br>(2.9)    | 27<br>(10.9)  | 21<br>(9.1)   | 8<br>(10.1)  | 5<br>(8.2)   | 4<br>(7.5)   | 8<br>(11.9)  |
| Nausea                                                              | 230<br>(19.2) | 49<br>(22.1)  | 33<br>(13.9)  | 52<br>(21.1)  | 43<br>(18.5)  | 19<br>(24.1) | 6<br>(9.8)   | 11<br>(20.8) | 17<br>(25.4) |
| Diarrhoea                                                           | 160<br>(13.3) | 32<br>(14.4)  | 21<br>(8.8)   | 32<br>(13.0)  | 42<br>(18.1)  | 11<br>(13.9) | 2<br>(3.3)   | 9<br>(17.0)  | 11<br>(16.4) |
| Hypoglycaemia (severe/BG-confirmed)                                 | 15<br>(1.3)   | 2<br>(0.9)    | 1<br>(0.4)    | 4<br>(1.6)    | 5<br>(2.2)    | 0            | 2<br>(3.3)   | 1<br>(1.9)   | 0            |

295 Data are presented as number and proportion (%) of subjects with adverse events. Hypoglycaemia was defined as an episode that was severe (according to the American  
 296 Diabetes Association classification) or BG-confirmed (plasma glucose value <56 mg/dL [3.1 mmol/L]) with symptoms consistent with hypoglycaemia. AE, adverse event;  
 297 BG, blood glucose; Dula, dulaglutide; n, number of subjects randomised and exposed to at least one dose of trial product as treated (safety analysis set); Sema,  
 298 semaglutide.

299 **Table 4. Adverse events by baseline BMI**

| n (%)                                                               | All subjects  | <30 kg/m <sup>2</sup> |              |              |              | 30–<35 kg/m <sup>2</sup> |              |              |              | ≥35 kg/m <sup>2</sup> |              |              |              |
|---------------------------------------------------------------------|---------------|-----------------------|--------------|--------------|--------------|--------------------------|--------------|--------------|--------------|-----------------------|--------------|--------------|--------------|
|                                                                     |               | Sema 0.5 mg           | Dula 0.75 mg | Sema 1.0 mg  | Dula 1.5 mg  | Sema 0.5 mg              | Dula 0.75 mg | Sema 1.0 mg  | Dula 1.5 mg  | Sema 0.5 mg           | Dula 0.75 mg | Sema 1.0 mg  | Dula 1.5 mg  |
|                                                                     | <b>1,199</b>  | <b>99</b>             | <b>100</b>   | <b>91</b>    | <b>109</b>   | <b>90</b>                | <b>86</b>    | <b>105</b>   | <b>81</b>    | <b>112</b>            | <b>113</b>   | <b>104</b>   | <b>108</b>   |
| AEs                                                                 | 818<br>(68.2) | 65<br>(65.7)          | 60<br>(60.0) | 65<br>(71.4) | 84<br>(77.1) | 60<br>(66.7)             | 54<br>(62.8) | 66<br>(62.9) | 65<br>(80.2) | 79<br>(70.5)          | 72<br>(63.7) | 76<br>(73.1) | 71<br>(65.7) |
| Serious AEs                                                         | 86<br>(7.2)   | 4<br>(4.0)            | 4<br>(4.0)   | 5<br>(5.5)   | 4<br>(3.7)   | 6<br>(6.7)               | 6<br>(7.0)   | 5<br>(4.8)   | 12<br>(14.8) | 7<br>(6.3)            | 14<br>(12.4) | 13<br>(12.5) | 6<br>(5.6)   |
| AEs leading to premature treatment discontinuation                  | 87<br>(7.3)   | 12<br>(12.1)          | 8<br>(8.0)   | 12<br>(13.2) | 16<br>(14.7) | 8<br>(8.9)               | 5<br>(5.8)   | 8<br>(7.6)   | 2<br>(2.5)   | 4<br>(3.6)            | 1<br>(0.9)   | 9<br>(8.7)   | 2<br>(1.9)   |
| Gastrointestinal AEs leading to premature treatment discontinuation | 54<br>(4.5)   | 9<br>(9.1)            | 4<br>(4.0)   | 9<br>(9.9)   | 11<br>(10.1) | 5<br>(5.6)               | 2<br>(2.3)   | 5<br>(4.8)   | 2<br>(2.5)   | 2<br>(1.8)            | 0            | 4<br>(3.8)   | 1<br>(0.9)   |
| Gastrointestinal AEs                                                | 505<br>(42.1) | 48<br>(48.5)          | 32<br>(32.0) | 44<br>(48.4) | 59<br>(54.1) | 39<br>(43.3)             | 27<br>(31.4) | 44<br>(41.9) | 41<br>(50.6) | 42<br>(37.5)          | 41<br>(36.3) | 45<br>(43.3) | 42<br>(38.9) |
| Vomiting                                                            | 103<br>(8.6)  | 16<br>(16.2)          | 5<br>(5.0)   | 11<br>(12.1) | 15<br>(13.8) | 6<br>(6.7)               | 3<br>(3.5)   | 12<br>(11.4) | 4<br>(4.9)   | 9<br>(8.0)            | 4<br>(3.5)   | 8<br>(7.7)   | 10<br>(9.3)  |
| Nausea                                                              | 230<br>(19.2) | 25<br>(25.3)          | 9<br>(9.0)   | 19<br>(20.9) | 24<br>(22.0) | 21<br>(23.3)             | 11<br>(12.8) | 24<br>(22.9) | 19<br>(23.5) | 22<br>(19.6)          | 19<br>(16.8) | 20<br>(19.2) | 17<br>(15.7) |
| Diarrhoea                                                           | 160<br>(13.3) | 18<br>(18.2)          | 6<br>(6.0)   | 14<br>(15.4) | 28<br>(25.7) | 13<br>(14.4)             | 9<br>(10.5)  | 14<br>(13.3) | 14<br>(17.3) | 12<br>(10.7)          | 8<br>(7.1)   | 13<br>(12.5) | 10<br>(9.3)  |
| Hypoglycaemia (severe/BG-confirmed)                                 | 15<br>(1.3)   | 0                     | 1<br>(1.0)   | 0            | 3<br>(2.8)   | 0                        | 1<br>(1.2)   | 2<br>(1.9)   | 0            | 2<br>(1.8)            | 1<br>(0.9)   | 3<br>(2.9)   | 2<br>(1.9)   |

300 Data are presented as number and proportion (%) in percent of subjects with adverse events. Hypoglycaemia was defined as an episode that was severe (according to the  
 301 American Diabetes Association classification) or BG-confirmed (plasma glucose value <56 mg/dL [3.1 mmol/L]) with symptoms consistent with hypoglycaemia. AE, adverse  
 302 event; BG, blood glucose; BMI, body mass index; Dula, dulaglutide; n, number of subjects randomised and exposed to at least one dose of trial product as treated (safety  
 303 analysis set); Sema, semaglutide.

1  
2  
3  
4 304 GI AEs were the most frequently reported events, with generally higher rates with  
5  
6 305 semaglutide 0.5 mg vs dulaglutide 0.75 mg, and dulaglutide 1.5 mg vs semaglutide  
7  
8 306 1.0 mg, across the subgroups and subgroup categories (ranging from 27.7%  
9  
10 307 [dulaglutide 0.75 mg; diabetes duration >5–10 years] to 59.5% [dulaglutide 1.5 mg;  
11  
12 308 HbA<sub>1c</sub> ≤7.5% [58 mmol/mol]), with nausea being the most common (ranging from 8.1%  
13  
14 309 [dulaglutide 0.75 mg; male] to 29.5% [semaglutide 0.5 mg; female]) (**Tables 3 and 4;**  
15  
16 310 **Supplementary Section III, Tables 5–7**). Across the subgroup categories, more  
17  
18 311 female than male subjects reported GI AEs overall, with GI AEs generally decreasing  
19  
20 312 with increasing BMI in subjects treated with semaglutide (**Table 4 and Supplementary**  
21  
22 313 **Section III, Table 4**). The highest proportion of GI AEs were reported by subjects with  
23  
24 314 BMI <25 kg/m<sup>2</sup> (**Supplementary Section V, Table 8**).

25  
26 315

## 29 316 **DISCUSSION**

31  
32 317 Given the heterogeneous profile of patients with T2D and the guidance for such  
33  
34 318 differences to be considered when making treatment choices,(2-3) this *post hoc* analysis  
35  
36 319 of SUSTAIN 7 data assessed the impact of individual clinical characteristics on the effect  
37  
38 320 of semaglutide vs dulaglutide treatment. The analyses indicate that the effect of  
39  
40 321 semaglutide vs dulaglutide was not influenced by age, sex, diabetes duration, HbA<sub>1c</sub> or  
41  
42 322 BMI at baseline, with the exception of the low-dose comparison for HbA<sub>1c</sub> in the baseline  
43  
44 323 HbA<sub>1c</sub> subgroup, which showed increasing efficacy for semaglutide 0.5 mg vs dulaglutide  
45  
46 324 0.75 mg in subjects with increasing HbA<sub>1c</sub> at baseline.

47  
48 325 This *post hoc* analysis supports the finding from the overall SUSTAIN 7 trial that  
49  
50 326 semaglutide was superior to dulaglutide in reducing HbA<sub>1c</sub> and BW;(36) the same was  
51  
52 327 observed across each of the subgroups and within the various subgroup categories  
53  
54 328 presented here.

55  
56  
57 329 This *post hoc* analysis also supports findings from similar subgroup analyses of SUSTAIN  
58  
59 330 trials. An analysis of SUSTAIN 1–5 data showed greater reductions in HbA<sub>1c</sub> and BW with  
60

1  
2  
3 331 semaglutide vs comparators, and comparable efficacy in elderly subjects (a population  
4  
5 332 often presenting with comorbidities) and non-elderly subjects, without an increased risk  
6  
7 333 of hypoglycaemia.(25) Similarly, analyses of pooled SUSTAIN data showed clinically  
8  
9 334 relevant reductions in HbA<sub>1c</sub> and BW with semaglutide, regardless of baseline BW, HbA<sub>1c</sub>,  
10  
11 335 diabetes duration, race and ethnicity.(23-26,28)  
12  
13  
14 336 HbA<sub>1c</sub> reductions were greater with increasing baseline HbA<sub>1c</sub> for both semaglutide and  
15  
16 337 dulaglutide in the present analyses, which has been observed with dulaglutide  
17  
18 338 previously,(29,31-33) as well as with liraglutide,(38) lixisenatide (39) and other  
19  
20 339 antihyperglycaemic agents. Furthermore, a converse relationship between weight loss  
21  
22 340 and baseline HbA<sub>1c</sub> levels was observed, whereby increasing baseline HbA<sub>1c</sub> was  
23  
24 341 associated with greater reductions in HbA<sub>1c</sub> but a decreasing magnitude of weight loss. A  
25  
26 342 similar pattern has been observed with liraglutide as an add-on to insulin treatment,(40)  
27  
28 343 with exenatide alone (41) and with dulaglutide.(31,32) These findings have relevance for  
29  
30 344 clinical practice, indicating that there may be an effect with GLP-1RAs (and potentially  
31  
32 345 other antihyperglycaemic therapies) in predicting treatment responses based on HbA<sub>1c</sub>  
33  
34 346 levels.(40) Conversely, a recent analysis of the AWARD trials found a weak positive  
35  
36 347 correlation between HbA<sub>1c</sub> reduction and weight loss with dulaglutide.(42) Several  
37  
38 348 mechanisms, also associated with other antihyperglycaemic agents, may contribute to  
39  
40 349 these results.(43) Improved treatment-related glycaemic control is associated with  
41  
42 350 decreased glycosuria,(40,43) normalised protein turnover and a decreased catabolic  
43  
44 351 effect,(43) in addition to decreased energy expenditure and resting metabolic rate.(43)  
45  
46 352 As GLP-1RAs exhibit a glucose-dependent mechanism of action, the greater post-  
47  
48 353 treatment reductions in HbA<sub>1c</sub> from a higher initial baseline HbA<sub>1c</sub> may contribute to the  
49  
50 354 retention of glucose calories and, thereby, moderation of the achievable weight loss. In  
51  
52 355 these analyses, greater weight loss was observed with increasing baseline BMI for both  
53  
54 356 semaglutide and dulaglutide, aligning with what has been previously reported for  
55  
56 357 semaglutide (23) and dulaglutide.(35) While percentage weight loss was also greater  
57  
58 358 with semaglutide vs dulaglutide, the percentage change in weight loss was generally of a  
59  
60

1  
2  
3 359 similar magnitude across BMI categories, indicating that the weight-loss pattern  
4  
5 360 observed across the HbA<sub>1c</sub> subgroup categories may be associated with subjects'  
6  
7 361 baseline BMI. High BMI is associated with an insulin resistant-phenotype in some  
8  
9 362 patients,(3) and less weight loss is observed in patients with diabetes who are insulin  
10  
11 363 resistant than in those with insulin sensitivity.(44) However, clinically relevant reductions  
12  
13 364 in BW were achieved for all BMI subgroup categories, and the magnitude of weight loss  
14  
15 365 was comparatively greater for semaglutide than for dulaglutide. This is an important  
16  
17 366 consideration for clinical practice, given the increasing interest in weight management as  
18  
19 367 a key aspect of treatment for T2D.(1)

21  
22 368 Analysis of the ETDs for change from baseline in HbA<sub>1c</sub> and BW and ORs for the  
23  
24 369 proportions of subjects achieving HbA<sub>1c</sub> targets or weight-loss responses indicated a  
25  
26 370 consistent effect of semaglutide vs dulaglutide across subgroup categories. These  
27  
28 371 findings are aligned with previous analyses of subpopulations treated with GLP-1RAs,  
29  
30 372 including semaglutide and dulaglutide, which also reported a nonsignificant impact of  
31  
32 373 age, sex or diabetes duration on treatment effect,(23-27,29-35) although weight loss  
33  
34 374 tended to be greater in women than in men with dulaglutide,(31) as was also observed  
35  
36 375 in this analysis.

37  
38 376 Consistent with the known class effect of GLP-1RAs,(45) both semaglutide and  
39  
40 377 dulaglutide reported relatively high levels of GI AEs. The rate of GI AEs was higher with  
41  
42 378 semaglutide vs dulaglutide in the low-dose comparison; in the high-dose comparison it  
43  
44 379 was higher with dulaglutide vs semaglutide.(36) Premature treatment discontinuations  
45  
46 380 due to AEs were higher with semaglutide than with dulaglutide, which may be due to the  
47  
48 381 higher levels of moderate GI AEs observed in the overall SUSTAIN 7 trial.(36) The  
49  
50 382 occurrence of some GIs AEs may be dose-dependent and nausea (and also vomiting for  
51  
52 383 semaglutide) is usually transient with both semaglutide (46) and dulaglutide;(14)  
53  
54 384 furthermore, the dose-escalation regimen approved for semaglutide has been shown to  
55  
56 385 mitigate these AEs.(46) In the subgroups in the present analyses, GI AEs were higher  
57  
58 386 with dulaglutide 1.5 mg vs semaglutide 1.0 mg in elderly subjects with longer diabetes  
59  
60

1  
2  
3 387 duration, and lower in subjects with HbA<sub>1c</sub> >8.5% (69 mmol/mol) and higher BMI. There  
4  
5 388 were no other associations between subjects' baseline characteristics with the incidence  
6  
7 389 of GI AEs. Subjects who experience GI AEs, specifically nausea and vomiting, have  
8  
9 390 greater weight loss compared with those who do not.(23,47) While this hypothesised  
10  
11 391 association might be considered an explanation for the observed greater weight loss with  
12  
13 392 semaglutide vs dulaglutide in the low-dose comparison, a mediation analysis has  
14  
15 393 previously shown that the direct effects of semaglutide on BW are the main contributors  
16  
17 394 to weight loss with very little effect attributable to GI AEs.(47,48). Our analyses support  
18  
19 395 this finding as, overall, there were no clear trends between the incidence of GI AEs and  
20  
21 396 the greater efficacy of semaglutide in terms of HbA<sub>1c</sub> reduction and weight loss vs  
22  
23 397 dulaglutide.(31) With semaglutide, there was a trend towards decreasing GI AEs with  
24  
25 398 increasing baseline BMI, which has also been previously reported for the SUSTAIN 1–5  
26  
27 399 (23) and the AWARD 1–6 (49) trials, and may be due to differences in exposure–  
28  
29 400 response levels associated with BW as has been demonstrated with semaglutide.(50)  
30  
31 401 Similarly, an analysis has shown that elderly patients with a lower BMI are more likely to  
32  
33 402 experience side effects (including GI AEs) with dulaglutide than younger patients with a  
34  
35 403 higher BMI.(49) However, it is noted that this was a *post hoc* analysis in Japanese  
36  
37 404 patients, with low event rates for some GI AEs, and so the results may not be  
38  
39 405 generalizable to a wider diabetes population. In either case, a dose-escalation regimen  
40  
41 406 may be beneficial.

42  
43  
44 407 A strength of the present analysis is the inclusion of comparator data, which allows for a  
45  
46 408 more robust analysis and direct comparison of the differences in efficacy and safety of  
47  
48 409 semaglutide vs dulaglutide across the subgroups and subgroup categories. However, the  
49  
50 410 *post hoc* nature of this analysis means there are inherent limitations and, as such, the  
51  
52 411 data should be interpreted with caution. Also, as the analysis is based on SUSTAIN 7  
53  
54 412 alone, it may only be representative of the trial-specific patient population. A further  
55  
56 413 limitation is the relatively small number of subjects in each subgroup category.  
57  
58 414 Additionally, in the age subgroups, there was an imbalance in subject numbers (elderly  
59  
60



1  
2  
3 415 vs non-elderly), with relatively few patients in the elderly subgroup (260; 22% of the  
4  
5 416 analysis population). However, given the overall consistency of the age-subgroup  
6  
7 417 analyses, as well as the general limitations of these *post hoc* analyses, the difference in  
8  
9 418 subject numbers between the age subgroup categories seemed to have had little or no  
10  
11 419 impact. Furthermore, elderly subjects in previous pooled analyses of the SUSTAIN 1–5  
12  
13 420 (26) and AWARD (30,32) trials have demonstrated similar efficacy and safety,  
14  
15 421 supporting the results obtained here.

16  
17  
18 422 This analysis provides insight on the influence of five of the most common and relevant  
19  
20 423 patient-level factors from a clinical perspective and highlights semaglutide as an  
21  
22 424 effective choice across these patient subgroups that are commonly encountered in  
23  
24 425 clinical practice. Understanding the impact of heterogeneity in clinical characteristics on  
25  
26 426 the treatment differences between GLP-1RAs further supports patient-centred decision-  
27  
28 427 making in clinical practice.

29  
30 428

## 31 32 33 429 **CONCLUSIONS**

34  
35 430 Semaglutide was associated with superior efficacy to dulaglutide across various clinically  
36  
37 431 relevant patient subgroups that are commonly encountered in clinical practice, with a  
38  
39 432 safety profile similar to other GLP-1RAs and in line with previously published data for  
40  
41 433 semaglutide. The treatment effect for semaglutide vs dulaglutide did not appear to be  
42  
43 434 influenced by age, sex, diabetes duration, HbA<sub>1c</sub> or BMI at baseline. This indicates that  
44  
45 435 the efficacy of semaglutide vs dulaglutide is retained across a range of diverse clinical  
46  
47 436 characteristics, thereby increasing the evidence base available to clinicians to guide care.

48  
49  
50 437

## 51 52 53 438 **ACKNOWLEDGEMENTS**

54  
55 439 We thank all the trial subjects, investigators and trial-site staff members who were  
56  
57 440 involved in the SUSTAIN trials; Charlotte Hindsberger and Thomas Hansen (both  
58  
59 441 Novo Nordisk) for review and suggestions for revising the manuscript; and  
60

1  
2  
3 442 Stacy Carl-McGrath (AXON Communications) for medical writing and editorial assistance.  
4  
5 443 This study and the associated trials were supported by Novo Nordisk A/S, Denmark. The  
6  
7 444 funding sources contributed to the design and conduct of the trials, the analysis and  
8  
9 445 interpretation of the data and the preparation, review and approval of the manuscript.  
10  
11  
12 446

#### 14 447 **COMPETING INTERESTS**

16 448 The authors received no grants or funding for the writing of this article. In relation to the  
17  
18 449 submitted work, RP reports grants from Novo Nordisk to his institution, AdventHealth, a  
19  
20 450 nonprofit organisation, and VA also reports grants from Novo Nordisk to her institution.  
21  
22

23 451 Outside of this work, RP reports speaker and consulting fees from AstraZeneca;  
24  
25 452 consulting fees from Boehringer Ingelheim; consulting fees from Eisai, Inc.; consulting  
26  
27 453 fees from GlaxoSmithKline; consulting fees from Glytec, LLC; consulting fees from  
28  
29 454 Janssen; grants from Lexicon Pharmaceuticals; grants and consulting fees from Ligand  
30  
31 455 Pharmaceuticals, Inc., grants and consulting fees from Lilly; grants and consulting fees  
32  
33 456 from Merck; consulting fees from Mundipharma; grants, speaker fees and consulting fees  
34  
35 457 from Novo Nordisk; consulting fees from Pfizer; grants and consulting fees from Sanofi;  
36  
37 458 grants, speaker fees and consulting fees from Takeda; and personal consulting fees from  
38  
39 459 Sanofi US Services, Inc. Except for consulting fees in February 2018 and June 2018 from  
40  
41 460 Sanofi US Services, Inc., RP's services were paid for directly to AdventHealth. VA has  
42  
43 461 received consulting fees (to her institution) from Adocia; grants (to her institution) and  
44  
45 462 consulting fees (to her institution) from AstraZeneca/BMS; consulting fees from Becton-  
46  
47 463 Dickinson; grants (to her institution) from Boehringer Ingelheim; grants (to her  
48  
49 464 institution) from Calibra; consulting fees from Duke University; grants (to her institution)  
50  
51 465 from Eisai; grants (to her institution) from Fractyl; grants (to her institution) from  
52  
53 466 Janssen; grants (to her institution) and consulting fees from Novo Nordisk; grants (to  
54  
55 467 her institution) and consulting fees from Sanofi; grants (to her institution) from  
56  
57 468 Theracos; and consulting fees from Zafgen, all outside of the submitted work; and is the  
58  
59 469 spouse of an employee of Merck Research Laboratories. AMC is an employee of

1  
2  
3 470 Novo Nordisk. In relation to the submitted work, IL reports grants to her institution from  
4  
5 471 Novo Nordisk. Outside of the submitted work, IL has received consulting fees from  
6  
7 472 AstraZeneca; consulting fees from Boehringer Ingelheim; grants from GI Dynamics;  
8  
9 473 consulting fees from Intarcia; consulting fees from Janssen; consulting fees from Lilly;  
10  
11 474 consulting fees from Mannkind; grants from Merck; grants from Mylan; grants from  
12  
13 475 Novartis; grants and consulting fees from Novo Nordisk; grants from Pfizer; consulting  
14  
15 476 fees from Sanofi; consultant fees from TARGETPharma; and consulting fees from  
16  
17 477 Valeritas, all outside of the submitted work. JL reports being an investigator in clinical  
18  
19 478 studies for Eli Lilly and Novo Nordisk outside of the submitted work. EY is an employee  
20  
21 479 and minor shareholder of Novo Nordisk. AV has received lecture/other fees and non-  
22  
23 480 financial (clinical research) support from AstraZeneca; non-financial (clinical research)  
24  
25 481 support from Amgen; lecture/other fees from Boehringer Ingelheim; lecture/other fees  
26  
27 482 and non-financial (clinical research) support from Eli Lilly; lecture/other fees from  
28  
29 483 Merck Sharp & Dohme; lecture/other fees from Napp, lecture/other fees and non-  
30  
31 484 financial (clinical research) support from Novo Nordisk; non-financial (clinical research)  
32  
33 485 support from Novartis; and lecture/other fees and non-financial (clinical research)  
34  
35 486 support from Sanofi, all outside of the submitted work.  
36  
37  
38  
39

487

#### 488 **FUNDING**

489 This work was supported by Novo Nordisk A/S. Editorial support was provided by Stacy  
490 Carl-McGrath PhD (AXON Communications), funded by Novo Nordisk A/S.

491

#### 492 **DATA SHARING STATEMENT**

493 Individual participant data will be shared in datasets in a deidentified format, including  
494 datasets from Novo Nordisk-sponsored clinical research completed after 2001 for product  
495 indications approved in both the European Union and USA. The study protocol and  
496 redacted clinical study report will be available according to Novo Nordisk data sharing

1  
2  
3 497 commitments. Data will be available permanently after research completion and  
4  
5 498 approval of product and product use in the European Union and USA. Data will only be  
6  
7 499 shared with *bona fide* researchers submitting a research proposal and requesting access  
8  
9 500 to data, for use as approved by the independent review board and according to its  
10  
11 501 charter. The access request proposal form and the access criteria can be found online.  
12  
13 502 Data will be made available on a specialised Statistical Analysis System data platform.  
14  
15  
16 503

#### 17 18 504 **AUTHOR CONTRIBUTIONS**

19  
20  
21 505 RP: conduct of trial, data collection, data analysis, data interpretation, manuscript  
22  
23 506 preparation, approval of submitted version; VA: conduct of trial, data collection, data  
24  
25 507 interpretation, manuscript preparation, approval of submitted version; AMC: data  
26  
27 508 interpretation, manuscript preparation, approval of submitted version; IL: conduct of  
28  
29 509 trial, data collection, data interpretation, manuscript preparation, approval of submitted  
30  
31 510 version; JL: conduct of the trial, data collection, data interpretation, manuscript  
32  
33 511 preparation, approval of submitted version; EY: data interpretation, manuscript  
34  
35 512 preparation, approval of submitted version; AV: data interpretation, manuscript  
36  
37 513 preparation, approval of submitted version.  
38  
39  
40 514

515 **REFERENCES**

- 516 1. American Diabetes Association. Standards of Medical Care in Diabetes–2019.  
517 Diabetes Care. 2019;42(Suppl 1).
- 518 2. Cosentino F, Grant PJ, Aboyans V, et al. 2019 ESC Guidelines on diabetes, pre-  
519 diabetes, and cardiovascular diseases developed in collaboration with the EASD. *Eur*  
520 *Heart J* 2019; doi: 10.1093/eurheartj/ehz486. [Epub ahead of print].
- 521 3. Ahlqvist E, Storm P, Käräjämäki A, et al. Novel subgroups of adult-onset diabetes  
522 and their association with outcomes: a data-driven cluster analysis of six variables.  
523 *Lancet Diabetes Endocrinol* 2018;6(5):361–9.
- 524 4. Pearson ER. Type 2 diabetes: a multifaceted disease. *Diabetologia*  
525 2019;62(7):1107–12.
- 526 5. Dennis JM, Shields BM, Henley WE, et al. Disease progression and treatment  
527 response in data-driven subgroups of type 2 diabetes compared with models based  
528 on simple clinical features: an analysis using clinical trial data. *Lancet Diabetes*  
529 *Endocrinol* 2019;7(6):442–51.
- 530 6. Rodbard HW, Lingvay I, Reed J, et al. Semaglutide added to basal insulin in type 2  
531 diabetes (SUSTAIN 5): a randomized, controlled trial. *J Clin Endocrinol Metab*  
532 2018;103(6):2291–301.
- 533 7. Sorli C, Harashima SI, Tsoukas GM, et al. Efficacy and safety of once-weekly  
534 semaglutide monotherapy versus placebo in patients with type 2 diabetes (SUSTAIN  
535 1): a double-blind, randomised, placebo-controlled, parallel-group, multinational,  
536 multicentre phase 3a trial. *Lancet Diabetes Endocrinol* 2017;5(4):251–60.
- 537 8. Ahmann AJ, Capehorn M, Charpentier G, et al. Efficacy and safety of once-weekly  
538 semaglutide versus exenatide ER in subjects with type 2 diabetes (SUSTAIN 3): a  
539 56-week, open-label, randomized clinical trial. *Diabetes Care* 2018;41(2):258–66.
- 540 9. Ahrén B, Masmiquel L, Kumar H, et al. Efficacy and safety of once-weekly  
541 semaglutide versus once-daily sitagliptin as an add-on to metformin,  
542 thiazolidinediones, or both, in patients with type 2 diabetes (SUSTAIN 2): a 56-  
543 week, double-blind, phase 3a, randomised trial. *Lancet Diabetes Endocrinol*  
544 2017;5(5):341–54.
- 545 10. Aroda VR, Bain SC, Cariou B, et al. Efficacy and safety of once-weekly semaglutide  
546 versus once-daily insulin glargine as add-on to metformin (with or without  
547 sulfonylureas) in insulin-naïve patients with type 2 diabetes (SUSTAIN 4): a

- 1  
2  
3 548 randomised, open-label, parallel-group, multicentre, multinational, phase 3a trial.  
4 549 *Lancet Diabetes Endocrinol* 2017;5(5):355–66.
- 5  
6 550 11. Dungan KM, Weitgasser R, Perez Manghi F, et al. A 24-week study to evaluate the  
7 551 efficacy and safety of once-weekly dulaglutide added on to glimepiride in type 2  
8 552 diabetes (AWARD-8). *Diabetes Obes Metab* 2016;18(5):475–82.
- 9  
10 553 12. Ludvik B, Frías JP, Tinahones FJ, et al. Dulaglutide as add-on therapy to SGLT2  
11 554 inhibitors in patients with inadequately controlled type 2 diabetes (AWARD-10): a  
12 555 24-week, randomised, double-blind, placebo-controlled trial. *Lancet Diabetes*  
13 556 *Endocrinol* 2018;6(5):370–81.
- 14  
15 557 13. Tuttle KR, Lakshmanan MC, Rayner B, et al. Dulaglutide versus insulin glargine in  
16 558 patients with type 2 diabetes and moderate-to-severe chronic kidney disease  
17 559 (AWARD-7): a multicentre, open-label, randomised trial. *Lancet Diabetes Endocrinol*  
18 560 2018;6(8):605–17.
- 19  
20 561 14. Wysham C, Blevins T, Arakaki R, et al. Efficacy and safety of dulaglutide added onto  
21 562 pioglitazone and metformin versus exenatide in type 2 diabetes in a randomized  
22 563 controlled trial (AWARD-1). *Diabetes Care* 2014;37(8):2159–67.
- 23  
24 564 15. Umpierrez G, Tofé Povedano S, Pérez Manghi F, et al. Efficacy and safety of  
25 565 dulaglutide monotherapy versus metformin in type 2 diabetes in a randomized  
26 566 controlled trial (AWARD-3). *Diabetes Care* 2014;37(8):2168–76.
- 27  
28 567 16. Nauck M, Weinstock RS, Umpierrez GE, et al. Efficacy and safety of dulaglutide  
29 568 versus sitagliptin after 52 weeks in type 2 diabetes in a randomized controlled trial  
30 569 (AWARD-5). *Diabetes Care* 2014;37(8):2149–58.
- 31  
32 570 17. Giorgino F, Benroubi M, Sun JH, et al. Efficacy and safety of once-weekly dulaglutide  
33 571 versus insulin glargine in patients with type 2 diabetes on metformin and glimepiride  
34 572 (AWARD-2). *Diabetes Care* 2015;38(12):2241–9.
- 35  
36 573 18. Blonde L, Jendle J, Gross J, et al. Once-weekly dulaglutide versus bedtime insulin  
37 574 glargine, both in combination with prandial insulin lispro, in patients with type 2  
38 575 diabetes (AWARD-4): a randomised, open-label, phase 3, non-inferiority study.  
39 576 *Lancet* 2015;385(9982):2057–66.
- 40  
41 577 19. Dungan KM, Povedano ST, Forst T, et al. Once-weekly dulaglutide versus once-daily  
42 578 liraglutide in metformin-treated patients with type 2 diabetes (AWARD-6): a  
43 579 randomised, open-label, phase 3, non-inferiority trial. *Lancet*  
44 580 2014;384(9951):1349–57.
- 45  
46 581 20. Pozzilli P, Norwood P, Jódar E, et al. Placebo-controlled, randomized trial of the  
47 582 addition of once-weekly glucagon-like peptide-1 receptor agonist dulaglutide to

- 1  
2  
3 583 titrated daily insulin glargine in patients with type 2 diabetes (AWARD-9). *Diabetes*  
4 584 *Obes Metab* 2017;19(7):1024–31.
- 5  
6  
7 585 21. Marso SP, Bain SC, Consoli A, et al. Semaglutide and cardiovascular outcomes in  
8 586 patients with type 2 diabetes. *N Engl J Med* 2016;375(19):1834–44.
- 9  
10 587 22. Gerstein HC, Colhoun HM, Dagenais GR, et al. Dulaglutide and cardiovascular  
11 588 outcomes in type 2 diabetes (REWIND): a double-blind, randomised placebo-  
12 589 controlled trial. *Lancet* 2019;394(10193):121–30.
- 13  
14  
15 590 23. Ahrén B, Atkin SL, Charpentier G, et al. Semaglutide induces weight loss in subjects  
16 591 with type 2 diabetes regardless of baseline BMI or gastrointestinal adverse events in  
17 592 the SUSTAIN 1 to 5 trials. *Diabetes Obes Metab* 2018;20(9):2210–9.
- 18  
19  
20 593 24. Bain SC, Araki E, Desouza C, et al. Semaglutide reduces HbA<sub>1c</sub> across baseline HbA<sub>1c</sub>  
21 594 subgroups in the SUSTAIN 1–5 clinical trials. 77th Scientific Sessions of the  
22 595 American Diabetes Association, San Diego, CA, USA, June 9–13, 2017 (Poster  
23 596 1123P).
- 24  
25  
26 597 25. Warren M, Chaykin L, Trachtenbarg D, et al. Semaglutide as a therapeutic option for  
27 598 elderly patients with type 2 diabetes: pooled analysis of the SUSTAIN 1-5 trials.  
28 599 *Diabetes Obes Metab* 2018;20(9):2291–7.
- 29  
30  
31 600 26. Rosenstock J, Chaykin L, Lüdemann J, et al. Consistent HbA<sub>1c</sub> and body weight  
32 601 reduction with semaglutide independent of diabetes duration: SUSTAIN 1–5 and 7  
33 602 patient-level meta-analysis. 78th Scientific Sessions of the American Diabetes  
34 603 Association, Orlando, FL, USA, June 22–26, 2018 (Poster 1081-P).
- 35  
36  
37 604 27. Hramiak I, Desouza C, Seufert J, et al. Semaglutide consistently reduces  
38 605 cardiovascular events in both male and female subjects with type 2 diabetes. 78th  
39 606 Scientific Sessions of the American Diabetes Association, Orlando, FL, USA, June 22–  
40 607 26, 2018 (Poster 1085-P).
- 41  
42  
43 608 28. Desouza C, Garg SK, Cariou B, et al. Efficacy and safety of semaglutide in subjects  
44 609 with type 2 diabetes across race and ethnicity subgroups: a *post hoc* analysis of the  
45 610 SUSTAIN trials. 27th Annual Scientific & Clinical Congress of the American  
46 611 Association of Clinical Endocrinologists, Boston, MA, USA, May 16–20, 2018 (Poster  
47 612 298).
- 48  
49  
50 613 29. Wysham C, Guerci B, D'Alessio D, et al. Baseline factors associated with glycaemic  
51 614 response to treatment with once-weekly dulaglutide in patients with type 2 diabetes.  
52 615 *Diabetes Obes Metab* 2016;18(11):1138–42.
- 53  
54  
55  
56  
57  
58  
59  
60



- 1  
2  
3 616 30. Boustani MA, Pittman I 4th, Yu M, et al. Similar efficacy and safety of once-weekly  
4 617 dulaglutide in patients with type 2 diabetes aged  $\geq 65$  and  $< 65$  years. *Diabetes Obes*  
5 618 *Metab* 2016;18(8):820–8.  
6  
7  
8 619 31. Gallwitz B, Dagogo-Jack S, et al. Effect of once-weekly dulaglutide on glycosylated  
9 620 haemoglobin (HbA<sub>1c</sub>) and fasting blood glucose in patient subpopulations by gender,  
10 621 duration of diabetes and baseline HbA<sub>1c</sub>. *Diabetes Obes Metab* 2018;20(2):409–18.  
11  
12  
13 622 32. Pantalone KM, Patel H, Yu M, et al. Dulaglutide 1.5 mg as an add-on option for  
14 623 patients uncontrolled on insulin: subgroup analysis by age, duration of diabetes and  
15 624 baseline glycosylated haemoglobin concentration. *Diabetes Obes Metab*  
16 625 2018;20(6):1461–9.  
17  
18  
19 626 33. Gentilella R, Romera I, Nicolay C, et al. Change in HbA<sub>1c</sub> across the baseline HbA<sub>1c</sub>  
20 627 range in type 2 diabetes patients receiving once-weekly dulaglutide versus other  
21 628 incretin agents. *Diabetes Ther* 2019;10(3):1113–25.  
22  
23  
24 629 34. Mathieu C, Del Prato S, Botros FT, et al. Effect of once weekly dulaglutide by  
25 630 baseline beta-cell function in people with type 2 diabetes in the AWARD programme.  
26 631 *Diabetes Obes Metab* 2018;20(8):2023–8.  
27  
28  
29 632 35. Fuechtenbusch M, Aberle J, Heitmann E, et al. Weight loss in patients with type 2  
30 633 diabetes receiving once-weekly dulaglutide plus insulin lispro or insulin glargine plus  
31 634 insulin lispro: a post-hoc analysis of the AWARD-4 study across baseline body mass  
32 635 index subgroups. *Diabetes Obes Metab* 2019;21(6):1340–8.  
33  
34  
35 636 36. Pratley RE, Aroda VR, Lingvay I, et al. Semaglutide versus dulaglutide once weekly  
36 637 in patients with type 2 diabetes (SUSTAIN 7): a randomised, open-label, phase 3b  
37 638 trial. *Lancet Diabetes Endocrinol* 2018;6(4):275–86.  
38  
39  
40 639 37. Jendle J, Grunberger G, Blevins T, et al. Efficacy and safety of dulaglutide in the  
41 640 treatment of type 2 diabetes: a comprehensive review of the dulaglutide clinical data  
42 641 focusing on the AWARD phase 3 clinical trial program. *Diabetes Metab Res Rev*  
43 642 2016;32(8):776–90.  
44  
45  
46 643 38. Henry RR, Buse JB, Sesti G, et al. Efficacy of antihyperglycemic therapies and the  
47 644 influence of baseline hemoglobin A(1C): a meta-analysis of the liraglutide  
48 645 development program. *Endocr Pract* 2011;17(6):906–13.  
49  
50  
51 646 39. Blonde L, Chava P, Dex T, et al. Predictors of outcomes in patients with type 2  
52 647 diabetes in the lixisenatide GetGoal clinical trials. *Diabetes Obes Metab*  
53 648 2017;19(2):275–83.  
54  
55  
56 649 40. Dahlqvist S, Ahlén E, Filipsson K, et al. Variables associated with HbA<sub>1c</sub> and weight  
57 650 reductions when adding liraglutide to multiple daily insulin injections in persons with



- 1  
2  
3 651 type 2 diabetes (MDI Liraglutide trial 3). *BMJ Open Diabetes Res Care*  
4 652 2018;6(1):e000464.
- 6 653 41. Frías JP, Hardy E, Ahmed A, et al. Effects of exenatide once weekly plus  
7 654 dapagliflozin, exenatide once weekly alone, or dapagliflozin alone added to  
8 655 metformin monotherapy in subgroups of patients with type 2 diabetes in the  
9 656 DURATION-8 randomized controlled trial. *Diabetes Obes Metab* 2018;20(6):1520–5.
- 13 657 42. Umpierrez GE, Pantalone KM, Kwan AY, et al. Relationship between weight change  
14 658 and glycaemic control in patients with type 2 diabetes receiving once-weekly  
15 659 dulaglutide treatment. *Diabetes Obes Metab* 2016;18(6):615–22.
- 18 660 43. Pi-Sunyer FX. Weight loss in type 2 diabetic patients. *Diabetes Care*  
19 661 2005;28(6):1526–27.
- 22 662 44. Fonseca VA, Capehorn MS, Garg SK, et al. Reductions in insulin resistance are  
23 663 mediated primarily via weight loss in subjects with type 2 diabetes on semaglutide. *J*  
24 664 *Clin Endocrinol Metab* 2019. doi: 10.1210/jc.2018-02685. [Epub ahead of print].
- 27 665 45. Bettge K, Kahle M, Abd El Aziz MS, et al. Occurrence of nausea, vomiting and  
28 666 diarrhoea reported as adverse events in clinical trials studying glucagon-like peptide-  
29 667 1 receptor agonists: a systematic analysis of published clinical trials. *Diabetes Obes*  
30 668 *Metab* 2017;19(3):336–47.
- 33 669 46. Nauck MA, Petrie JR, Sesti G, et al. A phase 2, randomized, dose-finding study of the  
34 670 novel once-weekly human GLP-1 analog, semaglutide, compared with placebo and  
35 671 open-label liraglutide in patients with type 2 diabetes. *Diabetes Care*  
36 672 2016;39(2):231–41.
- 40 673 47. Atkin S, Woo V, de la Rosa R, et al. The impact of gastrointestinal adverse events on  
41 674 weight loss with semaglutide in subjects with type 2 diabetes. 53rd Annual Meeting  
42 675 of the European Association for the Study of Diabetes (EASD), Lisbon, Portugal,  
43 676 11–15 September, 2017 (Poster 821).
- 46 677 48. Ahrén B, Atkin SL, Charpentier G, et al. Semaglutide induces weight loss in subjects  
47 678 with type 2 diabetes regardless of baseline BMI or gastrointestinal adverse events in  
48 679 the SUSTAIN 1 to 5 trials. *Diabetes Obes Metab* 2018;20(9):2210–9.
- 51 680 49. Hamano K, Nishiyama H, Matsui A, et al. Efficacy and safety analyses across 4  
52 681 subgroups combining low and high age and body mass index groups in Japanese  
53 682 phase 3 studies of dulaglutide 0.75 mg after 26 weeks of treatment. *Endocr J*  
54 683 2017;64(4):449–45.

- 1  
2  
3 684 50. Petri KCC, Ingwersen SH, Flint A, et al. Exposure-response analysis for evaluation of  
4 685 semaglutide dose levels in type 2 diabetes. *Diabetes Obes Metab* 2018;20(9):  
5 686 2238-45.  
6  
7  
8  
9  
10  
11  
12  
13  
14  
15  
16  
17  
18  
19  
20  
21  
22  
23  
24  
25  
26  
27  
28  
29  
30  
31  
32  
33  
34  
35  
36  
37  
38  
39  
40  
41  
42  
43  
44  
45  
46  
47  
48  
49  
50  
51  
52  
53  
54  
55  
56  
57  
58  
59  
60

For peer review only

## Figure Legends

**Figure 1. Estimated treatment differences for change from baseline in HbA<sub>1c</sub> shown as %-points (A), HbA<sub>1c</sub> shown as mmol/mol (B) and body weight (C) at week 40 by age, sex, diabetes duration, HbA<sub>1c</sub> and BMI at baseline.** \*p<0.05, \*\*p<0.001, \*\*\*p<0.0001; †p-values represent the test for treatment by subgroup interaction. Values are ETDs [95% CIs] for semaglutide vs dulaglutide (low-dose comparison [semaglutide 0.5 mg vs dulaglutide 0.75 mg] and high-dose comparison [semaglutide 1.0 mg vs dulaglutide 1.5 mg]) from ANCOVAs with multiple imputations using data from all randomised subjects exposed to at least one dose of trial product and did not discontinue treatment or receive any non-investigational antihyperglycaemic treatment (full analysis set) obtained while on treatment and prior to onset of rescue medication. ANCOVA controlled for baseline HbA<sub>1c</sub> (A) or body weight (B) and interaction between randomised treatment and subgroup. ANCOVA, analysis of covariance; BMI, body mass index; CI, confidence interval; ETD, estimated treatment difference; HbA<sub>1c</sub>, glycated haemoglobin.

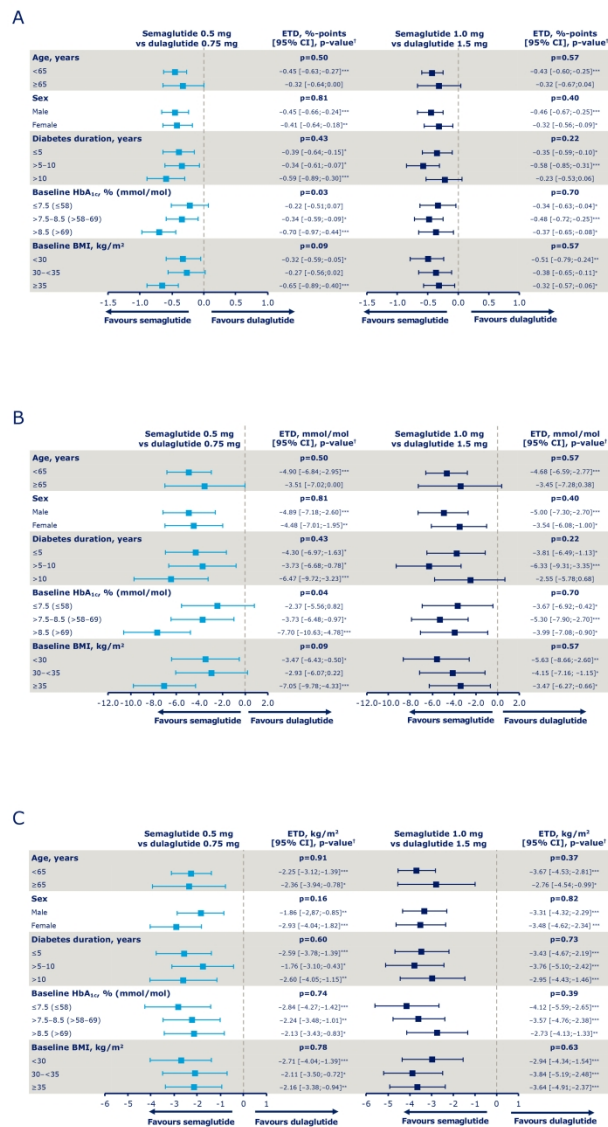

Figure 1. Estimated treatment differences for change from baseline in HbA<sub>1c</sub> shown as %-points (A), HbA<sub>1c</sub> shown as mmol/mol (B) and body weight (C) at week 40 by age, sex, diabetes duration, HbA<sub>1c</sub> and BMI at baseline. \*p<0.05, \*\*p<0.001, \*\*\*p<0.0001; †p values represent the test for treatment by subgroup interaction. Values are ETDs [95% CIs] for semaglutide vs dulaglutide (low-dose comparison [semaglutide 0.5 mg vs dulaglutide 0.75 mg] and high-dose comparison [semaglutide 1.0 mg vs dulaglutide 1.5 mg] from ANCOVAs with multiple imputations using 'on-treatment without rescue medication' data from all randomised subjects exposed to at least one dose of trial product as randomised (full analysis set) obtained while on treatment and prior to onset of rescue medication. ANCOVA controlled for baseline HbA<sub>1c</sub> (A, B) or body weight (C) and interaction between randomised treatment and subgroup. ANCOVA, analysis of covariance; BMI, body mass index; CI, confidence interval; ETD, estimated treatment difference; HbA<sub>1c</sub>, glycated haemoglobin.

## Supplementary Materials

### Full title:

Impact of patient characteristics on efficacy and safety of OW semaglutide vs dulaglutide: SUSTAIN 7 *post hoc* analyses

### Authors:

Pratley Richard E<sup>1</sup>, Aroda Vanita R<sup>2</sup>, Catarig Andrei M<sup>3</sup>, Lingvay Ildiko<sup>4</sup>, Lüdemann Jörg<sup>5</sup>, Yildirim Emre<sup>3</sup>, Viljoen Adie<sup>6</sup>

### Author affiliations:

<sup>1</sup>AdventHealth Translational Research Institute for Metabolism and Diabetes, Orlando, FL, USA; <sup>2</sup>Brigham and Women's Hospital, Boston, MA, USA; <sup>3</sup>Novo Nordisk A/S, Søborg, Denmark; <sup>4</sup>University of Texas Southwestern Medical Center, Dallas, TX, USA; <sup>5</sup>diabetes-falkensee, Diabetes Centre and Centre for Clinical Studies, Falkensee, Germany; <sup>6</sup>Borthwick Diabetes Research Centre, Lister Hospital, Stevenage, UK

### Contact details for corresponding author:

Dr Richard E. Pratley

AdventHealth Translational Research Institute for Metabolism and Diabetes

301 E. Princeton Street, Orlando, FL 32804, USA

Phone: +1-407-303-2519

E-mail: [Richard.Pratley.MD@AdventHealth.com](mailto:Richard.Pratley.MD@AdventHealth.com)

1  
2  
3 **SUPPLEMENTARY SECTION I: BASELINE CHARACTERISTICS**  
4  
5  
6  
7  
8  
9  
10  
11  
12  
13  
14  
15  
16  
17  
18  
19  
20  
21  
22  
23  
24  
25  
26  
27  
28  
29  
30  
31  
32  
33  
34  
35  
36  
37  
38  
39  
40  
41  
42  
43  
44  
45  
46  
47  
48  
49  
50  
51  
52  
53  
54  
55  
56  
57  
58  
59  
60

For peer review only

**Supplementary Table 1. Baseline characteristics by sex subgroups**

|                              | All subjects | Male         |              |              |             | Female      |              |             |             |
|------------------------------|--------------|--------------|--------------|--------------|-------------|-------------|--------------|-------------|-------------|
|                              |              | Sema 0.5 mg  | Dula 0.75 mg | Sema 1.0 mg  | Dula 1.5 mg | Sema 0.5 mg | Dula 0.75 mg | Sema 1.0 mg | Dula 1.5 mg |
| <b>n</b>                     | <b>1,199</b> | <b>169</b>   | <b>160</b>   | <b>162</b>   | <b>171</b>  | <b>132</b>  | <b>139</b>   | <b>138</b>  | <b>128</b>  |
| Age, years                   | 56 (10.6)    | 57.0 (10.9)  | 55.6 (10.1)  | 55.6 (10.3)  | 56.8 (10.5) | 55.3 (10.9) | 54.9 (10.7)  | 55.1 (11.0) | 54.7 (10.7) |
| Sex, n (%)                   |              |              |              |              |             |             |              |             |             |
| Male                         | 662 (55.2)   | 169 (100)    | 160 (100)    | 162 (100)    | 171 (100)   | -           | -            | -           | -           |
| Female                       | 537 (44.8)   | -            | -            | -            | -           | 132 (100)   | 139 (100)    | 138 (100)   | 128 (100)   |
| Diabetes duration, years     | 7.4 (5.7)    | 7.8 (5.8)    | 7.1 (5.7)    | 7.4 (5.5)    | 8.0 (5.6)   | 7.7 (6.1)   | 6.9 (5.2)    | 7.1 (5.9)   | 7.2 (5.7)   |
| HbA <sub>1c</sub> , %        | 8.2 (0.9)    | 8.4 (1.0)    | 8.2 (0.9)    | 8.2 (0.9)    | 8.2 (0.8)   | 8.3 (1.0)   | 8.1 (0.9)    | 8.2 (0.9)   | 8.2 (1.0)   |
| HbA <sub>1c</sub> , mmol/mol | 66.4 (10.0)  | 67.8 (10.5)  | 66.2 (10.0)  | 66.0 (10.2)  | 65.8 (9.0)  | 67.1 (10.4) | 66.4 (9.9)   | 65.2 (9.9)  | 66.6 (10.6) |
| Body weight, kg              | 95.2 (22.6)  | 102.3 (23.9) | 100.6 (23.4) | 100.8 (21.0) | 96.9 (21.5) | 88.9 (23.0) | 89.9 (21.3)  | 89.3 (19.0) | 88.8 (21.3) |
| BMI, kg/m <sup>2</sup>       | 33.5 (6.8)   | 33.3 (6.8)   | 32.8 (6.6)   | 32.7 (6.2)   | 32.0 (5.8)  | 34.2 (7.5)  | 34.6 (7.2)   | 34.7 (6.7)  | 34.5 (7.2)  |
| Race, n (%)                  |              |              |              |              |             |             |              |             |             |
| Asian                        | 191 (15.9)   | 24 (14.2)    | 31 (19.4)    | 25 (15.4)    | 32 (18.7)   | 26 (19.7)   | 17 (12.2)    | 13 (9.4)    | 23 (18.0)   |
| Black/African American       | 70 (5.8)     | 5 (3.0)      | 4 (2.5)      | 7 (4.3)      | 6 (3.5)     | 12 (9.1)    | 13 (9.4)     | 11 (8.0)    | 12 (9.4)    |
| White                        | 928 (77.4)   | 139 (82.2)   | 124 (77.5)   | 130 (80.2)   | 128 (74.9)  | 94 (71.2)   | 108 (77.7)   | 113 (81.9)  | 92 (71.9)   |
| Other                        | 10 (0.8)     | 1 (0.6)      | 1 (0.6)      | 0            | 5 (2.9)     | 0           | 1 (0.7)      | 1 (0.7)     | 1 (0.8)     |
| Ethnic group, n (%)          |              |              |              |              |             |             |              |             |             |
| Hispanic/Latino              | 138 (11.5)   | 18 (10.7)    | 15 (9.4)     | 14 (8.6)     | 24 (14.0)   | 11 (8.3)    | 16 (11.5)    | 21 (15.2)   | 19 (14.8)   |
| Non-Hispanic/Latino          | 1,061 (88.5) | 151 (89.3)   | 145 (90.6)   | 148 (91.4)   | 147 (86.0)  | 121 (91.7)  | 123 (88.5)   | 117 (84.8)  | 109 (85.2)  |

'On-treatment without rescue medication' data. Subgroup data are presented as mean (standard deviation) unless otherwise indicated. BMI, body mass index; Dula, dulaglutide; HbA<sub>1c</sub>, glycated haemoglobin; n, number of subjects randomised and exposed to at least one dose of trial product as randomised (full analysis set); Sema, semaglutide.

**Supplementary Table 2. Baseline characteristics by diabetes duration subgroups**

|                              | All subjects   | ≤5 years       |                |                 |                | >5–10 years    |                |                |                | >10 years      |                |                |                |
|------------------------------|----------------|----------------|----------------|-----------------|----------------|----------------|----------------|----------------|----------------|----------------|----------------|----------------|----------------|
|                              |                | Sema 0.5 mg    | Dula 0.75 mg   | Sema 1.0 mg     | Dula 1.5 mg    | Sema 0.5 mg    | Dula 0.75 mg   | Sema 1.0 mg    | Dula 1.5 mg    | Sema 0.5 mg    | Dula 0.75 mg   | Sema 1.0 mg    | Dula 1.5 mg    |
| <b>n</b>                     | <b>1,199</b>   | <b>113</b>     | <b>128</b>     | <b>122</b>      | <b>114</b>     | <b>101</b>     | <b>94</b>      | <b>103</b>     | <b>92</b>      | <b>87</b>      | <b>77</b>      | <b>75</b>      | <b>93</b>      |
| Age, years                   | 56<br>(10.6)   | 52.3<br>(11.0) | 51.7<br>(10.1) | 51.1<br>(11.6)  | 51.8<br>(10.2) | 55.5<br>(9.8)  | 57.0<br>(8.5)  | 56.8<br>(7.9)  | 57.0<br>(10.3) | 62.3<br>(9.3)  | 58.9<br>(11.0) | 60.4<br>(9.4)  | 59.9<br>(9.7)  |
| Sex, n (%)                   |                |                |                |                 |                |                |                |                |                |                |                |                |                |
| Male                         | 662<br>(55.2)  | 62<br>(54.9)   | 71<br>(55.5)   | 61<br>(50.0)    | 53<br>(46.5)   | 55<br>(54.5)   | 46<br>(48.9)   | 58<br>(56.3)   | 64<br>(69.6)   | 52<br>(59.8)   | 43<br>(55.8)   | 43<br>(57.3)   | 54<br>(58.1)   |
| Female                       | 537<br>(44.8)  | 51<br>(45.1)   | 57<br>(44.5)   | 61<br>(50.0)    | 61<br>(53.5)   | 46<br>(45.5)   | 48<br>(51.1)   | 45<br>(43.7)   | 28<br>(30.4)   | 35<br>(40.2)   | 34<br>(44.2)   | 32<br>(42.7)   | 39<br>(41.9)   |
| Diabetes duration, years     | 7.4<br>(5.7)   | 2.6<br>(1.3)   | 2.5<br>(1.3)   | 2.5<br>(1.4)    | 2.6<br>(1.4)   | 7.0<br>(1.4)   | 7.1<br>(1.3)   | 7.3<br>(1.3)   | 7.0<br>(1.4)   | 15.3<br>(4.9)  | 14.5<br>(4.5)  | 14.9<br>(5.3)  | 14.5<br>(4.4)  |
| HbA <sub>1c</sub> , %        | 8.2<br>(0.9)   | 8.2<br>(1.0)   | 8.1<br>(0.9)   | 8.2<br>(0.9)    | 8.2<br>(0.9)   | 8.3<br>(1.0)   | 8.2<br>(0.9)   | 8.2<br>(1.0)   | 8.2<br>(0.8)   | 8.4<br>(0.9)   | 8.2<br>(0.9)   | 8.2<br>(0.9)   | 8.2<br>(0.9)   |
| HbA <sub>1c</sub> , mmol/mol | 66.4<br>(10.0) | 66.6<br>(10.8) | 65.3<br>(10.2) | 66.6<br>(9.6)   | 65.9<br>(10.1) | 67.5<br>(10.4) | 66.1<br>(9.8)  | 65.9<br>(10.5) | 66.4<br>(9.0)  | 68.6<br>(10.1) | 66.0<br>(9.8)  | 65.9<br>(10.3) | 66.2<br>(10.0) |
| Body weight, kg              | 95.2<br>(22.6) | 97.2<br>(27.6) | 96.8<br>(24.0) | 100.4<br>(23.6) | 92.0<br>(22.9) | 95.1<br>(21.8) | 96.6<br>(23.7) | 94.7<br>(18.1) | 95.1<br>(23.3) | 96.8<br>(23.0) | 92.4<br>(20.3) | 88.6<br>(17.7) | 93.5<br>(18.8) |
| BMI, kg/m <sup>2</sup>       | 33.5<br>(6.8)  | 34.0<br>(7.9)  | 34.3<br>(7.3)  | 35.1<br>(7.8)   | 33.0<br>(6.7)  | 33.3<br>(6.3)  | 33.9<br>(7.2)  | 33.3<br>(5.4)  | 33.2<br>(6.9)  | 33.7<br>(7.1)  | 32.3<br>(5.7)  | 31.6<br>(4.7)  | 33.1<br>(6.1)  |
| Race, n (%)                  |                |                |                |                 |                |                |                |                |                |                |                |                |                |
| Asian                        | 191<br>(15.9)  | 25<br>(22.1)   | 30<br>(23.4)   | 19<br>(15.6)    | 35<br>(30.7)   | 18<br>(17.8)   | 11<br>(11.7)   | 9<br>(8.7)     | 13<br>(14.1)   | 7<br>(8.0)     | 7<br>(9.1)     | 10<br>(13.3)   | 7<br>(7.5)     |
| Black/African American       | 70<br>(5.8)    | 2<br>(1.8)     | 8<br>(6.3)     | 5<br>(4.1)      | 6<br>(5.3)     | 6<br>(5.9)     | 4<br>(4.3)     | 7<br>(6.8)     | 1<br>(1.1)     | 9<br>(10.3)    | 5<br>(6.5)     | 6<br>(8.0)     | 11<br>(11.8)   |
| White                        | 928<br>(77.4)  | 86<br>(76.1)   | 89<br>(69.5)   | 97<br>(79.5)    | 72<br>(63.2)   | 76<br>(75.2)   | 79<br>(84.0)   | 87<br>(84.5)   | 77<br>(83.7)   | 71<br>(81.6)   | 64<br>(83.1)   | 59<br>(78.7)   | 71<br>(76.3)   |
| Other                        | 10<br>(0.8)    | 0              | 1<br>(0.8)     | 1<br>(0.8)      | 1<br>(0.9)     | 1<br>(1.0)     | 0              | 0              | 1<br>(1.1)     | 0              | 1<br>(1.3)     | 0              | 4<br>(4.3)     |



|                     |                 |               |               |               |              |              |              |              |              |              |              |              |              |
|---------------------|-----------------|---------------|---------------|---------------|--------------|--------------|--------------|--------------|--------------|--------------|--------------|--------------|--------------|
| Ethnic group, n (%) |                 |               |               |               |              |              |              |              |              |              |              |              |              |
| Hispanic/Latino     | 138<br>(11.5)   | 11<br>(9.7)   | 9<br>(7.0)    | 13<br>(10.7)  | 17<br>(14.9) | 5<br>(5.0)   | 7<br>(7.4)   | 12<br>(11.7) | 15<br>(16.3) | 13<br>(14.9) | 15<br>(19.5) | 10<br>(13.3) | 11<br>(11.8) |
| Non-Hispanic/Latino | 1,061<br>(88.5) | 102<br>(90.3) | 119<br>(93.0) | 109<br>(89.3) | 97<br>(85.1) | 96<br>(95.0) | 87<br>(92.6) | 91<br>(88.3) | 77<br>(83.7) | 74<br>(85.1) | 62<br>(80.5) | 65<br>(86.7) | 82<br>(88.2) |

'On-treatment without rescue medication' data. Subgroup data are presented as mean (standard deviation) unless otherwise indicated. BMI, body mass index; Dula, dulaglutide; HbA<sub>1c</sub>, glycated haemoglobin; n, number of subjects randomised and exposed to at least one dose of trial product as randomised (full analysis set); Sema, semaglutide.

For peer review only

1  
2  
3  
4  
5  
6  
7  
8  
9  
10  
11  
12  
13  
14  
15  
16  
17  
18  
19  
20  
21  
22  
23  
24  
25  
26  
27  
28  
29  
30  
31  
32  
33  
34  
35  
36  
37  
38  
39  
40  
41  
42  
43  
44  
45  
46  
47

Supplementary Table 3. Baseline characteristics by baseline HbA<sub>1c</sub> subgroups

|                              | All subjects   | ≤7.5% (≤58 mmol/mol) |                |                |                | >7.5–8.5% (>58–69 mmol/mol) |                |                |                | >8.5% (>69 mmol/mol) |                |                |                |
|------------------------------|----------------|----------------------|----------------|----------------|----------------|-----------------------------|----------------|----------------|----------------|----------------------|----------------|----------------|----------------|
|                              |                | Sema 0.5 mg          | Dula 0.75 mg   | Sema 1.0 mg    | Dula 1.5 mg    | Sema 0.5 mg                 | Dula 0.75 mg   | Sema 1.0 mg    | Dula 1.5 mg    | Sema 0.5 mg          | Dula 0.75 mg   | Sema 1.0 mg    | Dula 1.5 mg    |
| <b>n</b>                     | <b>1,199</b>   | <b>74</b>            | <b>94</b>      | <b>83</b>      | <b>84</b>      | <b>120</b>                  | <b>105</b>     | <b>124</b>     | <b>120</b>     | <b>107</b>           | <b>100</b>     | <b>93</b>      | <b>95</b>      |
| Age, years                   | 56<br>(10.6)   | 57.5<br>(12.2)       | 57.0<br>(10.4) | 57.7<br>(11.1) | 58.1<br>(10.2) | 57.3<br>(10.1)              | 53.3<br>(10.6) | 55.6<br>(9.7)  | 55.4<br>(10.5) | 54.3<br>(10.7)       | 53.5<br>(9.9)  | 53.1<br>(10.9) | 54.5<br>(10.9) |
| Sex, n (%)                   |                |                      |                |                |                |                             |                |                |                |                      |                |                |                |
| Male                         | 662<br>(55.2)  | 39<br>(52.7)         | 50<br>(53.2)   | 48<br>(57.8)   | 45<br>(53.6)   | 69<br>(57.5)                | 53<br>(50.5)   | 67<br>(54.0)   | 69<br>(57.5)   | 61<br>(57.0)         | 57<br>(57.0)   | 47<br>(50.5)   | 57<br>(60.0)   |
| Female                       | 537<br>(44.8)  | 35<br>(47.3)         | 44<br>(46.8)   | 35<br>(42.2)   | 39<br>(46.4)   | 51<br>(42.5)                | 52<br>(49.5)   | 57<br>(46.0)   | 51<br>(42.5)   | 46<br>(43.0)         | 43<br>(43.0)   | 46<br>(49.5)   | 38<br>(40.0)   |
| Diabetes duration, years     | 7.4<br>(5.7)   | 6.7<br>(4.6)         | 7.0<br>(6.2)   | 8.0<br>(5.9)   | 8.0<br>(6.5)   | 7.8<br>(6.1)                | 6.9<br>(4.8)   | 6.3<br>(5.0)   | 7.4<br>(5.5)   | 8.3<br>(6.5)         | 7.1<br>(5.5)   | 7.9<br>(6.1)   | 7.6<br>(5.0)   |
| HbA <sub>1c</sub> , %        | 8.2<br>(0.9)   | 7.3<br>(0.2)         | 7.2<br>(0.2)   | 7.2<br>(0.2)   | 7.2<br>(0.2)   | 8.0<br>(0.3)                | 8.0<br>(0.3)   | 8.0<br>(0.3)   | 8.0<br>(0.3)   | 9.4<br>(0.6)         | 9.3<br>(0.5)   | 9.4<br>(0.6)   | 9.3<br>(0.5)   |
| HbA <sub>1c</sub> , mmol/mol | 66.4<br>(10.0) | 55.8<br>(2.4)        | 55.4<br>(2.3)  | 55.6<br>(2.3)  | 55.7<br>(2.3)  | 64.0<br>(3.1)               | 63.5<br>(2.9)  | 63.9<br>(3.0)  | 64.1<br>(3.1)  | 79.4<br>(6.5)        | 77.7<br>(5.8)  | 78.7<br>(6.6)  | 78.0<br>(5.7)  |
| Body weight, kg              | 95.2<br>(22.6) | 99.1<br>(24.1)       | 96.9<br>(21.9) | 97.9<br>(24.3) | 93.0<br>(21.5) | 97.4<br>(22.9)              | 94.8<br>(23.0) | 94.8<br>(18.9) | 93.8<br>(21.5) | 93.4<br>(26.1)       | 95.3<br>(24.2) | 94.3<br>(20.3) | 93.3<br>(22.7) |
| BMI, kg/m <sup>2</sup>       | 33.5<br>(6.8)  | 34.2<br>(6.9)        | 34.0<br>(6.3)  | 34.6<br>(8.3)  | 33.4<br>(6.7)  | 34.1<br>(6.7)               | 33.4<br>(7.4)  | 33.1<br>(4.9)  | 33.1<br>(6.7)  | 32.8<br>(7.7)        | 33.5<br>(7.0)  | 33.4<br>(6.5)  | 32.8<br>(6.3)  |
| Race, n (%)                  |                |                      |                |                |                |                             |                |                |                |                      |                |                |                |
| Asian                        | 191<br>(15.9)  | 5<br>(6.8)           | 12<br>(12.8)   | 12<br>(14.5)   | 17<br>(20.2)   | 18<br>(15.0)                | 15<br>(14.3)   | 13<br>(10.5)   | 23<br>(19.2)   | 27<br>(25.2)         | 21<br>(21.0)   | 13<br>(14.0)   | 15<br>(15.8)   |
| Black/African American       | 70<br>(5.8)    | 8<br>(10.8)          | 6<br>(6.4)     | 8<br>(9.6)     | 6<br>(7.1)     | 5<br>(4.2)                  | 6<br>(5.7)     | 6<br>(4.8)     | 9<br>(7.5)     | 4<br>(3.7)           | 5<br>(5.0)     | 4<br>(4.3)     | 3<br>(3.2)     |
| White                        | 928<br>(77.4)  | 61<br>(82.4)         | 76<br>(80.9)   | 63<br>(75.9)   | 60<br>(71.4)   | 96<br>(80.0)                | 84<br>(80.0)   | 105<br>(84.7)  | 87<br>(72.5)   | 76<br>(71.0)         | 72<br>(72.0)   | 75<br>(80.6)   | 73<br>(76.8)   |
| Other                        | 10<br>(0.8)    | 0                    | 0              | 0              | 1<br>(1.2)     | 1<br>(0.8)                  | 0              | 0              | 1<br>(0.8)     | 0                    | 2<br>(2.0)     | 1<br>(1.1)     | 4<br>(4.2)     |

1  
2  
3  
4  
5  
6  
7  
8  
9  
10  
11  
12  
13  
14  
15  
16  
17  
18  
19  
20  
21  
22  
23  
24  
25  
26  
27  
28  
29  
30  
31  
32  
33  
34  
35  
36  
37  
38  
39  
40  
41  
42  
43  
44  
45  
46  
47

|                     |                 |              |              |              |              |               |              |               |               |              |              |              |              |
|---------------------|-----------------|--------------|--------------|--------------|--------------|---------------|--------------|---------------|---------------|--------------|--------------|--------------|--------------|
| Ethnic group, n (%) |                 |              |              |              |              |               |              |               |               |              |              |              |              |
| Hispanic/Latino     | 138<br>(11.5)   | 6<br>(8.1)   | 8<br>(8.5)   | 8<br>(9.6)   | 7<br>(8.3)   | 8<br>(6.7)    | 8<br>(7.6)   | 15<br>(12.1)  | 15<br>(12.5)  | 15<br>(14.0) | 15<br>(15.0) | 12<br>(12.9) | 21<br>(22.1) |
| Non-Hispanic/Latino | 1,061<br>(88.5) | 68<br>(91.9) | 86<br>(91.5) | 75<br>(90.4) | 77<br>(91.7) | 112<br>(93.3) | 97<br>(92.4) | 109<br>(87.9) | 105<br>(87.5) | 92<br>(86.0) | 85<br>(85.0) | 81<br>(87.1) | 74<br>(77.9) |

'On-treatment without rescue medication' data. Subgroup data are presented as mean (standard deviation) unless otherwise indicated. BMI, body mass index; Dula, dulaglutide; n, number of subjects randomised and exposed to at least one dose of trial product as randomised (full analysis set); Sema, semaglutide.

For peer review only

**Supplementary Table 4. Baseline characteristics of subjects with BMI <25 kg/m<sup>2</sup> at baseline**

|                              | All subjects | Sema 0.5 mg | Dula 0.75 mg | Sema 1.0 mg | Dula 1.5 mg |
|------------------------------|--------------|-------------|--------------|-------------|-------------|
| <b>n</b>                     | <b>1,199</b> | <b>24</b>   | <b>19</b>    | <b>16</b>   | <b>28</b>   |
| Age, years                   | 56 (10.6)    | 56.9 (10.0) | 51.2 (12.1)  | 61.8 (11.5) | 56.8 (11.8) |
| Sex, N (%)                   |              |             |              |             |             |
| Male                         | 662 (55.2)   | 15 (62.5)   | 13 (68.4)    | 8 (50.0)    | 18 (64.3)   |
| Female                       | 537 (44.8)   | 9 (37.5)    | 6 (31.6)     | 8 (50.0)    | 10 (35.7)   |
| Diabetes duration, years     | 7.4 (5.7)    | 6.8 (6.4)   | 7.8 (6.6)    | 12.2 (9.2)  | 7.3 (5.7)   |
| HbA <sub>1c</sub> , %        | 8.2 (0.9)    | 8.8 (1.1)   | 8.5 (0.8)    | 8.4 (1.1)   | 8.3 (1.1)   |
| HbA <sub>1c</sub> , mmol/mol | 66.4 (10.0)  | 72.4 (11.5) | 69.6 (8.6)   | 68.2 (12.1) | 67.6 (11.5) |
| Body weight, kg              | 95.2 (22.6)  | 62.9 (8.2)  | 61.8 (9.7)   | 64.5 (8.4)  | 62.4 (7.8)  |
| BMI, kg/m <sup>2</sup>       | 33.5 (6.8)   | 23.0 (1.6)  | 23.1 (1.6)   | 23.4 (1.6)  | 23.1 (1.2)  |
| Race, n (%)                  |              |             |              |             |             |
| Asian                        | 191 (15.9)   | 17 (70.8)   | 9 (47.4)     | 7 (43.8)    | 16 (57.1)   |
| Black/African American       | 70 (5.8)     | 0           | 0            | 0 (0)       | 1 (3.6)     |
| White                        | 928 (77.4)   | 7 (29.2)    | 10 (52.6)    | 9 (56.3)    | 11 (39.3)   |
| Other                        | 10 (0.8)     | 0           | 0            | 0 (0)       | 0 (0)       |
| Ethnic group, n (%)          |              |             |              |             |             |
| Hispanic/Latino              | 138 (11.5)   | 2 (8.3)     | 5 (26.3)     | 3 (18.8)    | 3 (10.7)    |
| Non-Hispanic/Latino          | 1,061 (88.5) | 22 (91.7)   | 14 (73.7)    | 13 (81.3)   | 25 (89.3)   |

'On-treatment without rescue medication' data. Subgroup data are presented as mean (standard deviation) unless otherwise indicated. BMI, body mass index; Dula, dulaglutide; HbA<sub>1c</sub>, glycosylated haemoglobin; n, number of subjects randomised and exposed to at least one dose of trial product as randomised (full analysis set); Sema, semaglutide.

1  
2  
3  
4  
5  
6  
7  
8  
9  
10  
11  
12  
13  
14  
15  
16  
17  
18  
19  
20  
21  
22  
23  
24  
25  
26  
27  
28  
29  
30  
31  
32  
33  
34  
35  
36  
37  
38  
39  
40  
41  
42  
43  
44  
45  
46  
47  
48  
49  
50  
51  
52  
53  
54  
55  
56  
57  
58  
59  
60

**SUPPLEMENTARY SECTION II : GLYCAEMIC TARGETS & WEIGHT-LOSS RESPONSES**

For peer review only

Supplementary Figure 1. Change from baseline in HbA<sub>1c</sub> (A, C, E, G, I) and body weight (B, D, F, H, J) at week 40 by age (A, B), sex (C, D), diabetes duration (E, F), HbA<sub>1c</sub> (G, H) and BMI (I, J) at baseline.

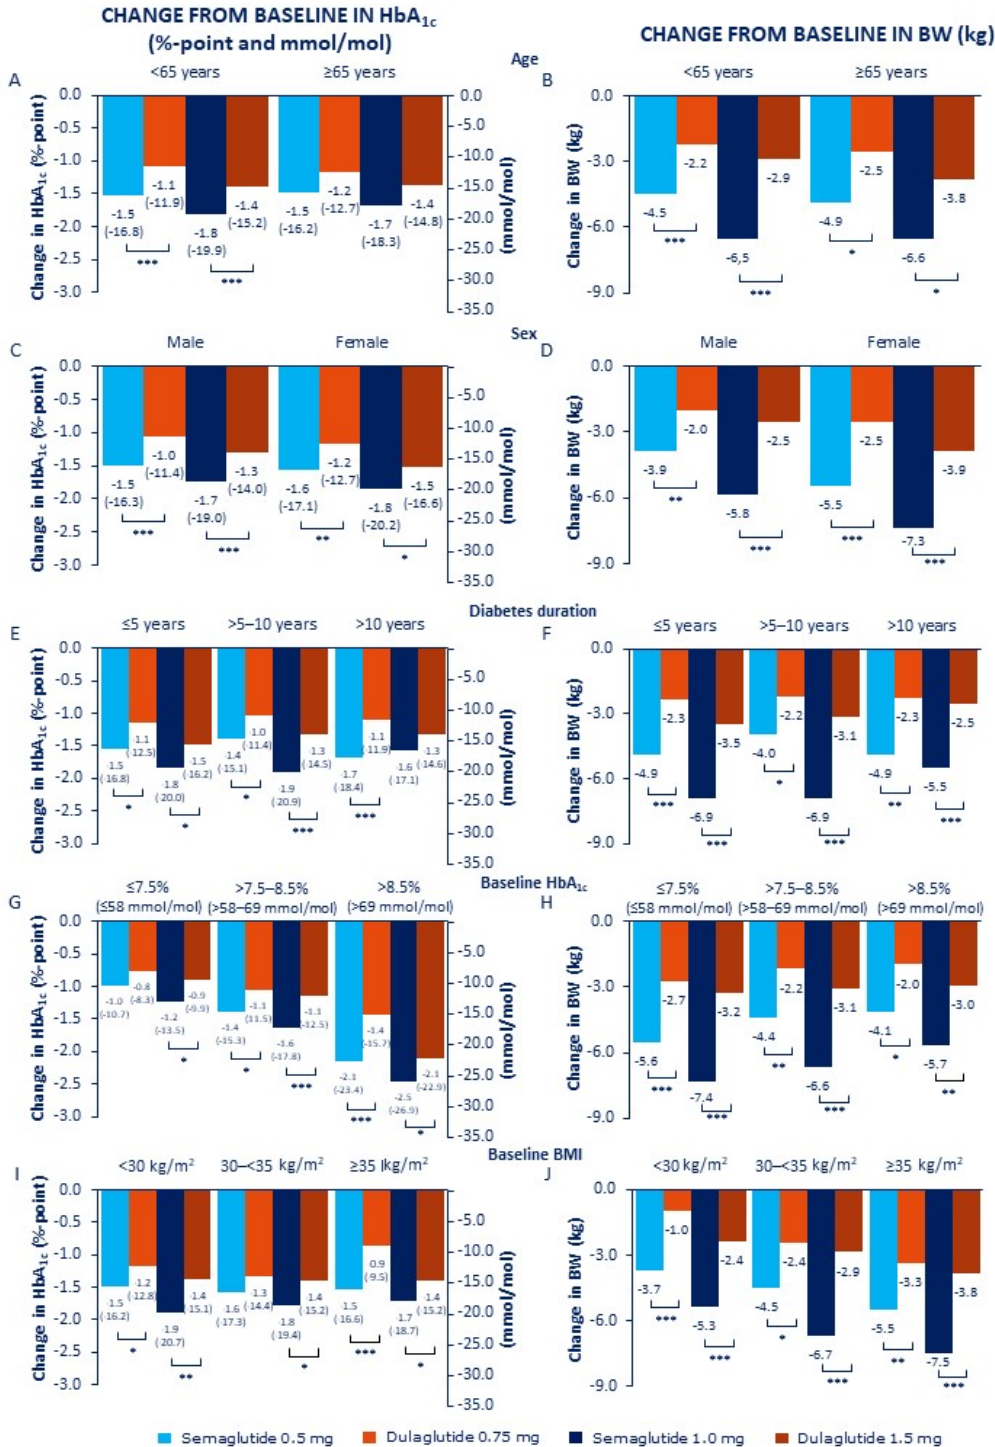

1  
2  
3 \*p<0.05, \*\*p<0.001, \*\*\*p<0.0001. Values are estimated means from ANCOVAs controlled for baseline HbA<sub>1c</sub>  
4 (A, C, E, G, I) or BW (B, D, F, H, I) with multiple imputations using data from all randomised subjects exposed to  
5 at least one dose of trial product and did not discontinue treatment or receive any non-investigational  
6 antihyperglycaemic treatment (full analysis set) obtained while on treatment and prior to onset of rescue  
7 medication. P-values are based on ETDs; statistical analyses were not performed for change from baseline.  
8 ANCOVA, analysis of covariance; BMI, body mass index; BW, body weight; ETD, estimated treatment difference;  
9 HbA<sub>1c</sub>, glycated haemoglobin.  
10  
11  
12  
13  
14  
15  
16  
17  
18  
19  
20  
21  
22  
23  
24  
25  
26  
27  
28  
29  
30  
31  
32  
33  
34  
35  
36  
37  
38  
39  
40  
41  
42  
43  
44  
45  
46  
47  
48  
49  
50  
51  
52  
53  
54  
55  
56  
57  
58  
59  
60

**Supplementary Figure 2. Proportion of subjects achieving HbA<sub>1c</sub> < 7.0% (53 mmol/mol; A, C, E, G and I) and HbA<sub>1c</sub> ≤6.5% (48 mmol/mol; B, D, F, H and J) at 40 weeks**

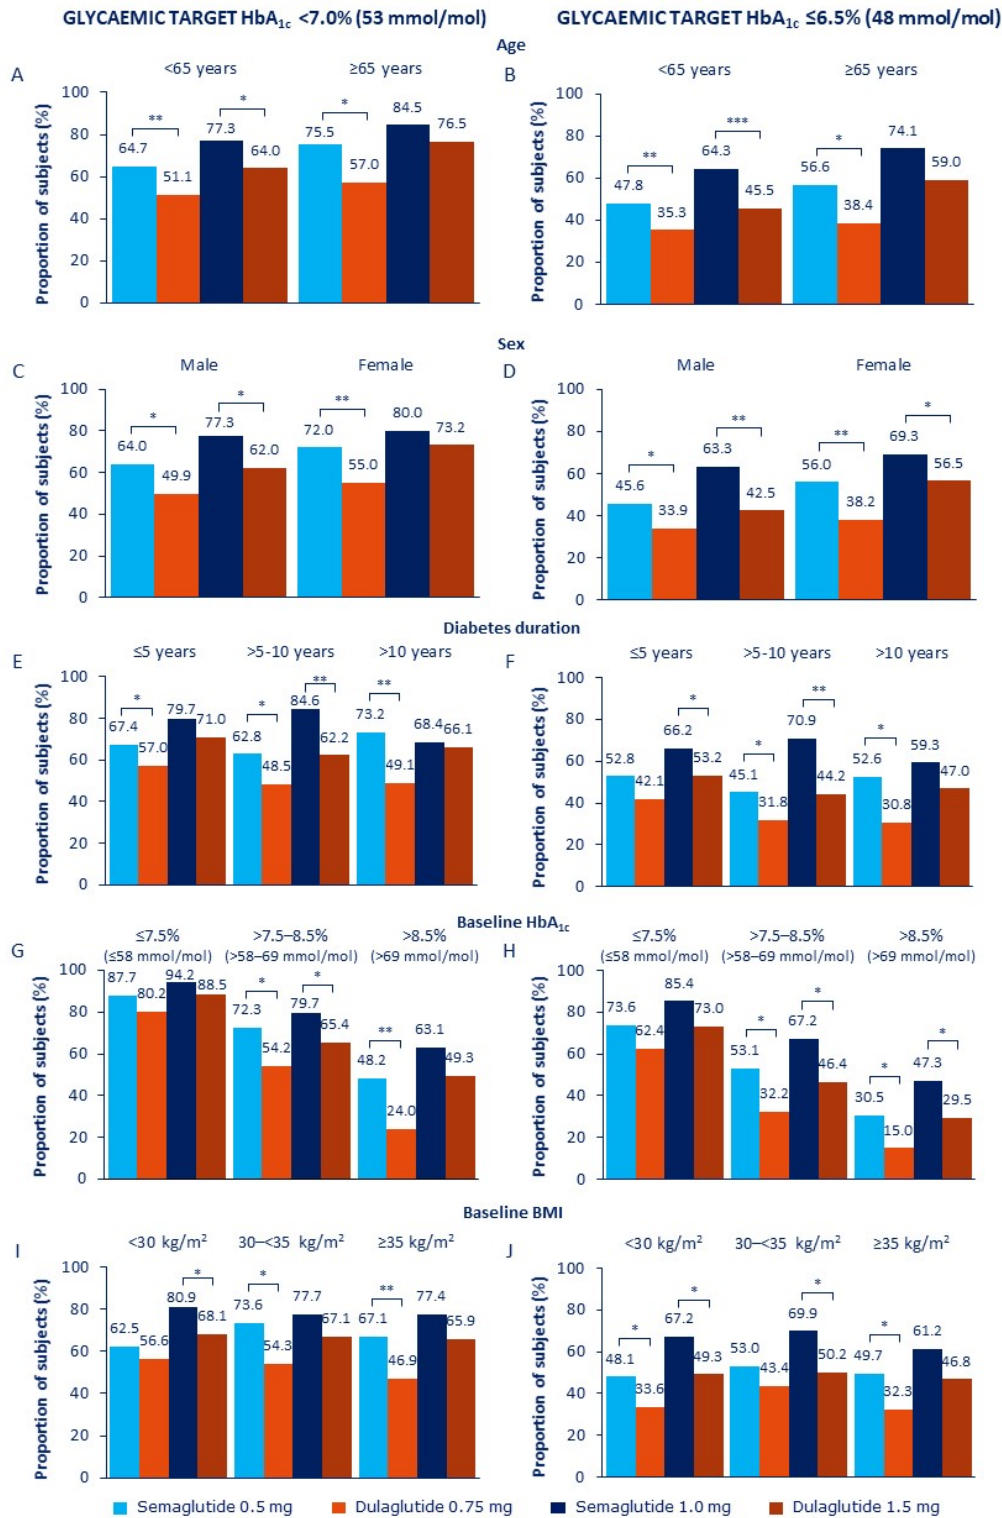



1  
2  
3 \*p<0.05, \*\*p<0.001, \*\*\*p<0.0001. Values are estimated proportions from ANCOVAs with multiple imputations  
4 using 'on-treatment without rescue medication' data from all randomised subjects exposed to at least one dose of  
5 trial product as randomised (full analysis set) obtained while on treatment and prior to onset of rescue medication.  
6 ANCOVA, analysis of covariance; BMI, body mass index; BW, body weight; HbA<sub>1c</sub>, glycated haemoglobin.  
7  
8  
9  
10  
11  
12  
13  
14  
15  
16  
17  
18  
19  
20  
21  
22  
23  
24  
25  
26  
27  
28  
29  
30  
31  
32  
33  
34  
35  
36  
37  
38  
39  
40  
41  
42  
43  
44  
45  
46  
47  
48  
49  
50  
51  
52  
53  
54  
55  
56  
57  
58  
59  
60

For peer review only

**Supplementary Figure 3. Proportion of subjects achieving weight loss  $\geq 5\%$  (A, C, E, G and I) and weight loss  $\geq 10\%$  (B, D, F, H and J) at 40 weeks**

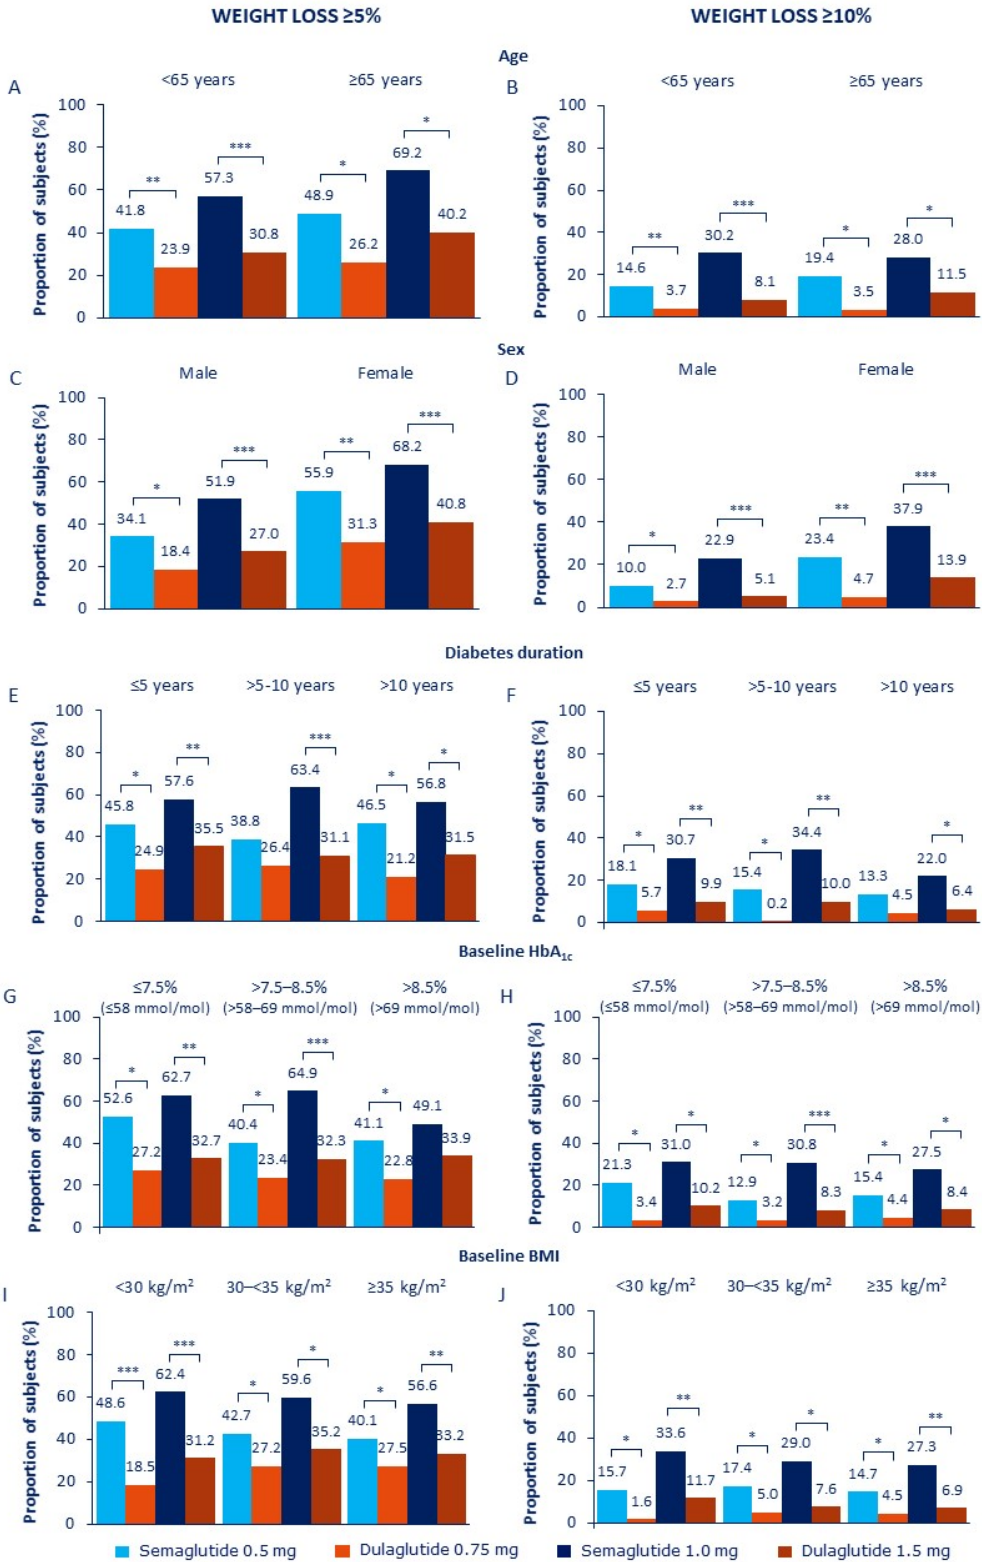

1  
2  
3 \*p<0.05, \*\*p<0.001, \*\*\*p<0.0001. Values are estimated proportions from ANCOVAs with multiple imputations  
4 using 'on-treatment without rescue medication' data from all randomised subjects exposed to at least one dose of  
5 trial product as randomised (full analysis set) obtained while on treatment and prior to onset of rescue medication.  
6 P-values are based on ETDs; statistical analyses were not performed for change from baseline. ANCOVA, analysis  
7 of covariance; BMI, body mass index; ETD, estimated treatment difference; BW, body weight.  
8  
9  
10  
11  
12  
13  
14  
15  
16  
17  
18  
19  
20  
21  
22  
23  
24  
25  
26  
27  
28  
29  
30  
31  
32  
33  
34  
35  
36  
37  
38  
39  
40  
41  
42  
43  
44  
45  
46  
47  
48  
49  
50  
51  
52  
53  
54  
55  
56  
57  
58  
59  
60

**Supplementary Figure 4. Odds ratios for the proportion of subjects achieving HbA<sub>1c</sub> <7.0% (53 mmol/mol; A) and HbA<sub>1c</sub> ≤6.5% (48 mmol/mol; B) at 40 weeks by age, sex, diabetes duration, HbA<sub>1c</sub> and BMI at baseline**

(A)

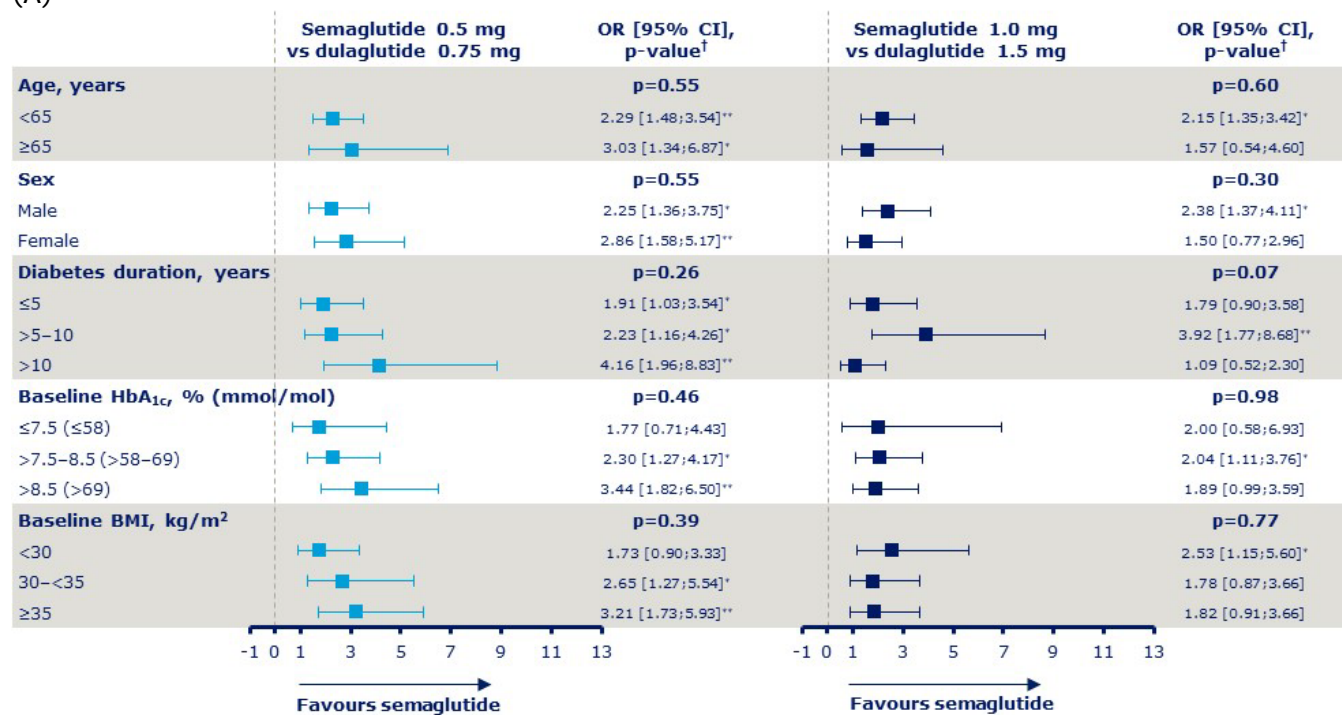

(B)

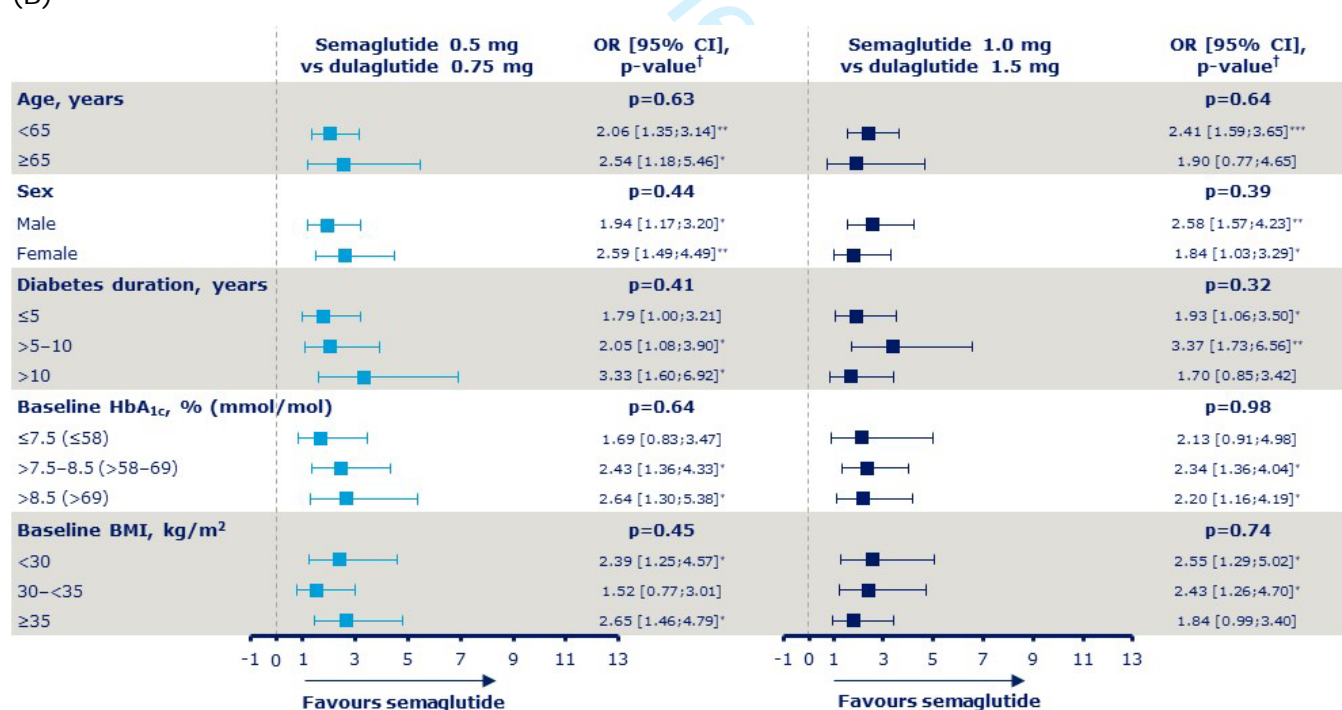

\*p<0.05, \*\*p<0.001, \*\*\*p<0.0001; <sup>†</sup>p-values represent the test for treatment by subgroup interaction. Values are ORs [95% CIs] from ANCOVAs with multiple imputations using 'on-treatment without rescue medication' data

1  
2  
3 from all randomised subjects exposed to at least one dose of trial product as randomised (full analysis set)  
4 obtained while on treatment and prior to onset of rescue medication. ANCOVA controlled for baseline HbA<sub>1c</sub> and  
5 interaction between randomised treatment and subgroup. ANCOVA, analysis of covariance; BMI, body mass index;  
6 CI, confidence interval; HbA<sub>1c</sub>, glycated haemoglobin; OR, odds ratio.  
7  
8  
9  
10  
11  
12  
13  
14  
15  
16  
17  
18  
19  
20  
21  
22  
23  
24  
25  
26  
27  
28  
29  
30  
31  
32  
33  
34  
35  
36  
37  
38  
39  
40  
41  
42  
43  
44  
45  
46  
47  
48  
49  
50  
51  
52  
53  
54  
55  
56  
57  
58  
59  
60

For peer review only

**Supplementary Figure 5. Odds ratios for the proportion of subjects achieving weight loss  $\geq 5\%$  (A) and weight loss  $\geq 10\%$  (B) at 40 weeks by age, sex, diabetes duration, HbA<sub>1c</sub> and BMI at baseline**

(A)

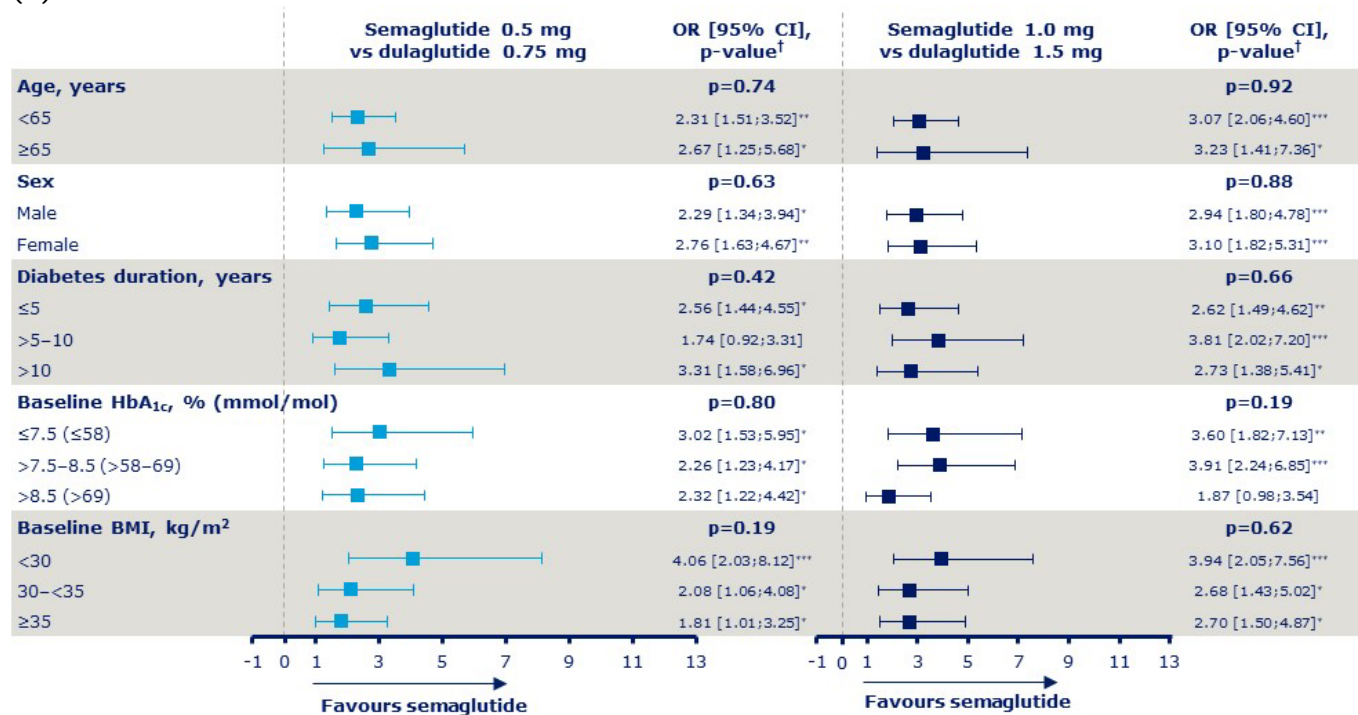

(B)

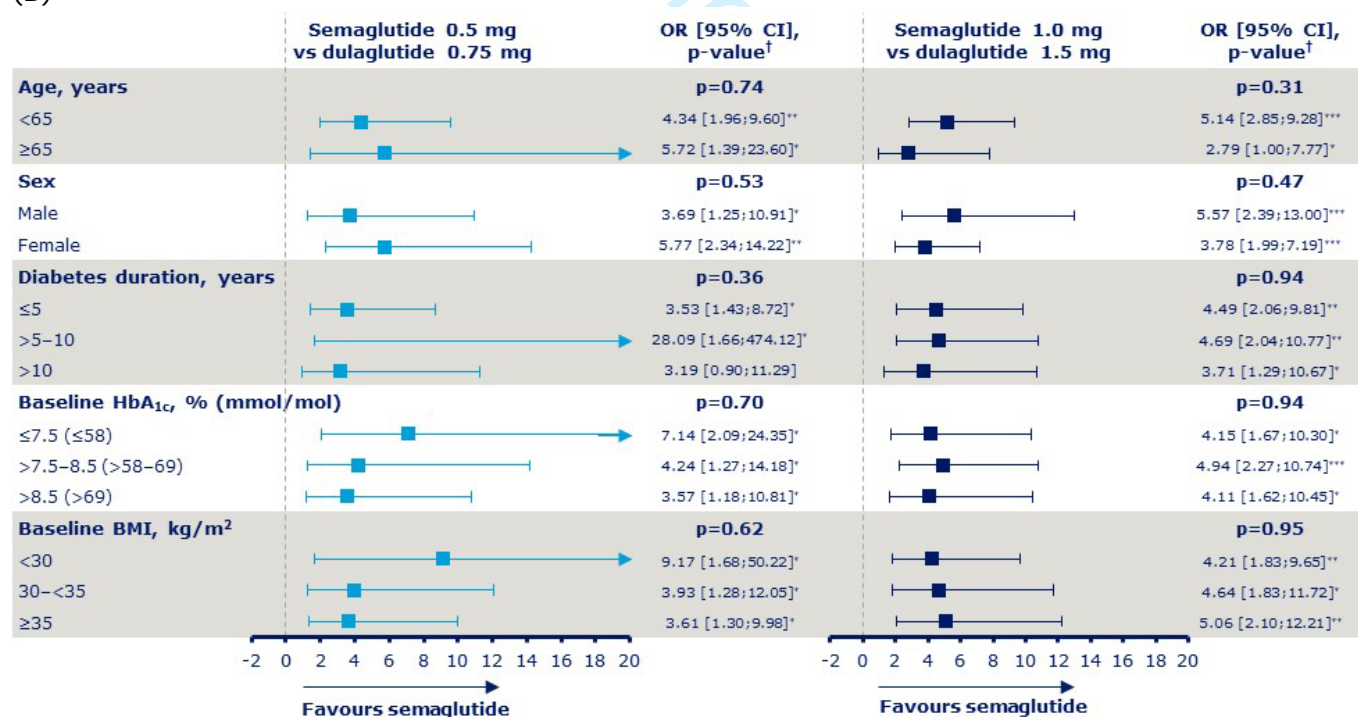



1  
2  
3 \*p<0.05, \*\*p<0.001, \*\*\*p<0.0001; <sup>†</sup>p-values represent the test for treatment by subgroup interaction. Values  
4 are ORs [95% CIs] from ANCOVA analyses with multiple imputations using 'on-treatment without rescue  
5 medication' data from all randomised subjects exposed to at least one dose of trial product as randomised (full  
6 analysis set) obtained while on treatment and prior to onset of rescue medication. ANCOVA controlled for baseline  
7 HbA<sub>1c</sub> and interaction between randomised treatment and subgroup. ANCOVA, analysis of covariance; BMI, body  
8 mass index; CI, confidence interval; HbA<sub>1c</sub>, glycated haemoglobin; OR, odds ratio.  
9  
10  
11  
12  
13  
14  
15  
16  
17  
18  
19  
20  
21  
22  
23  
24  
25  
26  
27  
28  
29  
30  
31  
32  
33  
34  
35  
36  
37  
38  
39  
40  
41  
42  
43  
44  
45  
46  
47  
48  
49  
50  
51  
52  
53  
54  
55  
56  
57  
58  
59  
60

Supplementary Figure 6: Change in body weight (%) from baseline to week 40 by baseline BMI category

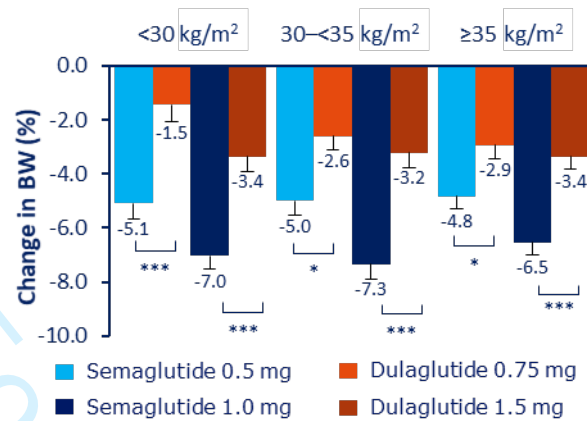

\*p<0.05, \*\*\*p<0.0001. Values are estimated means from ANCOVAs with multiple imputations using 'on-treatment without rescue medication' data from all randomised subjects exposed to at least one dose of trial product as randomised (full analysis set) obtained while on treatment and prior to onset of rescue medication. ANCOVA, analysis of covariance; BMI, body mass index; BW, body weight.



1  
2  
3  
4  
5  
6  
7  
8  
9  
10  
11  
12  
13  
14  
15  
16  
17  
18  
19  
20  
21  
22  
23  
24  
25  
26  
27  
28  
29  
30  
31  
32  
33  
34  
35  
36  
37  
38  
39  
40  
41  
42  
43  
44  
45  
46  
47  
48  
49  
50  
51  
52  
53  
54  
55  
56  
57  
58  
59  
60

**SUPPLEMENTARY SECTION III: ADVERSE EVENTS**

For peer review only

**Supplementary Table 5. Adverse events by sex subgroups**

| n (%)                                                               | All subjects  | Male          |              |               |               | Female       |              |              |              |
|---------------------------------------------------------------------|---------------|---------------|--------------|---------------|---------------|--------------|--------------|--------------|--------------|
|                                                                     |               | Sema 0.5 mg   | Dula 0.75 mg | Sema 1.0 mg   | Dula 1.5 mg   | Sema 0.5 mg  | Dula 0.75 mg | Sema 1.0 mg  | Dula 1.5 mg  |
|                                                                     | <b>1,199</b>  | <b>169</b>    | <b>160</b>   | <b>162</b>    | <b>171</b>    | <b>132</b>   | <b>139</b>   | <b>138</b>   | <b>128</b>   |
| AEs                                                                 | 818<br>(68.2) | 111<br>(65.7) | 97<br>(60.6) | 113<br>(69.8) | 129<br>(75.4) | 93<br>(70.5) | 89<br>(64.0) | 94<br>(68.1) | 92<br>(71.9) |
| Serious AEs                                                         | 86<br>(7.2)   | 11<br>(6.5)   | 15<br>(9.4)  | 10<br>(6.2)   | 12<br>(7.0)   | 6<br>(4.5)   | 9<br>(6.5)   | 13<br>(9.4)  | 10<br>(7.8)  |
| AEs leading to premature treatment discontinuation                  | 87<br>(7.3)   | 13<br>(7.7)   | 8<br>(5.0)   | 15<br>(9.3)   | 12<br>(7.0)   | 11<br>(8.3)  | 6<br>(4.3)   | 14<br>(10.1) | 8<br>(6.3)   |
| Gastrointestinal AEs leading to premature treatment discontinuation | 54<br>(4.5)   | 8<br>(4.7)    | 1<br>(0.6)   | 9<br>(5.6)    | 8<br>(4.7)    | 8<br>(6.1)   | 5<br>(3.6)   | 9<br>(6.5)   | 6<br>(4.8)   |
| Gastrointestinal AEs                                                | 505<br>(42.1) | 67<br>(39.6)  | 47<br>(29.4) | 67<br>(41.4)  | 81<br>(47.4)  | 62<br>(47.0) | 53<br>(38.1) | 66<br>(47.8) | 62<br>(48.4) |
| Vomiting                                                            | 103<br>(8.6)  | 13<br>(7.7)   | 5<br>(3.1)   | 11<br>(6.8)   | 16<br>(9.4)   | 18<br>(13.6) | 7<br>(5.0)   | 20<br>(14.5) | 13<br>(10.2) |
| Nausea                                                              | 230<br>(19.2) | 29<br>(17.2)  | 13<br>(8.1)  | 25<br>(15.4)  | 33<br>(19.3)  | 39<br>(29.5) | 26<br>(18.7) | 38<br>(27.5) | 27<br>(21.1) |
| Diarrhoea                                                           | 160<br>(13.3) | 21<br>(12.4)  | 10<br>(6.3)  | 19<br>(11.7)  | 33<br>(19.3)  | 22<br>(16.7) | 13<br>(9.4)  | 22<br>(15.9) | 20<br>(15.6) |
| Hypoglycaemia (severe/BG-confirmed)                                 | 15<br>(1.3)   | 1<br>(0.6)    | 3<br>(1.9)   | 3<br>(1.9)    | 3<br>(1.8)    | 1<br>(0.8)   | 0            | 2<br>(1.4)   | 2<br>(1.6)   |

Data are presented as number and proportion in percent of subjects with adverse events. Hypoglycaemia was defined as an episode that was severe (according to the American Diabetes Association classification) or BG-confirmed (plasma glucose value <56 mg/dL [3.1 mmol/L]) with symptoms consistent with hypoglycaemia. AE, adverse event; BG, blood glucose; Dula, dulaglutide; n, number of subjects randomised and exposed to at least one dose of trial product as treated (safety analysis set); Sema, semaglutide.

**Supplementary Table 6. Adverse events by diabetes duration subgroups**

| n (%)                                                               | All subjects  | ≤5 years     |              |              |              | >5–10 years  |              |              |              | >10 years    |              |              |              |
|---------------------------------------------------------------------|---------------|--------------|--------------|--------------|--------------|--------------|--------------|--------------|--------------|--------------|--------------|--------------|--------------|
|                                                                     |               | Sema 0.5 mg  | Dula 0.75 mg | Sema 1.0 mg  | Dula 1.5 mg  | Sema 0.5 mg  | Dula 0.75 mg | Sema 1.0 mg  | Dula 1.5 mg  | Sema 0.5 mg  | Dula 0.75 mg | Sema 1.0 mg  | Dula 1.5 mg  |
|                                                                     | <b>1,199</b>  | <b>113</b>   | <b>128</b>   | <b>122</b>   | <b>114</b>   | <b>101</b>   | <b>94</b>    | <b>103</b>   | <b>92</b>    | <b>87</b>    | <b>77</b>    | <b>75</b>    | <b>93</b>    |
| AEs                                                                 | 818<br>(68.2) | 76<br>(67.3) | 81<br>(63.3) | 79<br>(64.8) | 76<br>(66.7) | 66<br>(65.3) | 52<br>(55.3) | 74<br>(71.8) | 73<br>(79.3) | 62<br>(71.3) | 53<br>(68.8) | 54<br>(72.0) | 72<br>(77.4) |
| Serious AEs                                                         | 86<br>(7.2)   | 5<br>(4.4)   | 9<br>(7.0)   | 10<br>(8.2)  | 9<br>(7.9)   | 4<br>(4.0)   | 6<br>(6.4)   | 7<br>(6.8)   | 6<br>(6.5)   | 8<br>(9.2)   | 9<br>(11.7)  | 6<br>(8.0)   | 7<br>(7.5)   |
| AEs leading to premature treatment discontinuation                  | 87<br>(7.3)   | 9<br>(8.0)   | 3<br>(2.3)   | 9<br>(7.4)   | 5<br>(4.4)   | 10<br>(9.9)  | 5<br>(5.3)   | 9<br>(8.7)   | 8<br>(8.7)   | 5<br>(5.7)   | 6<br>(7.8)   | 11<br>(14.7) | 7<br>(7.5)   |
| Gastrointestinal AEs leading to premature treatment discontinuation | 54<br>(4.5)   | 7<br>(6.2)   | 1<br>(0.8)   | 6<br>(4.9)   | 3<br>(2.6)   | 6<br>(5.9)   | 1<br>(1.1)   | 5<br>(4.9)   | 5<br>(5.4)   | 3<br>(3.4)   | 4<br>(5.2)   | 7<br>(9.3)   | 6<br>(6.5)   |
| Gastrointestinal AEs                                                | 505<br>(42.1) | 52<br>(46.0) | 44<br>(34.4) | 57<br>(46.7) | 52<br>(45.6) | 44<br>(43.6) | 26<br>(27.7) | 42<br>(40.8) | 48<br>(52.2) | 33<br>(37.9) | 30<br>(39.0) | 34<br>(45.3) | 43<br>(46.2) |
| Vomiting                                                            | 103<br>(8.6)  | 14<br>(12.4) | 5<br>(3.9)   | 18<br>(14.8) | 8<br>(7.0)   | 10<br>(9.9)  | 4<br>(4.3)   | 6<br>(5.8)   | 9<br>(9.8)   | 7<br>(8.0)   | 3<br>(3.9)   | 7<br>(9.3)   | 12<br>(12.9) |
| Nausea                                                              | 230<br>(19.2) | 25<br>(22.1) | 17<br>(13.3) | 24<br>(19.7) | 21<br>(18.4) | 22<br>(21.8) | 10<br>(10.6) | 24<br>(23.3) | 20<br>(21.7) | 21<br>(24.1) | 12<br>(15.6) | 15<br>(20.0) | 19<br>(20.4) |
| Diarrhoea                                                           | 160<br>(13.3) | 16<br>(14.2) | 14<br>(10.9) | 22<br>(18.0) | 20<br>(17.5) | 18<br>(17.8) | 4<br>(4.3)   | 11<br>(10.7) | 18<br>(19.6) | 9<br>(10.3)  | 5<br>(6.5)   | 8<br>(10.7)  | 15<br>(16.1) |
| Hypoglycaemia (severe/BG-confirmed)                                 | 15<br>(1.3)   | 0            | 1<br>(0.8)   | 2<br>(1.6)   | 2<br>(1.8)   | 0            | 0            | 2<br>(1.9)   | 2<br>(2.2)   | 2<br>(2.3)   | 2<br>(2.6)   | 1<br>(1.3)   | 1<br>(1.1)   |

Data are presented as number and proportion in percent of subjects with adverse events. Hypoglycaemia was defined as an episode that was severe (according to the American Diabetes Association classification) or BG-confirmed (plasma glucose value <56 mg/dL [3.1 mmol/L]) with symptoms consistent with hypoglycaemia. AE, adverse event; BG, blood glucose; Dula, dulaglutide; n, number of subjects randomised and exposed to at least one dose of trial product as treated (safety analysis set); Sema, semaglutide.

**Supplementary Table 7. Adverse events by baseline HbA<sub>1c</sub> subgroups**

| n (%)                                                               | All subjects  | ≤7.5% (≤58 mmol/mol) |              |              |              | >7.5–8.5% (>58–69 mmol/mol) |              |              |              | >8.5% (>69 mmol/mol) |              |              |              |
|---------------------------------------------------------------------|---------------|----------------------|--------------|--------------|--------------|-----------------------------|--------------|--------------|--------------|----------------------|--------------|--------------|--------------|
|                                                                     |               | Sema 0.5 mg          | Dula 0.75 mg | Sema 1.0 mg  | Dula 1.5 mg  | Sema 0.5 mg                 | Dula 0.75 mg | Sema 1.0 mg  | Dula 1.5 mg  | Sema 0.5 mg          | Dula 0.75 mg | Sema 1.0 mg  | Dula 1.5 mg  |
|                                                                     | <b>1,199</b>  | <b>74</b>            | <b>94</b>    | <b>83</b>    | <b>84</b>    | <b>120</b>                  | <b>105</b>   | <b>124</b>   | <b>120</b>   | <b>107</b>           | <b>100</b>   | <b>93</b>    | <b>95</b>    |
| AEs                                                                 | 818<br>(68.2) | 51<br>(68.9)         | 62<br>(66.0) | 57<br>(68.7) | 66<br>(78.6) | 80<br>(66.7)                | 65<br>(61.9) | 83<br>(66.9) | 94<br>(78.3) | 73<br>(68.2)         | 59<br>(59.0) | 67<br>(72.0) | 61<br>(64.2) |
| Serious AEs                                                         | 86<br>(7.2)   | 3<br>(4.1)           | 9<br>(9.6)   | 6<br>(7.2)   | 3<br>(3.6)   | 7<br>(5.8)                  | 8<br>(7.6)   | 9<br>(7.3)   | 7<br>(5.8)   | 7<br>(6.5)           | 7<br>(7.0)   | 8<br>(8.6)   | 12<br>(12.6) |
| AEs leading to premature treatment discontinuation                  | 88<br>(7.3)   | 6<br>(8.1)           | 5<br>(5.3)   | 8<br>(9.6)   | 11<br>(13.1) | 11<br>(9.2)                 | 5<br>(4.8)   | 12<br>(9.7)  | 4<br>(3.3)   | 7<br>(6.5)           | 4<br>(4.0)   | 9<br>(9.7)   | 5<br>(5.3)   |
| Gastrointestinal AEs leading to premature treatment discontinuation | 54<br>(4.5)   | 5<br>(6.8)           | 2<br>(2.1)   | 6<br>(7.2)   | 9<br>(10.7)  | 6<br>(5.0)                  | 2<br>(1.9)   | 8<br>(6.5)   | 1<br>(0.8)   | 5<br>(4.7)           | 2<br>(2.0)   | 4<br>(4.3)   | 4<br>(4.2)   |
| Gastrointestinal AEs                                                | 505<br>(42.1) | 33<br>(44.6)         | 32<br>(34.0) | 38<br>(45.8) | 50<br>(59.5) | 52<br>(43.3)                | 40<br>(38.1) | 53<br>(42.7) | 55<br>(45.8) | 44<br>(41.1)         | 28<br>(28.0) | 42<br>(45.2) | 38<br>(40.0) |
| Vomiting                                                            | 103<br>(8.6)  | 7<br>(9.5)           | 5<br>(5.3)   | 8<br>(9.6)   | 7<br>(8.3)   | 14<br>(11.7)                | 2<br>(1.9)   | 14<br>(11.3) | 11<br>(9.2)  | 10<br>(9.3)          | 5<br>(5.0)   | 9<br>(9.7)   | 11<br>(11.6) |
| Nausea                                                              | 230<br>(19.2) | 16<br>(21.6)         | 11<br>(11.7) | 16<br>(19.3) | 19<br>(22.6) | 28<br>(23.3)                | 14<br>(13.3) | 28<br>(22.6) | 22<br>(18.3) | 24<br>(22.4)         | 14<br>(14.0) | 19<br>(20.4) | 19<br>(20.0) |
| Diarrhoea                                                           | 160<br>(13.3) | 12<br>(16.2)         | 6<br>(6.4)   | 14<br>(16.9) | 25<br>(29.8) | 20<br>(16.7)                | 11<br>(10.5) | 17<br>(13.7) | 17<br>(14.2) | 11<br>(10.3)         | 6<br>(6.0)   | 10<br>(10.8) | 11<br>(11.6) |
| Hypoglycaemia (severe/BG-confirmed)                                 | 15<br>(1.3)   | 0                    | 1<br>(1.1)   | 2<br>(2.4)   | 1<br>(1.2)   | 2<br>(1.7)                  | 1<br>(1.0)   | 1<br>(0.8)   | 2<br>(1.7)   | 0                    | 1<br>(1.0)   | 2<br>(2.2)   | 2<br>(2.1)   |

Data are presented as number and proportion in percent of subjects with adverse events. Hypoglycaemia was defined as an episode that was severe (according to the American Diabetes Association classification) or BG-confirmed (plasma glucose value <56 mg/dL [3.1 mmol/L]) with symptoms consistent with hypoglycaemia. AE, adverse event; BG, blood glucose; Dula, dulaglutide; n, number of subjects randomised and exposed to at least one dose of trial product as treated (safety analysis set); Sema, semaglutide.

**SUPPLEMENTARY SECTION IV: RESULTS IN SUBJECTS WITH BMI <25 kg/m<sup>2</sup>**

For peer review only

1  
2  
3  
4  
5  
6  
7  
8  
9  
10  
11  
12  
13  
14  
15  
16  
17  
18  
19  
20  
21  
22  
23  
24  
25  
26  
27  
28  
29  
30  
31  
32  
33  
34  
35  
36  
37  
38  
39  
40  
41  
42  
43  
44  
45  
46  
47

Supplementary Figure 7. Change in HbA<sub>1c</sub> (A) and body weight (B) from baseline to week 40 and the proportion of subjects achieving HbA<sub>1c</sub> <7.0% (53 mmol/mol; C), HbA<sub>1c</sub> ≤6.5% (48 mmol/mol; D), weight loss ≥5% (E) and weight loss ≥10% (F) in subjects with BMI <25 kg/m<sup>2</sup> at baseline

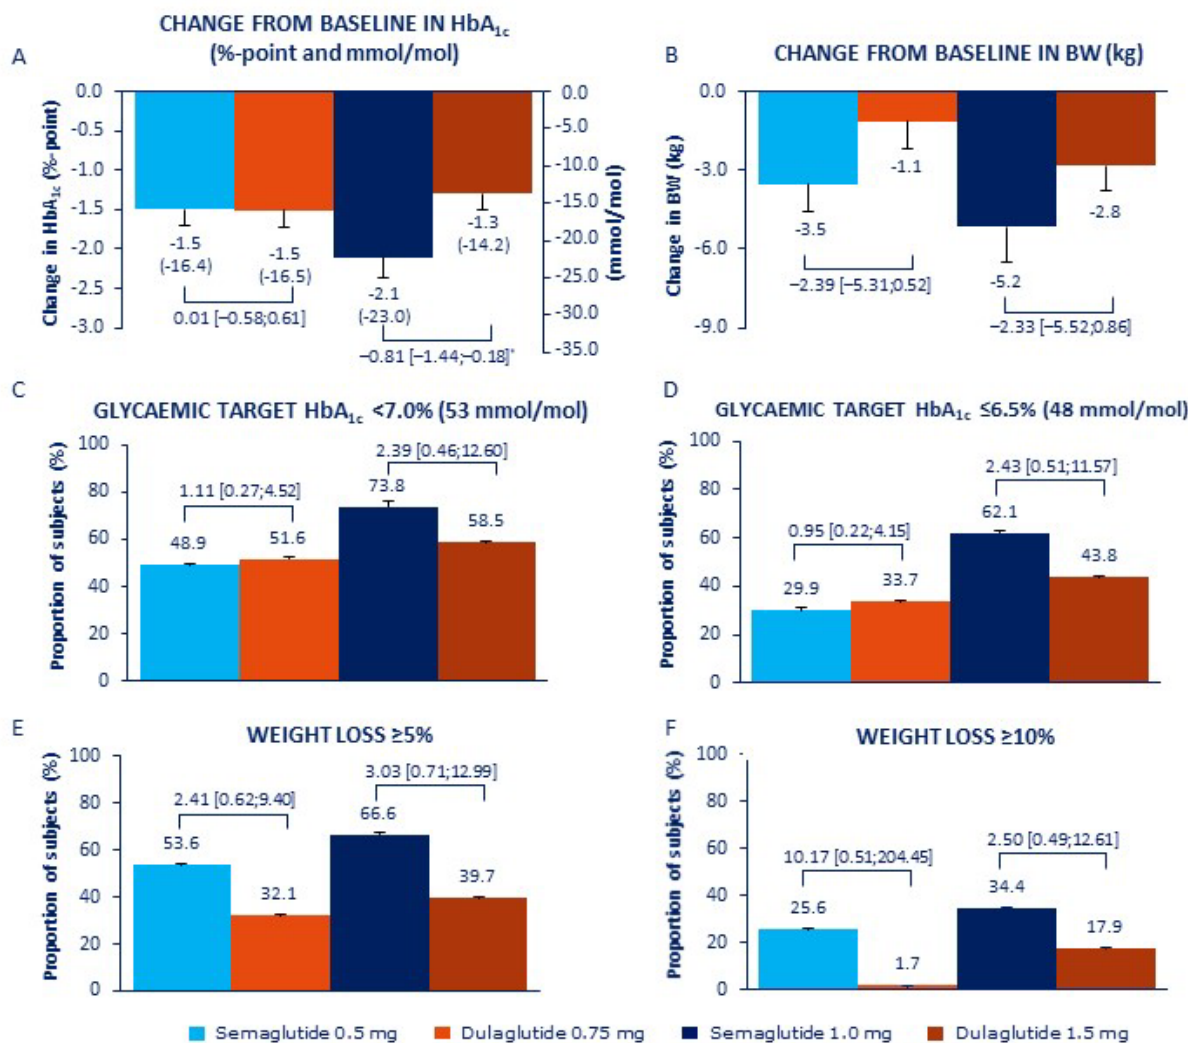

\*p<0.05. Values are estimated means (A, B), estimated proportions (C–F), ETDs [95% CIs] (A, B) or ORs [95% CIs] (C–F) from ANCOVAs with multiple imputations using ‘on-treatment without rescue medication’ data from all randomised subjects exposed to at least one dose of trial product as randomised (full analysis set). ANCOVA analyses were controlled for baseline HbA<sub>1c</sub> and interaction between randomised treatment and subgroup. ANCOVA, analysis of covariance; BMI, body mass index, BW, body weight; CI, confidence interval; ETD, estimated treatment difference; HbA<sub>1c</sub>, glycated haemoglobin; OR, odds ratio.

Supplementary Figure 8. Change in body weight (%) from baseline to week 40 in subjects with BMI <25 kg/m<sup>2</sup> at baseline

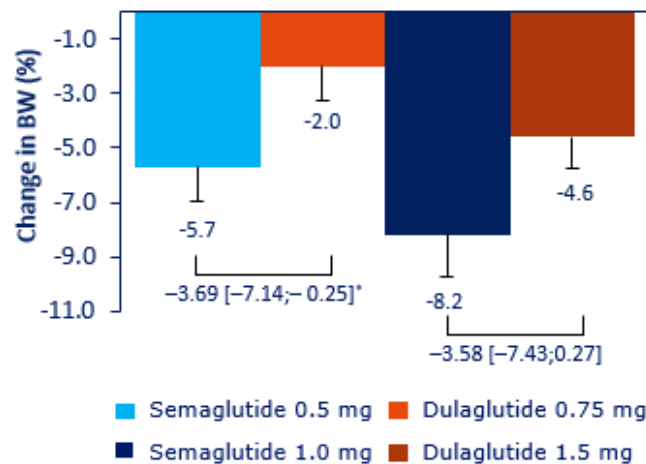

\*p<0.05. Values are estimated means from ANCOVAs with multiple imputations using 'on-treatment without rescue medication' data from all randomised subjects exposed to at least one dose of trial product as randomised (full analysis set). ANCOVAs were controlled for baseline HbA<sub>1c</sub> and interaction between randomised treatment and subgroup. ANCOVA, analysis of covariance; BMI, body mass index; BW, body weight; CI, confidence interval; ETD, estimated treatment difference.

**Supplementary Table 8. Adverse events in subjects with BMI <25 kg/m<sup>2</sup> at baseline**

| n (%)                                                               | All subjects | Sema 0.5 mg | Dula 0.75 mg | Sema 1.0 mg | Dula 1.5 mg |
|---------------------------------------------------------------------|--------------|-------------|--------------|-------------|-------------|
|                                                                     | <b>1,199</b> | <b>24</b>   | <b>19</b>    | <b>16</b>   | <b>28</b>   |
| AEs                                                                 | 818 (68.2)   | 18 (75.0)   | 14 (73.7)    | 12 (75.0)   | 23 (82.1)   |
| Serious AEs                                                         | 86 (7.2)     | 1 (4.2)     | 1 (5.3)      | 2 (12.5)    | 2 (7.1)     |
| AEs leading to premature treatment discontinuation                  | 87 (7.3)     | 5 (20.8)    | 2 (10.5)     | 4 (25.0)    | 6 (21.4)    |
| Gastrointestinal AEs leading to premature treatment discontinuation | 54 (4.5)     | 4 (16.7)    | 0            | 2 (12.5)    | 2 (7.1)     |
| Gastrointestinal AEs                                                | 505 (42.1)   | 14 (58.3)   | 6 (31.6)     | 10 (62.5)   | 17 (60.7)   |
| Vomiting                                                            | 103 (8.6)    | 6 (25.0)    | 1 (5.3)      | 2 (12.5)    | 3 (10.7)    |
| Nausea                                                              | 230 (19.2)   | 6 (25.0)    | 1 (5.3)      | 4 (25.0)    | 6 (21.4)    |
| Diarrhoea                                                           | 160 (13.3)   | 5 (20.8)    | 3 (15.8)     | 3 (18.8)    | 7 (25.0)    |
| Hypoglycaemia (severe/BG-confirmed)                                 | 15 (1.3)     | 0           | 1 (5.3)      | 0           | 1 (3.6)     |

Data are presented as number and proportion in percent of subjects with adverse events. Hypoglycaemia was defined as an episode that was severe (according to the American Diabetes Association classification) or BG-confirmed (plasma glucose value <56 mg/dL [3.1 mmol/L]) with symptoms consistent with hypoglycaemia. AE, adverse event; BG, blood glucose; BMI, body mass index; Dula, dulaglutide; n, number of subjects randomised and exposed to at least one dose of trial product as treated (safety analysis set); Sema, semaglutide.



# BMJ Open

## Impact of patient characteristics on efficacy and safety of once-weekly semaglutide versus dulaglutide: SUSTAIN 7 *post hoc* analyses

|                                 |                                                                                                                                                                                                                                                                                                                                                                                                                                        |
|---------------------------------|----------------------------------------------------------------------------------------------------------------------------------------------------------------------------------------------------------------------------------------------------------------------------------------------------------------------------------------------------------------------------------------------------------------------------------------|
| Journal:                        | <i>BMJ Open</i>                                                                                                                                                                                                                                                                                                                                                                                                                        |
| Manuscript ID                   | bmjopen-2020-037883.R1                                                                                                                                                                                                                                                                                                                                                                                                                 |
| Article Type:                   | Original research                                                                                                                                                                                                                                                                                                                                                                                                                      |
| Date Submitted by the Author:   | 04-Jul-2020                                                                                                                                                                                                                                                                                                                                                                                                                            |
| Complete List of Authors:       | Pratley, Richard; AdventHealth Orlando, Translational Research Institute Aroda, Vanita ; Brigham and Women's Hospital<br>Catargi, Andrei-Mircea; Novo Nordisk A/S<br>Lingvay, Ildiko; University of Texas Southwestern Medical Center<br>Lüdemann, Jörg; diabetes-falkensee, Diabetes Centre and Centre for Clinical Studies<br>Yildirim, Emre; Novo Nordisk A/S<br>Viljoen, Adie; Borthwick Diabetes Research Centre, Lister Hospital |
| <b>Primary Subject Heading</b>: | Diabetes and endocrinology                                                                                                                                                                                                                                                                                                                                                                                                             |
| Secondary Subject Heading:      | Evidence based practice                                                                                                                                                                                                                                                                                                                                                                                                                |
| Keywords:                       | General diabetes < DIABETES & ENDOCRINOLOGY, Diabetes & endocrinology < INTERNAL MEDICINE, Clinical trials < THERAPEUTICS                                                                                                                                                                                                                                                                                                              |
|                                 |                                                                                                                                                                                                                                                                                                                                                                                                                                        |

SCHOLARONE™  
Manuscripts



I, the Submitting Author has the right to grant and does grant on behalf of all authors of the Work (as defined in the below author licence), an exclusive licence and/or a non-exclusive licence for contributions from authors who are: i) UK Crown employees; ii) where BMJ has agreed a CC-BY licence shall apply, and/or iii) in accordance with the terms applicable for US Federal Government officers or employees acting as part of their official duties; on a worldwide, perpetual, irrevocable, royalty-free basis to BMJ Publishing Group Ltd ("BMJ") its licensees and where the relevant Journal is co-owned by BMJ to the co-owners of the Journal, to publish the Work in this journal and any other BMJ products and to exploit all rights, as set out in our [licence](#).

The Submitting Author accepts and understands that any supply made under these terms is made by BMJ to the Submitting Author unless you are acting as an employee on behalf of your employer or a postgraduate student of an affiliated institution which is paying any applicable article publishing charge ("APC") for Open Access articles. Where the Submitting Author wishes to make the Work available on an Open Access basis (and intends to pay the relevant APC), the terms of reuse of such Open Access shall be governed by a Creative Commons licence – details of these licences and which [Creative Commons](#) licence will apply to this Work are set out in our licence referred to above.

Other than as permitted in any relevant BMJ Author's Self Archiving Policies, I confirm this Work has not been accepted for publication elsewhere, is not being considered for publication elsewhere and does not duplicate material already published. I confirm all authors consent to publication of this Work and authorise the granting of this licence.

1  
2  
3  
4 1 **Title page**

5  
6 2 **Full title:** Impact of patient characteristics on efficacy and safety of once-weekly  
7  
8 3 semaglutide versus dulaglutide: SUSTAIN 7 *post hoc* analyses  
9

10  
11 4  
12  
13 5 **Authors:** Pratley Richard E<sup>1</sup>, Aroda Vanita R<sup>2</sup>, Catarig Andrei M<sup>3</sup>, Lingway Ildiko<sup>4</sup>,  
14  
15 6 Lüdemann Jörg<sup>5</sup>, Yildirim Emre<sup>3</sup>, Viljoen Adie<sup>6</sup>  
16

17  
18  
19  
20 8 **Author affiliations:**

21  
22 9 <sup>1</sup>AdventHealth Translational Research Institute for Metabolism and Diabetes, Orlando,  
23  
24 10 FL, USA; <sup>2</sup>Brigham and Women's Hospital, Boston, MA, USA; <sup>3</sup>Novo Nordisk A/S, Søborg,  
25  
26 11 Denmark; <sup>4</sup>University of Texas Southwestern Medical Center, Dallas, TX, USA; <sup>5</sup>diabetes-  
27  
28 12 falkensee, Diabetes Centre and Centre for Clinical Studies, Falkensee, Germany;  
29  
30 13 <sup>6</sup>Borthwick Diabetes Research Centre, Lister Hospital, Stevenage, UK  
31

32  
33 14  
34  
35 15 **Keywords:** type 2 diabetes, GLP-1, semaglutide, SUSTAIN, age, body mass index  
36  
37 16

38  
39  
40 17 **Contact details for corresponding author:**

41  
42 18 Dr Richard E. Pratley  
43  
44 19 AdventHealth Translational Research Institute for Metabolism and Diabetes  
45  
46 20 301 E. Princeton Street, Orlando, FL 32804, USA  
47  
48 21 Phone: +1-407-303-2519  
49  
50 22 E-mail: [Richard.Pratley.MD@AdventHealth.com](mailto:Richard.Pratley.MD@AdventHealth.com)  
51

52 23  
53  
54 24  
55  
56  
57  
58  
59  
60

**ABSTRACT**

**OBJECTIVE:** In SUSTAIN 7, once-weekly semaglutide demonstrated superior glycated haemoglobin (HbA<sub>1c</sub>) and body weight (BW) reductions versus once-weekly dulaglutide in subjects with type 2 diabetes (T2D). This *post hoc* analysis investigated the impact of clinically relevant subject characteristics on treatment effects of semaglutide versus dulaglutide.

**DESIGN:** Analyses by baseline age (<65, ≥65 years), sex (male, female), diabetes duration (≤5, >5-10, >10 years), HbA<sub>1c</sub> (≤7.5, >7.5-8.5, >8.5% [ $\leq$ 58, >58-69, >69 mmol/mol]) and body mass index (BMI) (<30, 30-<35, ≥35 kg/m<sup>2</sup>).

**SETTING:** 194 sites; 16 countries.

**PARTICIPANTS:** Subjects with T2D (n=1,199) exposed to treatment.

**INTERVENTIONS:** Semaglutide 0.5 mg versus dulaglutide 0.75 mg (low-dose comparison); semaglutide 1.0 mg versus dulaglutide 1.5 mg (high-dose comparison), all subcutaneously once weekly.

**PRIMARY AND SECONDARY OUTCOME MEASURES:** Change in HbA<sub>1c</sub> (primary endpoint) and BW (confirmatory secondary endpoint) from baseline to week 40; proportion of subjects achieving HbA<sub>1c</sub> targets (<7%, ≤6.5% [ $\leq$ 53,  $\leq$ 48 mmol/mol]) and weight-loss responses (≥5%, ≥10%) at week 40; and safety.

**RESULTS:** HbA<sub>1c</sub> and BW reductions (estimated treatment difference ranges: -0.22 to -0.70%-point; -1.76 to -3.84 kg) and proportion of subjects achieving HbA<sub>1c</sub> targets and weight-loss responses were statistically significantly greater for the majority of comparisons of semaglutide versus dulaglutide within each subgroup category and, excepting glycaemic control within the low-dose comparison in HbA<sub>1c</sub> subgroups, this was irrespective of subgroup or dose comparison. Gastrointestinal adverse events, the most common with both treatments, were reported by more females than males and, with semaglutide, decreased with increasing BMI.

1  
2  
3 51 CONCLUSIONS: Consistently greater improvements in HbA<sub>1c</sub> and BW with semaglutide  
4  
5 52 versus dulaglutide, regardless of age, sex, diabetes duration, glycaemic control and BMI,  
6  
7 53 support the efficacy of semaglutide across the continuum of care in a heterogeneous T2D  
8  
9 54 population.

10  
11 55 Clinical Trial Registration: NCT02648204 [ClinicalTrials.gov]  
12  
13  
14 56

### 16 57 **STRENGTHS AND LIMITATIONS OF THIS STUDY**

- 18  
19 58 • The analysis was designed to provide insight on the influence of five of the most  
20  
21 59 common and relevant patient-level factors from a clinical perspective  
22  
23 60 • The inclusion of comparator data allows for a more robust analysis and direct  
24  
25 61 comparison of the differences in efficacy and safety of semaglutide versus  
26  
27 62 dulaglutide across the subgroups and subgroup categories  
28  
29 63 • As the analysis is based on SUSTAIN 7 data alone, it may only be representative  
30  
31 64 of the trial-specific patient population  
32  
33 65 • The relatively small number of subjects in each subgroup category is a limitation  
34  
35 66 • As this is a *post hoc* analysis of a randomised clinical trial, there are inherent  
36  
37 67 limitations and, as such, the data should be interpreted with caution  
38  
39  
40  
41  
42  
43  
44  
45  
46  
47  
48  
49  
50  
51  
52  
53  
54  
55  
56  
57  
58  
59  
60

## 68 INTRODUCTION

69 The population of adults with type 2 diabetes (T2D) is heterogeneous, with varying  
70 clinical characteristics and comorbidities.(1) The importance of considering this  
71 heterogeneity when making treatment decisions is emphasised in guidelines on the  
72 management of T2D,(1,2) which recommend individualised patient-centred care  
73 considering the presence of comorbidities, including obesity, chronic kidney disease and  
74 cardiovascular disease.(2) Some studies have attempted to identify clusters of patients  
75 according to their clinical characteristics and risk of complications, in the hope this might  
76 enable treatment to be more precisely targeted to those who are likely to benefit  
77 most.(3) However, there is an ongoing debate about whether clustering or stratifying  
78 patients based on simple clinical characteristics is the most useful approach.(4,5)

79 Glucagon-like peptide-1 receptor agonists (GLP-1RAs) are an established treatment for  
80 T2D, recommended in current management guidelines.(1,2) The efficacy and safety of  
81 two once-weekly (OW) subcutaneous medications from the GLP-1RA class, semaglutide  
82 and dulaglutide, were respectively investigated in the global phase 3a SUSTAIN  
83 (Semaglutide Unabated Sustainability in Treatment of Type 2 Diabetes) (6-10) and  
84 AWARD (Assessment of Weekly Administration of LY2189265 in Diabetes) (11-20)  
85 clinical trial programmes. Both drugs have also been investigated in large-scale  
86 cardiovascular outcomes trials.(21,22) *Post hoc* analyses of the SUSTAIN and the  
87 AWARD trials have analysed patient subgroups across the continuum of T2D care.(23-  
88 35) Such analyses showed consistent, clinically relevant reductions in glycated  
89 haemoglobin (HbA<sub>1c</sub>) and body weight (BW) with semaglutide across patient subgroups  
90 based on characteristics including age, baseline body mass index (BMI), baseline HbA<sub>1c</sub>,  
91 diabetes duration, race and ethnicity.(23-26,28) Dulaglutide has also been shown to be  
92 efficacious across subgroups based on sex, age, duration of diabetes, beta-cell function,  
93 HbA<sub>1c</sub>, BW and BMI.(29-35)

94 In the phase 3b SUSTAIN 7 clinical trial, semaglutide and dulaglutide were compared  
95 head-to-head in subjects with T2D on background treatment with metformin.(36) The

1  
2  
3 96 trial showed superior reductions in HbA<sub>1c</sub> and BW with semaglutide versus dulaglutide,  
4  
5 97 for both low-dose (semaglutide 0.5 mg versus dulaglutide 0.75 mg) and high-dose  
6  
7 98 (semaglutide 1.0 mg versus dulaglutide 1.5 mg) comparisons.(36) Although both  
8  
9 99 semaglutide and dulaglutide have individually demonstrated efficacy across multiple  
10  
11 100 patient subpopulations,(23-27,29-35) it is as yet unknown whether the treatment  
12  
13 101 differences observed in the SUSTAIN 7 trial are influenced by heterogeneity in the  
14  
15 102 characteristics of the patients with T2D.

16  
17  
18 103 To evaluate whether clinically relevant patient characteristics (age, sex, diabetes  
19  
20 104 duration, HbA<sub>1c</sub> and BMI at baseline) affected the efficacy and safety of semaglutide  
21  
22 105 versus dulaglutide, *post hoc* analyses of data from the SUSTAIN 7 trial were performed.  
23  
24 106

## 25 26 27 107 **MATERIALS AND METHODS**

### 28 29 108 **Trial design**

30  
31  
32 109 The design of the SUSTAIN 7 trial has been previously reported.(36) Briefly, this was an  
33  
34 110 open-label trial in which subjects with uncontrolled T2D were randomised to receive  
35  
36 111 semaglutide OW 0.5 mg or 1.0 mg, or dulaglutide OW 0.75 mg or 1.5 mg, as add-on to  
37  
38 112 background treatment with metformin, and were followed throughout a 40-week  
39  
40 113 treatment period. Semaglutide was administered subcutaneously via a prefilled injection  
41  
42 114 device at one of two maintenance dose levels (0.5 mg or 1.0 mg OW), following a fixed-  
43  
44 115 dose escalation regimen.(36) Dulaglutide was administered subcutaneously in  
45  
46 116 accordance with the regimen used in the phase 3 clinical trial programme (0.75 mg or  
47  
48 117 1.5 mg OW), without dose escalation.(37)

49  
50 118 The trial was registered with ClinicalTrials.gov (NCT02648204) and conducted in  
51  
52 119 accordance with the International Conference on Harmonisation Good Clinical Practice  
53  
54 120 guidelines and the Declaration of Helsinki. The trial protocol (see Supplement) was  
55  
56 121 approved by the central ethics committees (Eticka komisia, Nemocnica Svateho Michala,  
57  
58 122 a.s., Bratislava, Slovakia and, for Portugal, Comissão de Ética para a Investigação  
59  
60

1  
2  
3 123 Clínica) and by the institutional review boards and ethics committees at each  
4  
5 124 participating centre (**Supplementary Table 1**) and subjects provided written informed  
6  
7 125 consent before trial-related activities commenced.  
8  
9

### 10 126 **Patient and public involvement**

11  
12 127 The research question and endpoints, such as efficacy and safety, were informed  
13  
14 128 indirectly by patients' priorities, experiences and preferences, via input from clinicians  
15  
16 129 during advisory board meetings. No patients were involved directly in the design,  
17  
18 130 recruitment and conduct of the trial. Furthermore, the trial results were not directly  
19  
20 131 disseminated to trial patients, but were publicly communicated and available via press  
21  
22 132 release, trial portal and journal publication. In the trial, the burden of intervention was  
23  
24 133 not assessed by the patients, nor were there any patient advisers involved.  
25  
26

### 27 134 **Patient population**

28  
29 135 The inclusion and exclusion criteria for the SUSTAIN 7 trial are described in detail  
30  
31 136 elsewhere.(36) Key inclusion criteria were: diagnosis of T2D; age  $\geq 18$  years; HbA<sub>1c</sub>  
32  
33 137  $\geq 7.0$ -10.5% (53-91 mmol/mol). Key exclusion criteria were: estimated glomerular  
34  
35 138 filtration rate  $< 60$  mL/min/1.73 m<sup>2</sup>; history of chronic or idiopathic acute pancreatitis;  
36  
37 139 known proliferative retinopathy or maculopathy requiring acute treatment (determined  
38  
39 140 by fundoscopy/fundus photography performed within 90 days before randomisation  
40  
41 141 according to local practice); screening calcitonin value  $\geq 50$  ng/L; personal/family history  
42  
43 142 of medullary thyroid carcinoma or multiple endocrine neoplasia syndrome type 2; acute  
44  
45 143 coronary or cerebrovascular event within 90 days before randomisation; heart failure  
46  
47 144 (New York Heart Association Class IV); and any of the following: myocardial infarction,  
48  
49 145 stroke, or hospitalisation for unstable angina and/or transient ischaemic attack within  
50  
51 146 the past 180 days prior to screening.(36)  
52  
53

### 54 147 **Endpoints**

55  
56  
57 148 The primary endpoint was change in HbA<sub>1c</sub> (%-point) from baseline to end of treatment  
58  
59 149 at week 40 and the secondary confirmatory endpoint was change in BW (kg) over the  
60



1  
2  
3 150 same period. Predefined HbA<sub>1c</sub> treatment targets (proportion of subjects achieving HbA<sub>1c</sub>  
4  
5 151 targets of <7% [53 mmol/mol] and ≤6.5% [48 mmol/mol]) and weight-loss responses  
6  
7 152 (proportion of subjects achieving ≥5% and ≥10% weight loss) were also assessed.  
8  
9

10 153 The numbers of adverse events (AEs), serious AEs and AEs leading to premature  
11  
12 154 treatment discontinuation were reported. Specific AEs of clinical interest, such as  
13  
14 155 gastrointestinal (GI) disorders and hypoglycaemic events, were also evaluated.  
15

### 16 156 **Subgroup analyses**

17  
18  
19 157 For this *post hoc* analysis, subjects were stratified into subgroups selected for potential  
20  
21 158 clinical relevance: age at baseline (<65 years, ≥65 years), sex (male, female), diabetes  
22  
23 159 duration at baseline (≤5 years, >5–10 years, >10 years), baseline HbA<sub>1c</sub> (≤7.5%, >7.5–  
24  
25 160 8.5%, >8.5% [≤58, >58–69, >69 mmol/mol]) and baseline BMI (<30 kg/m<sup>2</sup>,  
26  
27 161 30–<35 kg/m<sup>2</sup>, ≥35 kg/m<sup>2</sup>). The baseline BMI <25 kg/m<sup>2</sup> subgroup category was also  
28  
29 162 evaluated; however, due to the small number of subjects (representing less than 10% of  
30  
31 163 the total trial population), these data are not included in the Results, but are provided in  
32  
33 164 the Supplement.  
34  
35

### 36 165 **Statistical analyses**

37  
38  
39 166 The efficacy analyses were based on the full analysis set, comprising all subjects  
40  
41 167 randomised and exposed to at least one dose of the trial product, using 'on-treatment  
42  
43 168 without rescue medication' data (as randomised). Analysis of covariance (ANCOVA) was  
44  
45 169 performed for each endpoint, including the interaction between treatment and subgroup  
46  
47 170 as a factor. Multiple imputation was used to account for missing data. Specifically, using  
48  
49 171 a sequential multiple-imputation approach, missing values for the underlying continuous  
50  
51 172 assessments were imputed by treatment group, assuming missing data were missing at  
52  
53 173 random, and based on a linear-regression model. A sequential conditional-regression  
54  
55 174 approach was applied whereby missing observations at any post-baseline visits were  
56  
57 175 imputed based on a linear-regression model and incorporating observations from  
58  
59  
60

1  
2  
3 176 previous visits including baseline. Binary endpoints were created and logistic-regression  
4  
5 177 models run on the complete data set; inference was drawn using Rubin's rule.(38)  
6  
7  
8 178 Values for the mean change from baseline for HbA<sub>1c</sub> and BW were calculated, and the  
9  
10 179 data are presented as mean and standard error. Estimated treatment differences (ETDs)  
11  
12 180 for the change from baseline in HbA<sub>1c</sub> and BW, and odds ratios (ORs) for the proportions  
13  
14 181 of subjects achieving HbA<sub>1c</sub> targets or weight-loss responses, both with 95% confidence  
15  
16 182 intervals, were also calculated for the low-dose (semaglutide 0.5 mg versus dulaglutide  
17  
18 183 0.75 mg) and high-dose (semaglutide 1.0 mg versus dulaglutide 1.5 mg) comparisons.  
19  
20 184 To evaluate the evidence of heterogeneity of treatment effects across the clinical  
21  
22 185 characteristics, a p-value for interaction between treatment effect and subgroup  
23  
24 186 categories was calculated for both dose comparisons in all subgroup analyses, without  
25  
26 187 adjustment for multiplicity.

27  
28 188 Safety analyses were based on the safety analysis set, which included all randomised  
29  
30 189 subjects who were exposed to at least one dose of trial product, based on 'as-treated'  
31  
32 190 data and summarised descriptively. Safety was assessed within each treatment arm  
33  
34 191 (semaglutide 0.5 mg, dulaglutide 0.75 mg, semaglutide 1.0 mg, dulaglutide 1.5 mg) in  
35  
36 192 each of the subgroup categories.

37  
38  
39 193 Analyses were conducted using SAS version 9.4. Baseline characteristics and AEs are  
40  
41 194 provided as descriptive data only.

42  
43  
44 195

## 45 46 196 **RESULTS**

### 47 48 49 197 **Subject disposition and baseline characteristics**

50  
51 198 Baseline characteristics are summarised by treatment arm within each subgroup  
52  
53 199 category (**Table 1; Supplementary Tables 2–6**). Subject characteristics were  
54  
55 200 generally comparable across subgroup categories with some exceptions. In all treatment  
56  
57 201 arms, diabetes duration was longer, and BW and BMI were lower in the elderly (≥65  
58  
59 202 years) subgroup compared with the non-elderly (<65 years) subgroup (**Table 1**). Males

1  
2  
3 203 were generally heavier but with a lower BMI, and had a longer diabetes duration than  
4  
5 204 females (**Supplementary Table 2**). In the diabetes duration subgroup categories ( $\leq 5$   
6  
7 205 years,  $>5-10$  years,  $>10$  years), age increased with increasing diabetes duration and, in  
8  
9 206 the semaglutide 1.0 mg treatment arm, BW and BMI decreased with increasing diabetes  
10  
11 207 duration (**Supplementary Table 3**). Across the baseline HbA<sub>1c</sub> subgroups ( $\leq 7.5\%$ ,  
12  
13 208  $>7.5-8.5$ ,  $>8.5\%$  [ $\leq 58$ ,  $>58-69$ ,  $>69$  mmol/mol]), subjects in the semaglutide 0.5 mg  
14  
15 209 treatment arm exhibited decreasing BW and BMI with increasing HbA<sub>1c</sub> (**Supplementary**  
16  
17 210 **Table 4**). In keeping with the distribution of subjects in the sex subgroup categories,  
18  
19 211 there was a greater proportion of females versus males in the two highest BMI  
20  
21 212 subgroups, and the proportion of Asian subjects was higher in the subgroup with the  
22  
23 213 lowest BMI versus the subgroup with the highest BMI (**Supplementary Table 5**). When  
24  
25 214 compared with the other BMI subgroup categories, subjects with BMI  $<25$  kg/m<sup>2</sup> had the  
26  
27 215 highest HbA<sub>1c</sub> levels, the highest proportions of male and Asian subjects and, as  
28  
29 216 expected, the lowest BW (**Supplementary Table 6**).

217 **Table 1. Subject demographics and baseline characteristics by age**

|                              |              | <65 years   |              |             |             | ≥65 years   |              |             |             |
|------------------------------|--------------|-------------|--------------|-------------|-------------|-------------|--------------|-------------|-------------|
|                              | All subjects | Sema 0.5 mg | Dula 0.75 mg | Sema 1.0 mg | Dula 1.5 mg | Sema 0.5 mg | Dula 0.75 mg | Sema 1.0 mg | Dula 1.5 mg |
| <b>n</b>                     | <b>1,199</b> | <b>222</b>  | <b>238</b>   | <b>247</b>  | <b>232</b>  | <b>79</b>   | <b>61</b>    | <b>53</b>   | <b>67</b>   |
| Age, years                   | 56 (10.6)    | 51.6 (8.4)  | 51.7 (8.3)   | 52.4 (9.0)  | 52.0 (8.5)  | 69.4 (4.4)  | 69.1 (3.9)   | 69.3 (4.2)  | 69.4 (3.9)  |
| Sex, n (%)                   |              |             |              |             |             |             |              |             |             |
| Male                         | 662 (55.2)   | 119 (53.6)  | 131 (55.0)   | 132 (53.4)  | 130 (56.0)  | 50 (63.3)   | 29 (47.5)    | 30 (56.6)   | 41 (61.2)   |
| Female                       | 537 (44.8)   | 103 (46.4)  | 107 (45.0)   | 115 (46.6)  | 102 (44.0)  | 29 (36.7)   | 32 (52.5)    | 23 (43.4)   | 26 (38.8)   |
| Diabetes duration, years     | 7.4 (5.7)    | 6.8 (5.4)   | 6.3 (5.2)    | 6.6 (5.3)   | 6.9 (5.2)   | 10.2 (6.7)  | 9.8 (5.9)    | 10.2 (6.6)  | 10.3 (6.3)  |
| HbA <sub>1c</sub> , %        | 8.2 (0.9)    | 8.4 (1.0)   | 8.2 (0.9)    | 8.3 (0.9)   | 8.3 (0.9)   | 8.1 (0.9)   | 8.0 (0.8)    | 7.9 (0.8)   | 8.0 (0.8)   |
| HbA <sub>1c</sub> , mmol/mol | 66.4 (10.0)  | 68.2 (10.7) | 66.2 (10.1)  | 66.9 (10.1) | 66.7 (9.9)  | 65.4 (9.7)  | 63.6 (9.0)   | 62.8 (9.2)  | 64.1 (8.7)  |
| Body weight, kg              | 95.2(22.6)   | 97.8 (25.6) | 96.5 (23.6)  | 97.2 (20.7) | 94.3 (23.2) | 92.4 (20.1) | 92.1 (20.4)  | 87.4 (20.2) | 90.2 (15.8) |
| BMI, kg/m <sup>2</sup>       | 33.5 (6.8)   | 34.4 (7.7)  | 34.0 (7.1)   | 34.2 (6.6)  | 33.4 (6.9)  | 31.7 (4.5)  | 32.4 (5.9)   | 30.9 (5.1)  | 32.1 (5.4)  |
| Race, n (%)                  |              |             |              |             |             |             |              |             |             |
| Asian                        | 191 (15.9)   | 44 (19.8)   | 45 (18.9)    | 34 (13.8)   | 52 (22.4)   | 6 (7.6)     | 3 (4.9)      | 4 (7.5)     | 3 (4.5)     |
| Black/African American       | 70 (5.8)     | 13 (5.9)    | 13 (5.5)     | 14 (5.7)    | 16 (6.9)    | 4 (5.1)     | 4 (6.6)      | 4 (7.5)     | 2 (3.0)     |
| White                        | 928 (77.4)   | 164 (73.9)  | 178 (74.8)   | 198 (80.2)  | 158 (68.1)  | 69 (87.3)   | 54 (88.5)    | 45 (84.9)   | 62 (92.5)   |
| Other                        | 10 (0.8)     | 1 (0.5)     | 2 (0.8)      | 1 (0.4)     | 6 (2.6)     | 0           | 0            | 0           | 0           |
| Ethnic group, n (%)          |              |             |              |             |             |             |              |             |             |
| Hispanic/Latino              | 138 (11.5)   | 23 (10.4)   | 30 (12.6)    | 30 (12.1)   | 38 (16.4)   | 6 (7.6)     | 1 (1.6)      | 5 (9.4)     | 5 (7.5)     |
| Non-Hispanic/Latino          | 1,061 (88.5) | 199 (89.6)  | 208 (87.4)   | 217 (87.9)  | 194 (83.6)  | 73 (92.4)   | 60 (98.4)    | 48 (90.6)   | 62 (92.5)   |

218 'On-treatment without rescue medication' data. Subgroup data are presented as mean (standard deviation) unless otherwise indicated. BMI: body mass index; Dula:  
 219 dulaglutide; HbA<sub>1c</sub>: glycated haemoglobin; n: number of subjects randomised and exposed to at least one dose of trial product as randomised (full analysis set); Sema:  
 220 semaglutide.

## 221 **Glycaemic control and body weight changes**

222 Missing observations in the efficacy analyses were mainly due to subjects who  
223 discontinued treatment or received rescue medication. At week 40, between 81% and  
224 86% of subjects were on treatment without initiation of rescue medication in the four  
225 treatment arms (**Supplementary Figure 1**).

226 Overall, the mean changes from baseline in HbA<sub>1c</sub> and BW (**Supplementary Figure 2**)  
227 and the proportions of subjects achieving HbA<sub>1c</sub> targets of <7% (53 mmol/mol) and ≤  
228 6.5% (48 mmol/mol) and weight-loss responses of ≥5% and ≥10% (**Figures 1 and 2**)  
229 were of greater magnitude with semaglutide versus dulaglutide treatment. This  
230 observation was confirmed by the ETDs for change from baseline (**Figure 3**) and the  
231 ORs for proportions of subjects (**Supplementary Figures 3 and 4**) which significantly  
232 favoured semaglutide in the majority of both the low-dose and high-dose comparisons  
233 within each subgroup category.

234 For the individual analyses by subgroup, the findings were as follows:

235 Age at baseline (<65 years, ≥65 years): the proportion of elderly versus non-elderly  
236 subjects achieving glycaemic targets and weight-loss response of ≥5% was consistently  
237 numerically higher with both semaglutide and dulaglutide (**Figure 1A and B, and 2A**),  
238 despite elderly subjects having a lower baseline HbA<sub>1c</sub> and BMI than non-elderly subjects  
239 (**Table 1**). Proportions of subjects achieving ≥10% weight loss were comparable between  
240 the two age subgroups for both treatment arms (**Figure 2B**). Absolute changes in HbA<sub>1c</sub>  
241 and BW from baseline at week 40 by age are shown in **Supplementary Figure 2A and**  
242 **B**.

243 Sex (male, female): reductions in HbA<sub>1c</sub> and BW were generally numerically greater in  
244 female than in male subjects (**Supplementary Figure 2C and D**), as was baseline BMI  
245 (**Supplementary Table 2**). This was reflected in the correspondingly greater  
246 proportions of female versus male subjects achieving the glycaemic targets and weight-  
247 loss responses (**Figure 1C and D, and 2C and D**).

1  
2  
3 248 Diabetes duration at baseline ( $\leq 5$  years,  $>5-10$  years,  $>10$  years): comparatively  
4  
5 249 smaller numeric reductions in HbA<sub>1c</sub> and BW were observed with semaglutide 1.0 mg in  
6  
7 250 subjects with diabetes duration of  $>10$  years versus  $\leq 10$  years, with no apparent  
8  
9 251 differences observed in the other treatment arms (**Supplementary Figure 2E and F**).  
10  
11 252 A similar pattern was observed for the proportions of subjects achieving glycaemic  
12  
13 253 targets and weight-loss responses in the semaglutide 1.0 mg treatment group (**Figure**  
14  
15 254 **1E and F, and 2E and F**).

16  
17  
18 255 Baseline HbA<sub>1c</sub> ( $\leq 7.5\%$ ,  $>7.5-8.5\%$ ,  $>8.5\%$  [ $\leq 58$ ,  $>58-69$ ,  $>69$  mmol/mol]): with  
19  
20 256 semaglutide 0.5 mg, and to a greater degree with semaglutide 1.0 mg, the magnitude of  
21  
22 257 the mean reduction in HbA<sub>1c</sub> from baseline increased numerically with increasing baseline  
23  
24 258 HbA<sub>1c</sub>; the converse was apparent for BW, whereby the amount of weight lost was less  
25  
26 259 with increasing baseline HbA<sub>1c</sub> (**Supplementary Figure 2G and H**). A similar though  
27  
28 260 less apparent pattern was observed with dulaglutide (**Supplementary Figure 2G and**  
29  
30 261 **H**), and this was reflected in the proportions of subjects achieving glycaemic targets  
31  
32 262 (**Figure 1G and H**). Across baseline HbA<sub>1c</sub> subgroups, the greatest proportion of  
33  
34 263 subjects achieving  $\geq 5\%$  weight loss was observed in those subjects receiving  
35  
36 264 semaglutide 1.0 mg, particularly in the HbA<sub>1c</sub> subgroup categories of  $\leq 7.5\%$  (58  
37  
38 265 mmol/mol) and  $>7.5-8.5\%$  (58-69 mmol/mol) (**Figure 2G**). There were no other  
39  
40 266 apparent differences across the subgroup categories regarding the proportions of  
41  
42 267 subjects achieving weight-loss responses (**Figure 2G and H**).

43  
44  
45 268 Baseline BMI ( $<30$  kg/m<sup>2</sup>,  $30- <35$  kg/m<sup>2</sup>,  $\geq 35$  kg/m<sup>2</sup>): There were no apparent trends in  
46  
47 269 glycaemic outcomes across the BMI categories for either dose comparison (**Figure 1I**  
48  
49 270 **and J; Supplementary Figure 2I**). Mean reductions in BW for both semaglutide and  
50  
51 271 dulaglutide increased numerically with increasing baseline BMI, with the greatest  
52  
53 272 reductions in the  $\geq 35$  kg/m<sup>2</sup> BMI subgroup category for all treatment arms  
54  
55 273 (**Supplementary Figure 2J**). There were no apparent trends in other BW outcomes  
56  
57 274 across the BMI categories for either dose comparison (**Figure 2I and J;**  
58  
59 275 **Supplementary Figure 2J**), or when BW reduction was expressed as percentage

1  
2  
3 276 change (**Supplementary Figure 5**). Changes in the <25 kg/m<sup>2</sup> BMI subgroup were  
4  
5 277 largely consistent with those observed in the broader population (**Supplementary**  
6  
7 278 **Figures 6 and 7**).

### 279 **Treatment–subgroup interaction effects**

11  
12 280 For each of the subgroups, analysis of the ETDs for the change from baseline in HbA<sub>1c</sub> in  
13  
14 281 the age, sex, diabetes duration, baseline HbA<sub>1c</sub> and baseline BMI subgroups, the  
15  
16 282 p-values for the low-dose and high-dose comparisons were nonsignificant, except in the  
17  
18 283 analysis of the HbA<sub>1c</sub> subgroups within the low-dose comparison (p<0.05 for the  
19  
20 284 treatment–subgroup interaction effect) (**Figure 3A and B**). The change from baseline in  
21  
22 285 BW in the age, sex, diabetes duration, baseline HbA<sub>1c</sub> and baseline BMI subgroups was  
23  
24 286 similar, with nonsignificant treatment–subgroup interactions for both dose comparisons  
25  
26 287 (**Figure 3C**). Similarly, treatment–subgroup interactions were nonsignificant for the  
27  
28 288 analysis of the ORs for the proportions of subjects achieving glycaemic targets and  
29  
30 289 weight-loss responses (**Supplementary Figures 3 and 4**).

### 32 33 290 **Safety outcomes**

34  
35 291 Overall, AEs were reported in more than half of subjects irrespective of the subgroup  
36  
37 292 category (ranging from 55.3% [dulaglutide 0.75 mg; diabetes duration >5–10 years] to  
38  
39 293 80.6% [dulaglutide 1.5 mg; elderly]) and were generally more common with  
40  
41 294 semaglutide 0.5 mg than with dulaglutide 0.75 mg, and less common with semaglutide  
42  
43 295 1.0 mg than with dulaglutide 1.5 mg. Premature treatment discontinuations due to AEs  
44  
45 296 were higher with semaglutide than with dulaglutide, and were primarily due to GI AEs  
46  
47 297 (**Table 2; Supplementary Tables 7–10**).

298 **Table 2. Adverse events by age**

| n (%)                                                               | <65 years     |               |               |               |               | ≥65 years    |              |              |              |
|---------------------------------------------------------------------|---------------|---------------|---------------|---------------|---------------|--------------|--------------|--------------|--------------|
|                                                                     | All subjects  | Sema 0.5 mg   | Dula 0.75 mg  | Sema 1.0 mg   | Dula 1.5 mg   | Sema 0.5 mg  | Dula 0.75 mg | Sema 1.0 mg  | Dula 1.5 mg  |
|                                                                     | <b>1,199</b>  | <b>222</b>    | <b>238</b>    | <b>247</b>    | <b>232</b>    | <b>79</b>    | <b>61</b>    | <b>53</b>    | <b>67</b>    |
| AEs                                                                 | 818<br>(68.2) | 152<br>(68.5) | 150<br>(63.0) | 166<br>(67.2) | 167<br>(72.0) | 52<br>(65.8) | 36<br>(59.0) | 41<br>(77.4) | 54<br>(80.6) |
| Serious AEs                                                         | 86<br>(7.2)   | 10<br>(4.5)   | 18<br>(7.6)   | 20<br>(8.1)   | 16<br>(6.9)   | 7<br>(8.9)   | 6<br>(9.8)   | 3<br>(5.7)   | 6<br>(9.0)   |
| AEs leading to premature treatment discontinuation                  | 87<br>(7.3)   | 17<br>(7.7)   | 12<br>(5.0)   | 19<br>(7.7)   | 16<br>(6.9)   | 7<br>(8.9)   | 2<br>(3.3)   | 10<br>(18.9) | 4<br>(6.0)   |
| Gastrointestinal AEs leading to premature treatment discontinuation | 54<br>(4.5)   | 12<br>(5.4)   | 5<br>(2.1)    | 13<br>(5.2)   | 13<br>(5.6)   | 4<br>(5.1)   | 1<br>(1.6)   | 5<br>(9.4)   | 1<br>(1.5)   |
| Gastrointestinal AEs                                                | 505<br>(42.1) | 99<br>(44.6)  | 80<br>(33.6)  | 105<br>(42.5) | 108<br>(46.6) | 30<br>(38.0) | 20<br>(32.8) | 28<br>(52.8) | 35<br>(52.2) |
| Vomiting                                                            | 103<br>(8.6)  | 23<br>(10.4)  | 7<br>(2.9)    | 27<br>(10.9)  | 21<br>(9.1)   | 8<br>(10.1)  | 5<br>(8.2)   | 4<br>(7.5)   | 8<br>(11.9)  |
| Nausea                                                              | 230<br>(19.2) | 49<br>(22.1)  | 33<br>(13.9)  | 52<br>(21.1)  | 43<br>(18.5)  | 19<br>(24.1) | 6<br>(9.8)   | 11<br>(20.8) | 17<br>(25.4) |
| Diarrhoea                                                           | 160<br>(13.3) | 32<br>(14.4)  | 21<br>(8.8)   | 32<br>(13.0)  | 42<br>(18.1)  | 11<br>(13.9) | 2<br>(3.3)   | 9<br>(17.0)  | 11<br>(16.4) |
| Hypoglycaemia (severe/BG-confirmed)                                 | 15<br>(1.3)   | 2<br>(0.9)    | 1<br>(0.4)    | 4<br>(1.6)    | 5<br>(2.2)    | 0            | 2<br>(3.3)   | 1<br>(1.9)   | 0            |

299 Data are presented as number and proportion (%) of subjects with adverse events. Hypoglycaemia was defined as an episode that was severe (according to the American  
300 Diabetes Association classification) or BG-confirmed (plasma glucose value <56 mg/dL [3.1 mmol/L]) with symptoms consistent with hypoglycaemia. AE: adverse event;  
301 BG: blood glucose; Dula: dulaglutide; n: number of subjects randomised and exposed to at least one dose of trial product as treated (safety analysis set); Sema:  
302 semaglutide.



1  
2  
3  
4 303 GI AEs were the most frequently reported events, with generally higher rates with  
5  
6 304 semaglutide 0.5 mg versus dulaglutide 0.75 mg, and dulaglutide 1.5 mg versus  
7  
8 305 semaglutide 1.0 mg, across the subgroups and subgroup categories (ranging from  
9  
10 306 27.7% [dulaglutide 0.75 mg; diabetes duration >5–10 years] to 59.5% [dulaglutide 1.5  
11  
12 307 mg; HbA<sub>1c</sub> ≤7.5% [58 mmol/mol]), with nausea being the most common (ranging from  
13  
14 308 8.1% [dulaglutide 0.75 mg; male] to 29.5% [semaglutide 0.5 mg; female]) (**Table 2;**  
15  
16 309 **Supplementary Tables 7–10**). Across the subgroup categories, more female than  
17  
18 310 male subjects reported GI AEs overall, with GI AEs generally decreasing with increasing  
19  
20 311 BMI in subjects treated with semaglutide (**Supplementary Tables 7 and 10**). The  
21  
22 312 highest proportion of GI AEs were reported by subjects with BMI <25 kg/m<sup>2</sup>  
23  
24 313 (**Supplementary Table 11**).

25  
26 314

## 29 315 **DISCUSSION**

31  
32 316 Given the heterogeneous profile of patients with T2D and the guidance for such  
33  
34 317 differences to be considered when making treatment choices,(2,3) this *post hoc* analysis  
35  
36 318 of SUSTAIN 7 data assessed the impact of individual clinical characteristics on the effect  
37  
38 319 of semaglutide versus dulaglutide treatment. The analyses indicate that the effect of  
39  
40 320 semaglutide versus dulaglutide was not influenced by age, sex, diabetes duration, HbA<sub>1c</sub>  
41  
42 321 or BMI at baseline, with the exception of the low-dose comparison for HbA<sub>1c</sub> in the  
43  
44 322 baseline HbA<sub>1c</sub> subgroup, which showed increasing efficacy for semaglutide 0.5 mg  
45  
46 323 versus dulaglutide 0.75 mg in subjects with increasing HbA<sub>1c</sub> at baseline.

47  
48 324 This *post hoc* analysis supports the finding from the overall SUSTAIN 7 trial that  
49  
50 325 semaglutide was superior to dulaglutide in reducing HbA<sub>1c</sub> and BW;(36) the same was  
51  
52 326 observed across each of the subgroups and within the various subgroup categories  
53  
54 327 presented here.

55  
56  
57 328 This *post hoc* analysis also supports findings from similar subgroup analyses of SUSTAIN  
58  
59 329 trials. An analysis of SUSTAIN 1–5 data showed greater reductions in HbA<sub>1c</sub> and BW with  
60

1  
2  
3 330 semaglutide versus comparators, and comparable efficacy in elderly subjects (a  
4  
5 331 population often presenting with comorbidities) and non-elderly subjects, without an  
6  
7 332 increased risk of hypoglycaemia.(25) Similarly, analyses of pooled SUSTAIN data showed  
8  
9 333 clinically relevant reductions in HbA<sub>1c</sub> and BW with semaglutide, regardless of baseline  
10  
11 334 BW, HbA<sub>1c</sub>, diabetes duration, race and ethnicity.(23-26,28)  
12  
13  
14 335 HbA<sub>1c</sub> reductions were greater with increasing baseline HbA<sub>1c</sub> for both semaglutide and  
15  
16 336 dulaglutide in the present analyses, which has been observed with dulaglutide  
17  
18 337 previously,(29,31-33) as well as with liraglutide,(39) lixisenatide (40) and other  
19  
20 338 antihyperglycaemic agents. Furthermore, a converse relationship between weight loss  
21  
22 339 and baseline HbA<sub>1c</sub> levels was observed, whereby increasing baseline HbA<sub>1c</sub> was  
23  
24 340 associated with greater reductions in HbA<sub>1c</sub> but a decreasing magnitude of weight loss. A  
25  
26 341 similar pattern has been observed with liraglutide as an add-on to insulin treatment,(41)  
27  
28 342 with exenatide alone (42) and with dulaglutide.(31,32) These findings have relevance for  
29  
30 343 clinical practice, indicating that there may be an effect with GLP-1RAs (and potentially  
31  
32 344 other antihyperglycaemic therapies) in predicting treatment responses based on HbA<sub>1c</sub>  
33  
34 345 levels.(41) Conversely, a recent analysis of the AWARD trials found a weak positive  
35  
36 346 correlation between HbA<sub>1c</sub> reduction and weight loss with dulaglutide.(43) Several  
37  
38 347 mechanisms, also associated with other antihyperglycaemic agents, may contribute to  
39  
40 348 these results.(44) Improved treatment-related glycaemic control is associated with  
41  
42 349 decreased glycosuria,(41,44) normalised protein turnover and a decreased catabolic  
43  
44 350 effect,(44) in addition to decreased energy expenditure and resting metabolic rate.(44)  
45  
46 351 As GLP-1RAs exhibit a glucose-dependent mechanism of action, the greater post-  
47  
48 352 treatment reductions in HbA<sub>1c</sub> from a higher initial baseline HbA<sub>1c</sub> may contribute to the  
49  
50 353 retention of glucose calories and, thereby, moderation of the achievable weight loss. In  
51  
52 354 these analyses, greater weight loss was observed with increasing baseline BMI for both  
53  
54 355 semaglutide and dulaglutide, aligning with what has been previously reported for  
55  
56 356 semaglutide (23) and dulaglutide.(35) While percentage weight loss was also greater  
57  
58 357 with semaglutide versus dulaglutide, the percentage change in weight loss was generally  
59  
60

1  
2  
3 358 of a similar magnitude across BMI categories, indicating that the weight-loss pattern  
4  
5 359 observed across the HbA<sub>1c</sub> subgroup categories may be associated with subjects'  
6  
7 360 baseline BMI. High BMI is associated with an insulin-resistant phenotype in some  
8  
9 361 patients,(3) and less weight loss is observed in patients with diabetes who are insulin  
10  
11 362 resistant than in those with insulin sensitivity.(45) However, clinically relevant reductions  
12  
13 363 in BW were achieved for all BMI subgroup categories, and the magnitude of weight loss  
14  
15 364 was comparatively greater for semaglutide than for dulaglutide. This is an important  
16  
17 365 consideration for clinical practice, given the increasing interest in weight management as  
18  
19 366 a key aspect of treatment for T2D.(1)

21  
22 367 Analysis of the ETDs for change from baseline in HbA<sub>1c</sub> and BW and ORs for the  
23  
24 368 proportions of subjects achieving HbA<sub>1c</sub> targets or weight-loss responses indicated a  
25  
26 369 consistent effect of semaglutide versus dulaglutide across subgroup categories. These  
27  
28 370 findings are aligned with previous analyses of subpopulations treated with GLP-1RAs,  
29  
30 371 including semaglutide and dulaglutide, which also reported a nonsignificant impact of  
31  
32 372 age, sex or diabetes duration on treatment effect,(23-27,29-35) although weight loss  
33  
34 373 tended to be greater in women than in men with dulaglutide,(31) as was also observed  
35  
36 374 in this analysis.

37  
38  
39 375 Consistent with the known class effect of GLP-1RAs,(46) both semaglutide and  
40  
41 376 dulaglutide reported relatively high levels of GI AEs. The rate of GI AEs was higher with  
42  
43 377 semaglutide versus dulaglutide in the low-dose comparison; in the high-dose comparison  
44  
45 378 it was higher with dulaglutide versus semaglutide.(36) Premature treatment  
46  
47 379 discontinuations due to AEs were higher with semaglutide than with dulaglutide, which  
48  
49 380 may be due to the higher levels of moderate GI AEs observed in the overall SUSTAIN 7  
50  
51 381 trial.(36) The occurrence of some GI AEs may be dose-dependent, and nausea (and  
52  
53 382 also vomiting for semaglutide) is usually transient with both semaglutide (47) and  
54  
55 383 dulaglutide;(14) furthermore, the dose-escalation regimen approved for semaglutide has  
56  
57 384 been shown to mitigate these AEs.(47) In the subgroups in the present analyses, GI AEs  
58  
59 385 were higher with dulaglutide 1.5 mg versus semaglutide 1.0 mg in elderly subjects with  
60

1  
2  
3 386 longer diabetes duration, and lower in subjects with HbA<sub>1c</sub> >8.5% (69 mmol/mol) and  
4  
5 387 higher BMI. There were no other associations between subjects' baseline characteristics  
6  
7 388 with the incidence of GI AEs. Subjects who experience GI AEs, specifically nausea and  
8  
9 389 vomiting, have greater weight loss compared with those who do not.(23,48) While this  
10  
11 390 hypothesised association might be considered an explanation for the observed greater  
12  
13 391 weight loss with semaglutide versus dulaglutide in the low-dose comparison, a mediation  
14  
15 392 analysis has previously shown that the direct effects of semaglutide on BW are the main  
16  
17 393 contributors to weight loss with very little effect attributable to GI AEs.(48,49). Our  
18  
19 394 analyses support this finding as, overall, there were no clear trends between the  
20  
21 395 incidence of GI AEs and the greater efficacy of semaglutide in terms of HbA<sub>1c</sub> reduction  
22  
23 396 and weight loss versus dulaglutide.(31) With semaglutide, there was a trend towards  
24  
25 397 decreasing GI AEs with increasing baseline BMI, which has also been previously reported  
26  
27 398 for the SUSTAIN 1–5 (23) and the AWARD 1–6 (50) trials, and may be due to differences  
28  
29 399 in exposure–response levels associated with BW as has been demonstrated with  
30  
31 400 semaglutide.(51) Similarly, an analysis has shown that elderly patients with a lower BMI  
32  
33 401 are more likely to experience side effects (including GI AEs) with dulaglutide than  
34  
35 402 younger patients with a higher BMI.(50) However, it is noted that this was a *post hoc*  
36  
37 403 analysis in Japanese patients, with low event rates for some GI AEs, and so the results  
38  
39 404 may not be generalizable to a wider diabetes population. In either case, a dose-  
40  
41 405 escalation regimen may be beneficial.

42  
43  
44 406 A strength of the present analysis is the inclusion of comparator data, which allows for a  
45  
46 407 more robust analysis and direct comparison of the differences in efficacy and safety of  
47  
48 408 semaglutide versus dulaglutide across the subgroups and subgroup categories, and also  
49  
50 409 the use of multiple imputation that helps to conserve randomisation. However, the *post*  
51  
52 410 *hoc* nature of this analysis means there are inherent limitations and, as such, the data  
53  
54 411 should be interpreted with caution. Also, as the analysis is based on SUSTAIN 7 alone, it  
55  
56 412 may only be representative of the trial-specific patient population. A further limitation is  
57  
58 413 the relatively small number of subjects in each subgroup category, which means that the  
59  
60

1  
2  
3 414 findings should be interpreted with caution. Additionally, in the age subgroups, there was  
4  
5 415 an imbalance in subject numbers (elderly versus non-elderly), with relatively few  
6  
7 416 patients in the elderly subgroup (260; 22% of the analysis population). However, given  
8  
9 417 the overall consistency of the age-subgroup analyses, as well as the general limitations  
10  
11 418 of these *post hoc* analyses, the difference in subject numbers between the age subgroup  
12  
13 419 categories seemed to have had little or no impact. Furthermore, elderly subjects in  
14  
15 420 previous pooled analyses of the SUSTAIN 1-5 (26) and AWARD (30,32) trials have  
16  
17 421 demonstrated similar efficacy and safety, supporting the results obtained here.  
18  
19  
20 422 Understanding the impact of heterogeneity in patient characteristics on treatment effects  
21  
22 423 is important for clinical practice. This analysis provides insight on the influence of five of  
23  
24 424 the most common and relevant patient-level factors from a clinical perspective and  
25  
26 425 highlights semaglutide as an effective choice across these patient subgroups that are  
27  
28 426 commonly encountered in clinical practice.  
29

30 427

## 31 32 33 428 **CONCLUSIONS**

34  
35 429 Semaglutide was associated with superior efficacy to dulaglutide across various clinically  
36  
37 430 relevant patient subgroups that are commonly encountered in clinical practice, with a  
38  
39 431 safety profile similar to other GLP-1RAs and in line with previously published data for  
40  
41 432 semaglutide. The treatment effect for semaglutide versus dulaglutide did not appear to  
42  
43 433 be influenced by age, sex, diabetes duration, HbA<sub>1c</sub> or BMI at baseline. Together with  
44  
45 434 results from other studies and from experience in clinical practice, these findings support  
46  
47 435 the efficacy of semaglutide across the continuum of care in a heterogeneous T2D  
48  
49 436 population.  
50

51 437

## 52 53 54 438 **ACKNOWLEDGEMENTS**

55  
56  
57 439 We thank all the trial subjects, investigators and trial-site staff members who were  
58  
59 440 involved in the SUSTAIN trials; Charlotte Hindsberger and Thomas Hansen (both  
60

1  
2  
3 441 Novo Nordisk) for review and suggestions for revising the manuscript; and  
4  
5 442 Stacy Carl-McGrath (AXON Communications) for medical writing and editorial assistance.  
6  
7 443 This study and the associated trials were supported by Novo Nordisk A/S, Denmark. The  
8  
9 444 funding sources contributed to the design and conduct of the trials, the analysis and  
10  
11 445 interpretation of the data and the preparation, review and approval of the manuscript.  
12  
13  
14 446

### 16 447 **COMPETING INTERESTS**

18  
19 448 The authors received no grants or funding for the writing of this article. In relation to the  
20  
21 449 submitted work, RP reports grants from Novo Nordisk to his institution, AdventHealth, a  
22  
23 450 nonprofit organisation, and VA also reports grants from Novo Nordisk to her institution.  
24  
25 451 Outside of this work, RP reports speaker and consulting fees from AstraZeneca;  
26  
27 452 consulting fees from Boehringer Ingelheim; consulting fees from Eisai, Inc.; consulting  
28  
29 453 fees from GlaxoSmithKline; consulting fees from Glytec, LLC; consulting fees from  
30  
31 454 Janssen; grants from Lexicon Pharmaceuticals; grants and consulting fees from Ligand  
32  
33 455 Pharmaceuticals, Inc., grants and consulting fees from Lilly; grants and consulting fees  
34  
35 456 from Merck; consulting fees from Mundipharma; grants, speaker fees and consulting fees  
36  
37 457 from Novo Nordisk; consulting fees from Pfizer; grants and consulting fees from Sanofi;  
38  
39 458 grants, speaker fees and consulting fees from Takeda; and personal consulting fees from  
40  
41 459 Sanofi US Services, Inc. Except for consulting fees in February 2018 and June 2018 from  
42  
43 460 Sanofi US Services, Inc., RP's services were paid for directly to AdventHealth. VA has  
44  
45 461 received consulting fees (to her institution) from Adocia; grants (to her institution) and  
46  
47 462 consulting fees (to her institution) from AstraZeneca/BMS; consulting fees from Becton-  
48  
49 463 Dickinson; grants (to her institution) from Boehringer Ingelheim; grants (to her  
50  
51 464 institution) from Calibra; consulting fees from Duke University; grants (to her institution)  
52  
53 465 from Eisai; grants (to her institution) from Fractyl; grants (to her institution) from  
54  
55 466 Janssen; grants (to her institution) and consulting fees from Novo Nordisk; grants (to  
56  
57 467 her institution) and consulting fees from Sanofi; grants (to her institution) from  
58  
59 468 Theracos; and consulting fees from Zafgen, all outside of the submitted work; and is the

1  
2  
3 469 spouse of an employee of Merck Research Laboratories. AMC is an employee of  
4  
5 470 Novo Nordisk. In relation to the submitted work, IL reports grants to her institution from  
6  
7 471 Novo Nordisk. Outside of the submitted work, IL has received consulting fees from  
8  
9 472 AstraZeneca; consulting fees from Boehringer Ingelheim; grants from GI Dynamics;  
10  
11 473 consulting fees from Intarcia; consulting fees from Janssen; consulting fees from Lilly;  
12  
13 474 consulting fees from Mannkind; grants from Merck; grants from Mylan; grants from  
14  
15 475 Novartis; grants and consulting fees from Novo Nordisk; grants from Pfizer; consulting  
16  
17 476 fees from Sanofi; consultant fees from TARGETPharma; and consulting fees from  
18  
19 477 Valeritas, all outside of the submitted work. JL reports being an investigator in clinical  
20  
21 478 studies for Eli Lilly and Novo Nordisk outside of the submitted work. EY is an employee  
22  
23 479 and minor shareholder of Novo Nordisk. AV has received lecture/other fees and non-  
24  
25 480 financial (clinical research) support from AstraZeneca; non-financial (clinical research)  
26  
27 481 support from Amgen; lecture/other fees from Boehringer Ingelheim; lecture/other fees  
28  
29 482 and non-financial (clinical research) support from Eli Lilly; lecture/other fees from  
30  
31 483 Merck Sharp & Dohme; lecture/other fees from Napp, lecture/other fees and non-  
32  
33 484 financial (clinical research) support from Novo Nordisk; non-financial (clinical research)  
34  
35 485 support from Novartis; and lecture/other fees and non-financial (clinical research)  
36  
37 486 support from Sanofi, all outside of the submitted work.  
38  
39  
40  
41

487

#### 488 **FUNDING**

489 This work was supported by Novo Nordisk A/S. Editorial support was provided by Stacy  
490 Carl-McGrath PhD (AXON Communications), funded by Novo Nordisk A/S.

491

#### 492 **DATA SHARING STATEMENT**

493 Individual participant data will be shared in datasets in a deidentified format, including  
494 datasets from Novo Nordisk-sponsored clinical research completed after 2001 for product  
495 indications approved in both the European Union and USA. The study protocol and



1  
2  
3 496 redacted clinical study report will be available according to Novo Nordisk data sharing  
4  
5 497 commitments. Data will be available permanently after research completion and  
6  
7 498 approval of product and product use in the European Union and USA. Data will only be  
8  
9 499 shared with *bona fide* researchers submitting a research proposal and requesting access  
10  
11 500 to data, for use as approved by the independent review board and according to its  
12  
13 501 charter. The access request proposal form and the access criteria can be found online.  
14  
15 502 Data will be made available on a specialised Statistical Analysis System data platform.  
16  
17  
18 503

#### 20 504 **AUTHOR CONTRIBUTIONS**

22  
23 505 RP: conduct of trial, data collection, data analysis, data interpretation, manuscript  
24  
25 506 preparation, approval of submitted version; VA: conduct of trial, data collection, data  
26  
27 507 interpretation, manuscript preparation, approval of submitted version; AMC: data  
28  
29 508 interpretation, manuscript preparation, approval of submitted version; IL: conduct of  
30  
31 509 trial, data collection, data interpretation, manuscript preparation, approval of submitted  
32  
33 510 version; JL: conduct of the trial, data collection, data interpretation, manuscript  
34  
35 511 preparation, approval of submitted version; EY: data interpretation, manuscript  
36  
37 512 preparation, approval of submitted version; AV: data interpretation, manuscript  
38  
39 513 preparation, approval of submitted version.  
40  
41  
42  
43  
44  
45  
46  
47  
48  
49  
50  
51  
52  
53  
54  
55  
56  
57  
58  
59  
60



514 **REFERENCES**

- 515 1. American Diabetes Association. Standards of Medical Care in Diabetes–2019.  
516 *Diabetes Care*. 2019;42(Suppl 1).
- 517 2. Cosentino F, Grant PJ, Aboyans V, et al. 2019 ESC Guidelines on diabetes, pre-  
518 diabetes, and cardiovascular diseases developed in collaboration with the EASD. *Eur*  
519 *Heart J* 2019; doi: 10.1093/eurheartj/ehz486. [Epub ahead of print].
- 520 3. Ahlqvist E, Storm P, Käräjämäki A, et al. Novel subgroups of adult-onset diabetes  
521 and their association with outcomes: a data-driven cluster analysis of six variables.  
522 *Lancet Diabetes Endocrinol* 2018;6(5):361–9.
- 523 4. Pearson ER. Type 2 diabetes: a multifaceted disease. *Diabetologia*  
524 2019;62(7):1107–12.
- 525 5. Dennis JM, Shields BM, Henley WE, et al. Disease progression and treatment  
526 response in data-driven subgroups of type 2 diabetes compared with models based  
527 on simple clinical features: an analysis using clinical trial data. *Lancet Diabetes*  
528 *Endocrinol* 2019;7(6):442–51.
- 529 6. Rodbard HW, Lingvay I, Reed J, et al. Semaglutide added to basal insulin in type 2  
530 diabetes (SUSTAIN 5): a randomized, controlled trial. *J Clin Endocrinol Metab*  
531 2018;103(6):2291–301.
- 532 7. Sorli C, Harashima SI, Tsoukas GM, et al. Efficacy and safety of once-weekly  
533 semaglutide monotherapy versus placebo in patients with type 2 diabetes (SUSTAIN  
534 1): a double-blind, randomised, placebo-controlled, parallel-group, multinational,  
535 multicentre phase 3a trial. *Lancet Diabetes Endocrinol* 2017;5(4):251–60.
- 536 8. Ahmann AJ, Capehorn M, Charpentier G, et al. Efficacy and safety of once-weekly  
537 semaglutide versus exenatide ER in subjects with type 2 diabetes (SUSTAIN 3): a  
538 56-week, open-label, randomized clinical trial. *Diabetes Care* 2018;41(2):258–66.
- 539 9. Ahrén B, Masmiquel L, Kumar H, et al. Efficacy and safety of once-weekly  
540 semaglutide versus once-daily sitagliptin as an add-on to metformin,  
541 thiazolidinediones, or both, in patients with type 2 diabetes (SUSTAIN 2): a 56-  
542 week, double-blind, phase 3a, randomised trial. *Lancet Diabetes Endocrinol*  
543 2017;5(5):341–54.
- 544 10. Aroda VR, Bain SC, Cariou B, et al. Efficacy and safety of once-weekly semaglutide  
545 versus once-daily insulin glargine as add-on to metformin (with or without  
546 sulfonylureas) in insulin-naïve patients with type 2 diabetes (SUSTAIN 4): a

- 1  
2  
3 547 randomised, open-label, parallel-group, multicentre, multinational, phase 3a trial.  
4 548 *Lancet Diabetes Endocrinol* 2017;5(5):355–66.
- 6 549 11. Dungan KM, Weitgasser R, Perez Manghi F, et al. A 24-week study to evaluate the  
8 550 efficacy and safety of once-weekly dulaglutide added on to glimepiride in type 2  
9 551 diabetes (AWARD-8). *Diabetes Obes Metab* 2016;18(5):475–82.
- 11 552 12. Ludvik B, Frías JP, Tinahones FJ, et al. Dulaglutide as add-on therapy to SGLT2  
13 553 inhibitors in patients with inadequately controlled type 2 diabetes (AWARD-10): a  
14 554 24-week, randomised, double-blind, placebo-controlled trial. *Lancet Diabetes*  
16 555 *Endocrinol* 2018;6(5):370–81.
- 18 556 13. Tuttle KR, Lakshmanan MC, Rayner B, et al. Dulaglutide versus insulin glargine in  
19 557 patients with type 2 diabetes and moderate-to-severe chronic kidney disease  
21 558 (AWARD-7): a multicentre, open-label, randomised trial. *Lancet Diabetes Endocrinol*  
23 559 2018;6(8):605–17.
- 25 560 14. Wysham C, Blevins T, Arakaki R, et al. Efficacy and safety of dulaglutide added onto  
26 561 pioglitazone and metformin versus exenatide in type 2 diabetes in a randomized  
27 562 controlled trial (AWARD-1). *Diabetes Care* 2014;37(8):2159–67.
- 30 563 15. Umpierrez G, Tofé Povedano S, Pérez Manghi F, et al. Efficacy and safety of  
31 564 dulaglutide monotherapy versus metformin in type 2 diabetes in a randomized  
32 565 controlled trial (AWARD-3). *Diabetes Care* 2014;37(8):2168–76.
- 35 566 16. Nauck M, Weinstock RS, Umpierrez GE, et al. Efficacy and safety of dulaglutide  
36 567 versus sitagliptin after 52 weeks in type 2 diabetes in a randomized controlled trial  
37 568 (AWARD-5). *Diabetes Care* 2014;37(8):2149–58.
- 40 569 17. Giorgino F, Benroubi M, Sun JH, et al. Efficacy and safety of once-weekly dulaglutide  
41 570 versus insulin glargine in patients with type 2 diabetes on metformin and glimepiride  
42 571 (AWARD-2). *Diabetes Care* 2015;38(12):2241–9.
- 45 572 18. Blonde L, Jendle J, Gross J, et al. Once-weekly dulaglutide versus bedtime insulin  
46 573 glargine, both in combination with prandial insulin lispro, in patients with type 2  
47 574 diabetes (AWARD-4): a randomised, open-label, phase 3, non-inferiority study.  
48 575 *Lancet* 2015;385(9982):2057–66.
- 51 576 19. Dungan KM, Povedano ST, Forst T, et al. Once-weekly dulaglutide versus once-daily  
52 577 liraglutide in metformin-treated patients with type 2 diabetes (AWARD-6): a  
53 578 randomised, open-label, phase 3, non-inferiority trial. *Lancet*  
55 579 2014;384(9951):1349–57.
- 58 580 20. Pozzilli P, Norwood P, Jódar E, et al. Placebo-controlled, randomized trial of the  
59 581 addition of once-weekly glucagon-like peptide-1 receptor agonist dulaglutide to

- 1  
2  
3 582 titrated daily insulin glargine in patients with type 2 diabetes (AWARD-9). *Diabetes*  
4 583 *Obes Metab* 2017;19(7):1024–31.
- 5  
6  
7 584 21. Marso SP, Bain SC, Consoli A, et al. Semaglutide and cardiovascular outcomes in  
8 585 patients with type 2 diabetes. *N Engl J Med* 2016;375(19):1834–44.
- 9  
10 586 22. Gerstein HC, Colhoun HM, Dagenais GR, et al. Dulaglutide and cardiovascular  
11 587 outcomes in type 2 diabetes (REWIND): a double-blind, randomised placebo-  
12 588 controlled trial. *Lancet* 2019;394(10193):121–30.
- 13  
14  
15 589 23. Ahrén B, Atkin SL, Charpentier G, et al. Semaglutide induces weight loss in subjects  
16 590 with type 2 diabetes regardless of baseline BMI or gastrointestinal adverse events in  
17 591 the SUSTAIN 1 to 5 trials. *Diabetes Obes Metab* 2018;20(9):2210–9.
- 18  
19  
20 592 24. Bain SC, Araki E, Desouza C, et al. Semaglutide reduces HbA<sub>1c</sub> across baseline HbA<sub>1c</sub>  
21 593 subgroups in the SUSTAIN 1–5 clinical trials. 77th Scientific Sessions of the  
22 594 American Diabetes Association, San Diego, CA, USA, June 9–13, 2017 (Poster  
23 595 1123P).
- 24  
25  
26 596 25. Warren M, Chaykin L, Trachtenbarg D, et al. Semaglutide as a therapeutic option for  
27 597 elderly patients with type 2 diabetes: pooled analysis of the SUSTAIN 1-5 trials.  
28 598 *Diabetes Obes Metab* 2018;20(9):2291–7.
- 29  
30  
31 599 26. Rosenstock J, Chaykin L, Lüdemann J, et al. Consistent HbA<sub>1c</sub> and body weight  
32 600 reduction with semaglutide independent of diabetes duration: SUSTAIN 1–5 and 7  
33 601 patient-level meta-analysis. 78th Scientific Sessions of the American Diabetes  
34 602 Association, Orlando, FL, USA, 22–26 June, 2018 (Poster 1081-P).
- 35  
36  
37 603 27. Hramiak I, Desouza C, Seufert J, et al. Semaglutide consistently reduces  
38 604 cardiovascular events in both male and female subjects with type 2 diabetes. 78th  
39 605 Scientific Sessions of the American Diabetes Association, Orlando, FL, USA, 22–26  
40 606 June, 2018 (Poster 1085-P).
- 41  
42  
43 607 28. Desouza C, Garg SK, Cariou B, et al. Efficacy and safety of semaglutide in subjects  
44 608 with type 2 diabetes across race and ethnicity subgroups: a *post hoc* analysis of the  
45 609 SUSTAIN trials. 27th Annual Scientific & Clinical Congress of the American  
46 610 Association of Clinical Endocrinologists, Boston, MA, USA, 16–20 May, 2018 (Poster  
47 611 298).
- 48  
49  
50 612 29. Wysham C, Guerci B, D'Alessio D, et al. Baseline factors associated with glycaemic  
51 613 response to treatment with once-weekly dulaglutide in patients with type 2 diabetes.  
52 614 *Diabetes Obes Metab* 2016;18(11):1138–42.
- 53  
54  
55  
56  
57  
58  
59  
60

- 1  
2  
3 615 30. Boustani MA, Pittman I 4th, Yu M, et al. Similar efficacy and safety of once-weekly  
4 616 dulaglutide in patients with type 2 diabetes aged  $\geq 65$  and  $< 65$  years. *Diabetes Obes*  
5 617 *Metab* 2016;18(8):820–8.  
6  
7  
8 618 31. Gallwitz B, Dagogo-Jack S, et al. Effect of once-weekly dulaglutide on glycosylated  
9 619 haemoglobin (HbA<sub>1c</sub>) and fasting blood glucose in patient subpopulations by gender,  
10 620 duration of diabetes and baseline HbA<sub>1c</sub>. *Diabetes Obes Metab* 2018;20(2):409–18.  
11  
12  
13 621 32. Pantalone KM, Patel H, Yu M, et al. Dulaglutide 1.5 mg as an add-on option for  
14 622 patients uncontrolled on insulin: subgroup analysis by age, duration of diabetes and  
15 623 baseline glycosylated haemoglobin concentration. *Diabetes Obes Metab*  
16 624 2018;20(6):1461–9.  
17  
18  
19 625 33. Gentilella R, Romera I, Nicolay C, et al. Change in HbA<sub>1c</sub> across the baseline HbA<sub>1c</sub>  
20 626 range in type 2 diabetes patients receiving once-weekly dulaglutide versus other  
21 627 incretin agents. *Diabetes Ther* 2019;10(3):1113–25.  
22  
23  
24 628 34. Mathieu C, Del Prato S, Botros FT, et al. Effect of once weekly dulaglutide by  
25 629 baseline beta-cell function in people with type 2 diabetes in the AWARD programme.  
26 630 *Diabetes Obes Metab* 2018;20(8):2023–8.  
27  
28  
29 631 35. Fuechtenbusch M, Aberle J, Heitmann E, et al. Weight loss in patients with type 2  
30 632 diabetes receiving once-weekly dulaglutide plus insulin lispro or insulin glargine plus  
31 633 insulin lispro: a post-hoc analysis of the AWARD-4 study across baseline body mass  
32 634 index subgroups. *Diabetes Obes Metab* 2019;21(6):1340–8.  
33  
34  
35 635 36. Pratley RE, Aroda VR, Lingvay I, et al. Semaglutide versus dulaglutide once weekly  
36 636 in patients with type 2 diabetes (SUSTAIN 7): a randomised, open-label, phase 3b  
37 637 trial. *Lancet Diabetes Endocrinol* 2018;6(4):275–86.  
38  
39  
40 638 37. Jendle J, Grunberger G, Blevins T, et al. Efficacy and safety of dulaglutide in the  
41 639 treatment of type 2 diabetes: a comprehensive review of the dulaglutide clinical data  
42 640 focusing on the AWARD phase 3 clinical trial program. *Diabetes Metab Res Rev*  
43 641 2016;32(8):776–90.  
44  
45  
46 642 38. Little RJA, Rubin DB. Statistical analysis with missing data. New York: John Wiley &  
47 643 Sons, 1987.  
48  
49  
50 644 39. Henry RR, Buse JB, Sesti G, et al. Efficacy of antihyperglycemic therapies and the  
51 645 influence of baseline hemoglobin A(1C): a meta-analysis of the liraglutide  
52 646 development program. *Endocr Pract* 2011;17(6):906–13.  
53  
54  
55 647 40. Blonde L, Chava P, Dex T, et al. Predictors of outcomes in patients with type 2  
56 648 diabetes in the lixisenatide GetGoal clinical trials. *Diabetes Obes Metab*  
57 649 2017;19(2):275–83.

- 1  
2  
3 650 41. Dahlqvist S, Ahlén E, Filipsson K, et al. Variables associated with HbA1c and weight  
4 651 reductions when adding liraglutide to multiple daily insulin injections in persons with  
5 652 type 2 diabetes (MDI Liraglutide trial 3). *BMJ Open Diabetes Res Care*  
6 653 2018;6(1):e000464.
- 7  
8  
9 654 42. Frías JP, Hardy E, Ahmed A, et al. Effects of exenatide once weekly plus  
10 655 dapagliflozin, exenatide once weekly alone, or dapagliflozin alone added to  
11 656 metformin monotherapy in subgroups of patients with type 2 diabetes in the  
12 657 DURATION-8 randomized controlled trial. *Diabetes Obes Metab* 2018;20(6):1520–5.
- 13  
14 658 43. Umpierrez GE, Pantalone KM, Kwan AY, et al. Relationship between weight change  
15 659 and glycaemic control in patients with type 2 diabetes receiving once-weekly  
16 660 dulaglutide treatment. *Diabetes Obes Metab* 2016;18(6):615–22.
- 17  
18 661 44. Pi-Sunyer FX. Weight loss in type 2 diabetic patients. *Diabetes Care*  
19 662 2005;28(6):1526–27.
- 20  
21 663 45. Fonseca VA, Capehorn MS, Garg SK, et al. Reductions in insulin resistance are  
22 664 mediated primarily via weight loss in subjects with type 2 diabetes on semaglutide. *J*  
23 665 *Clin Endocrinol Metab* 2019. doi: 10.1210/jc.2018-02685. [Epub ahead of print].
- 24  
25 666 46. Bettge K, Kahle M, Abd El Aziz MS, et al. Occurrence of nausea, vomiting and  
26 667 diarrhoea reported as adverse events in clinical trials studying glucagon-like peptide-  
27 668 1 receptor agonists: a systematic analysis of published clinical trials. *Diabetes Obes*  
28 669 *Metab* 2017;19(3):336–47.
- 29  
30 670 47. Nauck MA, Petrie JR, Sesti G, et al. A phase 2, randomized, dose-finding study of the  
31 671 novel once-weekly human GLP-1 analog, semaglutide, compared with placebo and  
32 672 open-label liraglutide in patients with type 2 diabetes. *Diabetes Care*  
33 673 2016;39(2):231–41.
- 34  
35 674 48. Atkin S, Woo V, de la Rosa R, et al. The impact of gastrointestinal adverse events on  
36 675 weight loss with semaglutide in subjects with type 2 diabetes. 53rd Annual Meeting  
37 676 of the European Association for the Study of Diabetes (EASD), Lisbon, Portugal,  
38 677 11–15 September 2017 (Poster 821).
- 39  
40 678 49. Ahrén B, Atkin SL, Charpentier G, et al. Semaglutide induces weight loss in subjects  
41 679 with type 2 diabetes regardless of baseline BMI or gastrointestinal adverse events in  
42 680 the SUSTAIN 1 to 5 trials. *Diabetes Obes Metab* 2018;20(9):2210–9.
- 43  
44 681 50. Hamano K, Nishiyama H, Matsui A, et al. Efficacy and safety analyses across 4  
45 682 subgroups combining low and high age and body mass index groups in Japanese  
46 683 phase 3 studies of dulaglutide 0.75 mg after 26 weeks of treatment. *Endocr J*  
47 684 2017;64(4):449–45.
- 48  
49  
50  
51  
52  
53  
54  
55  
56  
57  
58  
59  
60

1  
2  
3  
4  
5  
6  
7  
8  
9  
10  
11  
12  
13  
14  
15  
16  
17  
18  
19  
20  
21  
22  
23  
24  
25  
26  
27  
28  
29  
30  
31  
32  
33  
34  
35  
36  
37  
38  
39  
40  
41  
42  
43  
44  
45  
46  
47  
48  
49  
50  
51  
52  
53  
54  
55  
56  
57  
58  
59  
60

685 51. Petri KCC, Ingwersen SH, Flint A, et al. Exposure-response analysis for evaluation of  
686 semaglutide dose levels in type 2 diabetes. *Diabetes Obes Metab* 2018;20(9):  
687 2238–45.

For peer review only

## Figure Legends

**Figure 1. Proportion of subjects achieving HbA<sub>1c</sub> < 7.0% (53 mmol/mol; A, C, E, G and I) and HbA<sub>1c</sub> ≤6.5% (48 mmol/mol; B, D, F, H and J) at 40 weeks.** \*p<0.05,

\*\*p<0.001, \*\*\*p<0.0001. Values are estimated proportions from ANCOVAs with multiple imputations using 'on-treatment without rescue medication' data from all randomised subjects exposed to at least one dose of trial product as randomised (full analysis set) obtained while on treatment and prior to onset of rescue medication. P-values are based on ETDs; statistical analyses were not performed for change from baseline. ANCOVA: analysis of covariance; BMI: body mass index; BW: body weight; ETD: estimated treatment differences; HbA<sub>1c</sub>: glycated haemoglobin.

**Figure 2. Proportion of subjects achieving weight loss ≥5% (A, C, E, G and I) and weight loss ≥10% (B, D, F, H and J) at 40 weeks**

\*p<0.05, \*\*p<0.001, \*\*\*p<0.0001. Values are estimated proportions from ANCOVAs with multiple imputations using 'on-treatment without rescue medication' data from all randomised subjects exposed to at least one dose of trial product as randomised (full analysis set) obtained while on treatment and prior to onset of rescue medication. P-values are based on ETDs; statistical analyses were not performed for change from baseline. ANCOVA: analysis of covariance; BMI: body mass index; BW: body weight; ETD: estimated treatment difference.

**Figure 3. Estimated treatment differences for change from baseline in HbA<sub>1c</sub> shown as %-points (A), HbA<sub>1c</sub> shown as mmol/mol (B) and body weight (C) at week 40 by age, sex, diabetes duration, HbA<sub>1c</sub> and BMI at baseline.** \*p<0.05, \*\*p<0.001, \*\*\*p<0.0001; †p-values represent the test for treatment by subgroup interaction. Values are ETDs [95% CIs] for semaglutide versus dulaglutide (low-dose comparison [semaglutide 0.5 mg versus dulaglutide 0.75 mg] and high-dose comparison



1  
2  
3 [semaglutide 1.0 mg versus dulaglutide 1.5 mg]) from ANCOVAs with multiple imputations  
4  
5 using data from all randomised subjects exposed to at least one dose of trial product and  
6  
7 did not discontinue treatment or receive any non-investigational antihyperglycaemic  
8  
9 treatment (full analysis set) obtained while on treatment and prior to onset of rescue  
10  
11 medication. ANCOVA controlled for baseline HbA<sub>1c</sub> (A) or body weight (B) and interaction  
12  
13 between randomised treatment and subgroup. ANCOVA: analysis of covariance; BMI: body  
14  
15 mass index; CI: confidence interval; ETD: estimated treatment difference; HbA<sub>1c</sub>: glycated  
16  
17 haemoglobin.  
18  
19  
20  
21  
22  
23  
24  
25  
26  
27  
28  
29  
30  
31  
32  
33  
34  
35  
36  
37  
38  
39  
40  
41  
42  
43  
44  
45  
46  
47  
48  
49  
50  
51  
52  
53  
54  
55  
56  
57  
58  
59  
60



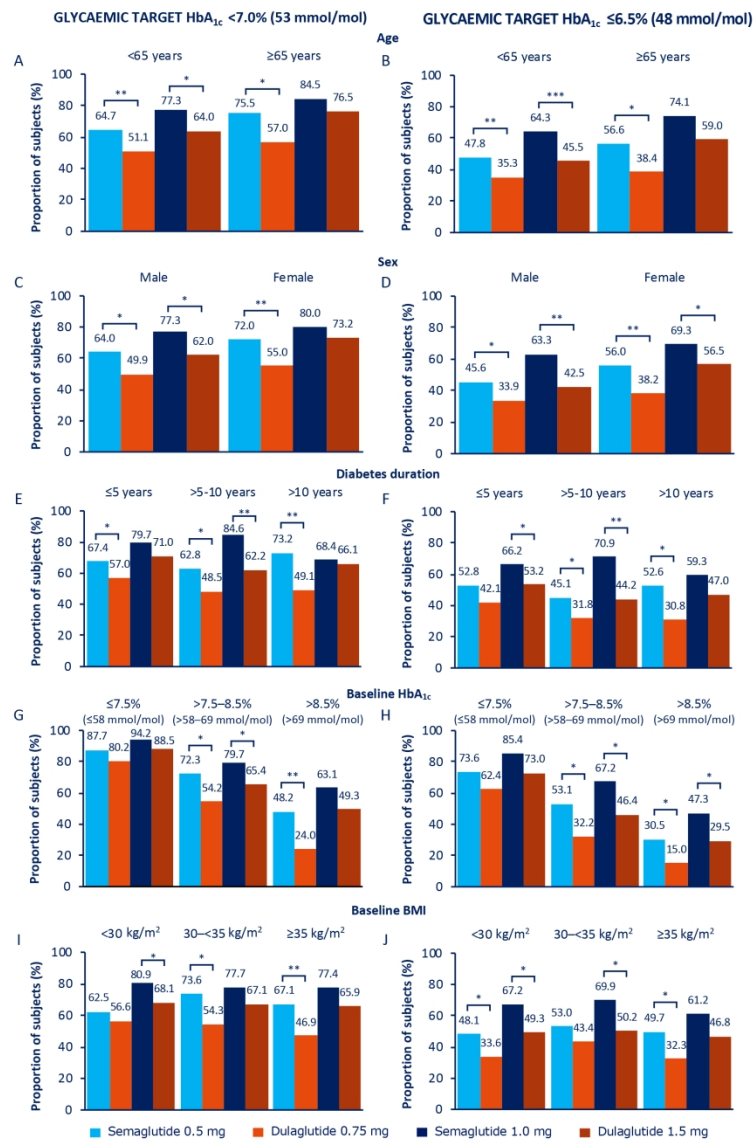

Figure 1. Proportion of subjects achieving HbA<sub>1c</sub> < 7.0% (53 mmol/mol; A, C, E, G and I) and HbA<sub>1c</sub> ≤6.5% (48 mmol/mol; B, D, F, H and J) at 40 weeks. \*p<0.05, \*\*p<0.001, \*\*\*p<0.0001. Values are estimated proportions from ANCOVAs with multiple imputations using 'on-treatment without rescue medication' data from all randomised subjects exposed to at least one dose of trial product as randomised (full analysis set) obtained while on treatment and prior to onset of rescue medication. P-values are based on ETDs; statistical analyses were not performed for change from baseline. ANCOVA: analysis of covariance; BMI: body mass index; BW: body weight; ETD: estimated treatment differences; HbA<sub>1c</sub>: glycated haemoglobin.

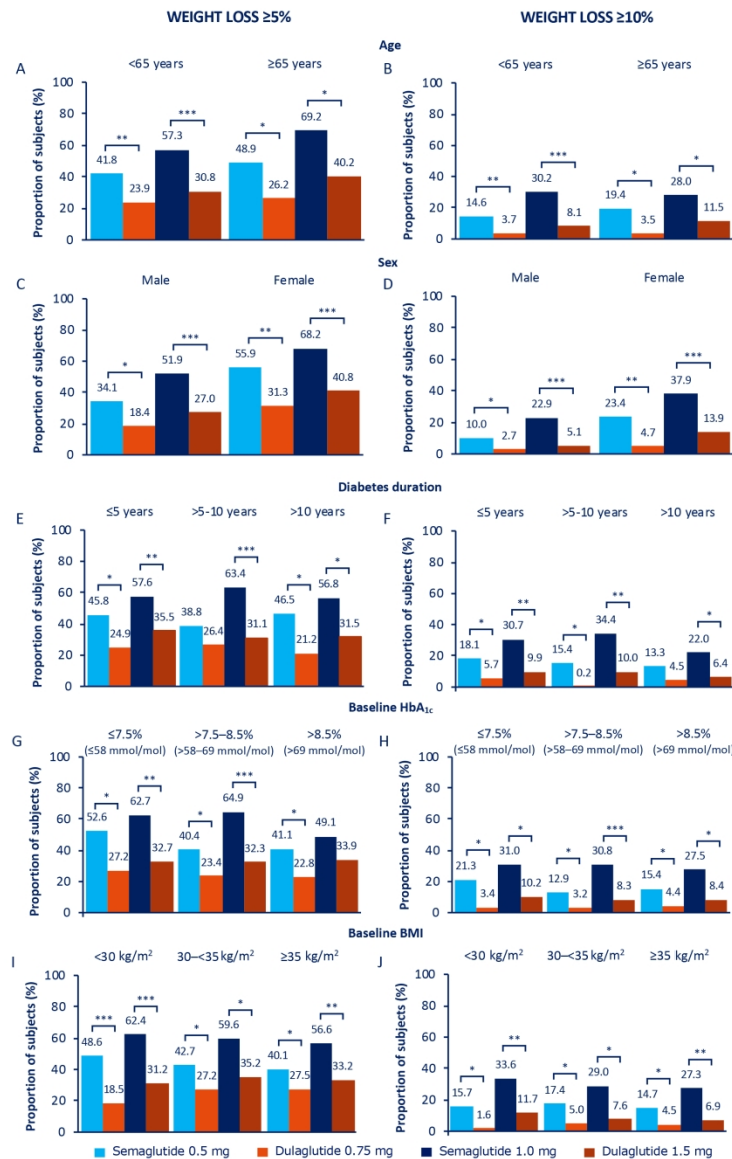

Figure 2. Proportion of subjects achieving weight loss  $\geq 5\%$  (A, C, E, G and I) and weight loss  $\geq 10\%$  (B, D, F, H and J) at 40 weeks. \* $p < 0.05$ , \*\* $p < 0.001$ , \*\*\* $p < 0.0001$ . Values are estimated proportions from ANCOVAs with multiple imputations using 'on-treatment without rescue medication' data from all randomised subjects exposed to at least one dose of trial product as randomised (full analysis set) obtained while on treatment and prior to onset of rescue medication. P-values are based on ETDs; statistical analyses were not performed for change from baseline. ANCOVA: analysis of covariance; BMI: body mass index; BW: body weight; ETD: estimated treatment difference.

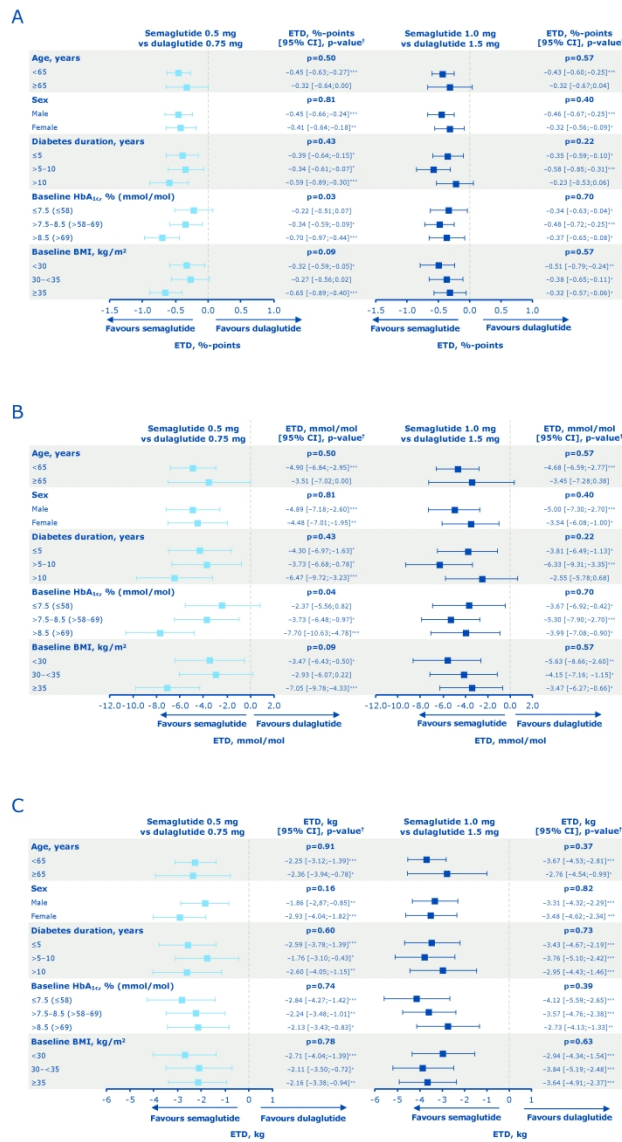

Figure 3. Estimated treatment differences for change from baseline in HbA<sub>1c</sub> shown as %-points (A), HbA<sub>1c</sub> shown as mmol/mol (B) and body weight (C) at week 40 by age, sex, diabetes duration, HbA<sub>1c</sub> and BMI at baseline. \*p<0.05, \*\*p<0.001, \*\*\*p<0.0001; †p values represent the test for treatment by subgroup interaction. Values are ETDs [95% CIs] for semaglutide versus dulaglutide (low-dose comparison [semaglutide 0.5 mg versus dulaglutide 0.75 mg] and high-dose comparison [semaglutide 1.0 mg versus dulaglutide 1.5 mg]) from ANCOVAs with multiple imputations using data from all randomised subjects exposed to at least one dose of trial product and did not discontinue treatment or receive any non-investigational antihyperglycaemic treatment (full analysis set) obtained while on treatment and prior to onset of rescue medication. ANCOVA controlled for baseline HbA<sub>1c</sub> (A) or body weight (B) and interaction between randomised treatment and subgroup. ANCOVA: analysis of covariance; BMI: body mass index; CI: confidence interval; ETD: estimated treatment difference; HbA<sub>1c</sub>: glycated haemoglobin.

## Supplementary Materials

### Full title:

Impact of patient characteristics on efficacy and safety of once-weekly semaglutide versus dulaglutide: SUSTAIN 7 *post hoc* analyses

### Authors:

Pratley Richard E<sup>1</sup>, Aroda Vanita R<sup>2</sup>, Catarig Andrei M<sup>3</sup>, Lingvay Ildiko<sup>4</sup>, Lüdemann Jörg<sup>5</sup>, Yildirim Emre<sup>3</sup>, Viljoen Adie<sup>6</sup>

### Author affiliations:

<sup>1</sup>AdventHealth Translational Research Institute for Metabolism and Diabetes, Orlando, FL, USA; <sup>2</sup>Brigham and Women's Hospital, Boston, MA, USA; <sup>3</sup>Novo Nordisk A/S, Søborg, Denmark; <sup>4</sup>University of Texas Southwestern Medical Center, Dallas, TX, USA; <sup>5</sup>diabetes-falkensee, Diabetes Centre and Centre for Clinical Studies, Falkensee, Germany; <sup>6</sup>Borthwick Diabetes Research Centre, Lister Hospital, Stevenage, UK

### Contact details for corresponding author:

Dr Richard E. Pratley

AdventHealth Translational Research Institute for Metabolism and Diabetes

301 E. Princeton Street, Orlando, FL 32804, USA

Phone: +1-407-303-2519

E-mail: [Richard.Pratley.MD@AdventHealth.com](mailto:Richard.Pratley.MD@AdventHealth.com)

1  
2  
3 **SUPPLEMENTARY SECTION I: INDEPENDENT ETHICS COMMITTEES**  
4  
5  
6  
7  
8  
9  
10  
11  
12  
13  
14  
15  
16  
17  
18  
19  
20  
21  
22  
23  
24  
25  
26  
27  
28  
29  
30  
31  
32  
33  
34  
35  
36  
37  
38  
39  
40  
41  
42  
43  
44  
45  
46  
47  
48  
49  
50  
51  
52  
53  
54  
55  
56  
57  
58  
59  
60

For peer review only

**Supplementary Table 1. Independent ethics committees for SUSTAIN 7**

| Country   | Independent ethics committees                                                                                                                                                                                                                                                                                                                                                                                                                                                                                                                                                                                                                                                                                                                                                                                                                                                                                                                                                                                                                                                                                                                                                                                                                                                                         |
|-----------|-------------------------------------------------------------------------------------------------------------------------------------------------------------------------------------------------------------------------------------------------------------------------------------------------------------------------------------------------------------------------------------------------------------------------------------------------------------------------------------------------------------------------------------------------------------------------------------------------------------------------------------------------------------------------------------------------------------------------------------------------------------------------------------------------------------------------------------------------------------------------------------------------------------------------------------------------------------------------------------------------------------------------------------------------------------------------------------------------------------------------------------------------------------------------------------------------------------------------------------------------------------------------------------------------------|
| Bulgaria  | <ul style="list-style-type: none"> <li>Ethics Committee for Multicenter Clinical Trials</li> </ul>                                                                                                                                                                                                                                                                                                                                                                                                                                                                                                                                                                                                                                                                                                                                                                                                                                                                                                                                                                                                                                                                                                                                                                                                    |
| Croatia   | <ul style="list-style-type: none"> <li>Agencija za lijekove i medicinske proizvode</li> </ul>                                                                                                                                                                                                                                                                                                                                                                                                                                                                                                                                                                                                                                                                                                                                                                                                                                                                                                                                                                                                                                                                                                                                                                                                         |
| Finland   | <ul style="list-style-type: none"> <li>Ethics Committee of the Hospital District of Southwest Finland</li> </ul>                                                                                                                                                                                                                                                                                                                                                                                                                                                                                                                                                                                                                                                                                                                                                                                                                                                                                                                                                                                                                                                                                                                                                                                      |
| Germany   | <ul style="list-style-type: none"> <li>Ethikkommission der Ärztekammer des Saarlandes</li> </ul>                                                                                                                                                                                                                                                                                                                                                                                                                                                                                                                                                                                                                                                                                                                                                                                                                                                                                                                                                                                                                                                                                                                                                                                                      |
| Greece    | <ul style="list-style-type: none"> <li>National Ethics Committee</li> <li>Private Clinic, Iatriko Palaiau Falirou</li> <li>General Hospital of Thessaloniki "G. Papanikolaou" Exohi</li> <li>General University Hospital of Chalkida</li> <li>General Hospital of Piraeus "Tzaneio" 1</li> <li>"THERMI" Clinic 14th km of National Road Thessaloniki</li> <li>General University Hospital of Thessaloniki "Ahepa" 1</li> <li>University Hospital of Ioannina</li> <li>Private Clinic, Iatriko Psychikou 1</li> </ul>                                                                                                                                                                                                                                                                                                                                                                                                                                                                                                                                                                                                                                                                                                                                                                                  |
| Hong Kong | <ul style="list-style-type: none"> <li>Joint Chinese University of Hong Kong – New Territories East Cluster Clinical Research Ethics Committee</li> </ul>                                                                                                                                                                                                                                                                                                                                                                                                                                                                                                                                                                                                                                                                                                                                                                                                                                                                                                                                                                                                                                                                                                                                             |
| India     | <ul style="list-style-type: none"> <li>Park Clinic Ethics Committee</li> <li>Institutional Ethics Committee, Amrita Institute of Medical and Research Centre</li> <li>Institutional Ethics Committee, Inamdar Multispeciality Hospital</li> <li>IPGME&amp;R Research Oversight Committee, Institute of Post-graduate Medical Education and Research</li> <li>Institutional Ethics Committee, Deenanath Mangeshkar Hospital and Research Centre</li> <li>Ethics Committee For Human Research, Lady Hardinge Medical College &amp; Associated Hospitals</li> <li>Institutional Human Ethics Committee, Office of the SOCOMER</li> <li>Institutional Ethics Committee, Goa Medical College</li> <li>Institutional Ethics Committee, Lokmanya Tilak Municipal Medical College</li> <li>Ethics Committee, Apollo Hospital</li> <li>Ethics Committee Silver, Christian Medical College</li> <li>Ethics Committee, Endolife Speciality Hospitals Pvt. Ltd</li> <li>Academic Research Projects, Medical College and BYL Nair Hospital</li> <li>Institutional Ethics Committee, M/s. King George Hospital</li> <li>Institutional Ethics Committee, Global Hospitals</li> <li>Ethics Committee, Marwari Hospital &amp; Research Center</li> <li>Integrity Ethics Committee, Convenient Hospitals Ltd</li> </ul> |

|           |                                                                                                                                                                                                                                                                                                                                                                                                                                                                                                                                                                                                                                                                                                                                                                                                        |
|-----------|--------------------------------------------------------------------------------------------------------------------------------------------------------------------------------------------------------------------------------------------------------------------------------------------------------------------------------------------------------------------------------------------------------------------------------------------------------------------------------------------------------------------------------------------------------------------------------------------------------------------------------------------------------------------------------------------------------------------------------------------------------------------------------------------------------|
|           | <ul style="list-style-type: none"> <li>• Institutional Ethics Committee of Madras, Diabetes Research Foundation</li> <li>• The JMSHF and BMRC Institutional Ethics Committee, The Jivraj Mehta Hospital</li> <li>• Institutional Ethics Committee, Fortis Hospital</li> <li>• Institutional Ethics Committee, Maulana Azad Medical College</li> <li>• Drug Trial Ethics Committee, Dayanand Medical College and Hospital</li> <li>• Ethics Committee of Bangalore, Medical College &amp; Research Institute</li> <li>• Institutional Ethics Committee, Osmania Medical College</li> <li>• Ethics Committee, Government Medical College</li> <li>• Institutional Ethics Committee, Postgraduate Institute of Medical Education &amp; Research</li> <li>• Institute of Ethics Committee AIIMS</li> </ul> |
| Ireland   | <ul style="list-style-type: none"> <li>• Clinical Research Ethics Committee of the Cork Teaching Hospitals</li> <li>• Mater Misericordiae Hospital</li> <li>• Galway University Hospital</li> <li>• Connolly Hospital</li> <li>• St Vincent's Healthcare Ethics and Medical Research Committee</li> <li>• The Palms Surgery</li> </ul>                                                                                                                                                                                                                                                                                                                                                                                                                                                                 |
| Latvia    | <ul style="list-style-type: none"> <li>• Ethics Committee for Clinical Research at Pauls Stradins Clinical University Hospital Development Society</li> </ul>                                                                                                                                                                                                                                                                                                                                                                                                                                                                                                                                                                                                                                          |
| Lithuania | <ul style="list-style-type: none"> <li>• Lithuanian Bioethics Committee</li> </ul>                                                                                                                                                                                                                                                                                                                                                                                                                                                                                                                                                                                                                                                                                                                     |
| Portugal  | <ul style="list-style-type: none"> <li>• Comissão de Ética para a Investigação Clínica</li> </ul>                                                                                                                                                                                                                                                                                                                                                                                                                                                                                                                                                                                                                                                                                                      |
| Romania   | <ul style="list-style-type: none"> <li>• National Bioethics Committee for Medicine and Medical Devices</li> </ul>                                                                                                                                                                                                                                                                                                                                                                                                                                                                                                                                                                                                                                                                                      |
| Slovakia  | <ul style="list-style-type: none"> <li>• Eticka komisia, Sabinovska 16</li> <li>• Eticka komisia, Nemocnica Svateho Michala, a.s. <b>(Central IEC)</b></li> <li>• Eticka komisia, Trencianskeho samospravného kraja</li> <li>• Eticka komisia, Nitrianskeho samospravného kraja</li> <li>• Etická komisia, Presovskeho samospravného kraja</li> <li>• Eticka komisia, Trnavskeho samospravného kraja</li> </ul>                                                                                                                                                                                                                                                                                                                                                                                        |
| Spain     | <ul style="list-style-type: none"> <li>• Comité Coordinador de Ética de la Investigación Biomédica de Andalucía</li> <li>• CEI Provincial de Málaga</li> </ul>                                                                                                                                                                                                                                                                                                                                                                                                                                                                                                                                                                                                                                         |
| UK        | <ul style="list-style-type: none"> <li>• NRES Committee East of England – Cambridge Central</li> <li>• Research and Development Department East and North Hertfordshire NHS Trust</li> <li>• RMG Office, NHS Cambridgeshire and Peterborough CCG</li> <li>• Clinical Research Network North Thames</li> <li>• East of England – Cambridge Central Research Ethics Committee</li> <li>• Room 4, 112, 1 West University of Bath</li> </ul>                                                                                                                                                                                                                                                                                                                                                               |

1  
2  
3  
4  
5  
6  
7  
8  
9  
10  
11  
12  
13  
14  
15  
16  
17  
18  
19  
20  
21  
22  
23  
24  
25  
26  
27  
28  
29  
30  
31  
32  
33  
34  
35  
36  
37  
38  
39  
40  
41  
42  
43  
44  
45  
46  
47  
48  
49  
50  
51  
52  
53  
54  
55  
56  
57  
58  
59  
60

|     |                                                                                                                                                                                                                                                                                                                       |
|-----|-----------------------------------------------------------------------------------------------------------------------------------------------------------------------------------------------------------------------------------------------------------------------------------------------------------------------|
|     | <ul style="list-style-type: none"><li>• Research and Development Department Clinical Trial Facility, Moorgreen Hospital</li><li>• R&amp;D Department, University Hospital Southampton NHS Foundation Trust</li></ul>                                                                                                  |
| USA | <ul style="list-style-type: none"><li>• Sterling Institutional Review Board</li><li>• Western International Review Board</li><li>• University of Texas Southwestern Medical Center Institutional Review Board</li><li>• Schulman Associates IRB, Inc.</li><li>• Florida Hospital Institutional Review Board</li></ul> |

For peer review only



1  
2  
3 **SUPPLEMENTARY SECTION II: BASELINE CHARACTERISTICS**  
4  
5  
6  
7  
8  
9  
10  
11  
12  
13  
14  
15  
16  
17  
18  
19  
20  
21  
22  
23  
24  
25  
26  
27  
28  
29  
30  
31  
32  
33  
34  
35  
36  
37  
38  
39  
40  
41  
42  
43  
44  
45  
46  
47  
48  
49  
50  
51  
52  
53  
54  
55  
56  
57  
58  
59  
60

For peer review only

**Supplementary Table 2. Baseline characteristics by sex subgroups**

|                              | All subjects | Male         |              |              |             | Female      |              |             |             |
|------------------------------|--------------|--------------|--------------|--------------|-------------|-------------|--------------|-------------|-------------|
|                              |              | Sema 0.5 mg  | Dula 0.75 mg | Sema 1.0 mg  | Dula 1.5 mg | Sema 0.5 mg | Dula 0.75 mg | Sema 1.0 mg | Dula 1.5 mg |
| <b>n</b>                     | <b>1,199</b> | <b>169</b>   | <b>160</b>   | <b>162</b>   | <b>171</b>  | <b>132</b>  | <b>139</b>   | <b>138</b>  | <b>128</b>  |
| Age, years                   | 56 (10.6)    | 57.0 (10.9)  | 55.6 (10.1)  | 55.6 (10.3)  | 56.8 (10.5) | 55.3 (10.9) | 54.9 (10.7)  | 55.1 (11.0) | 54.7 (10.7) |
| Sex, n (%)                   |              |              |              |              |             |             |              |             |             |
| Male                         | 662 (55.2)   | 169 (100)    | 160 (100)    | 162 (100)    | 171 (100)   | -           | -            | -           | -           |
| Female                       | 537 (44.8)   | -            | -            | -            | -           | 132 (100)   | 139 (100)    | 138 (100)   | 128 (100)   |
| Diabetes duration, years     | 7.4 (5.7)    | 7.8 (5.8)    | 7.1 (5.7)    | 7.4 (5.5)    | 8.0 (5.6)   | 7.7 (6.1)   | 6.9 (5.2)    | 7.1 (5.9)   | 7.2 (5.7)   |
| HbA <sub>1c</sub> , %        | 8.2 (0.9)    | 8.4 (1.0)    | 8.2 (0.9)    | 8.2 (0.9)    | 8.2 (0.8)   | 8.3 (1.0)   | 8.1 (0.9)    | 8.2 (0.9)   | 8.2 (1.0)   |
| HbA <sub>1c</sub> , mmol/mol | 66.4 (10.0)  | 67.8 (10.5)  | 66.2 (10.0)  | 66.0 (10.2)  | 65.8 (9.0)  | 67.1 (10.4) | 66.4 (9.9)   | 65.2 (9.9)  | 66.6 (10.6) |
| Body weight, kg              | 95.2 (22.6)  | 102.3 (23.9) | 100.6 (23.4) | 100.8 (21.0) | 96.9 (21.5) | 88.9 (23.0) | 89.9 (21.3)  | 89.3 (19.0) | 88.8 (21.3) |
| BMI, kg/m <sup>2</sup>       | 33.5 (6.8)   | 33.3 (6.8)   | 32.8 (6.6)   | 32.7 (6.2)   | 32.0 (5.8)  | 34.2 (7.5)  | 34.6 (7.2)   | 34.7 (6.7)  | 34.5 (7.2)  |
| Race, n (%)                  |              |              |              |              |             |             |              |             |             |
| Asian                        | 191 (15.9)   | 24 (14.2)    | 31 (19.4)    | 25 (15.4)    | 32 (18.7)   | 26 (19.7)   | 17 (12.2)    | 13 (9.4)    | 23 (18.0)   |
| Black/African American       | 70 (5.8)     | 5 (3.0)      | 4 (2.5)      | 7 (4.3)      | 6 (3.5)     | 12 (9.1)    | 13 (9.4)     | 11 (8.0)    | 12 (9.4)    |
| White                        | 928 (77.4)   | 139 (82.2)   | 124 (77.5)   | 130 (80.2)   | 128 (74.9)  | 94 (71.2)   | 108 (77.7)   | 113 (81.9)  | 92 (71.9)   |
| Other                        | 10 (0.8)     | 1 (0.6)      | 1 (0.6)      | 0            | 5 (2.9)     | 0           | 1 (0.7)      | 1 (0.7)     | 1 (0.8)     |
| Ethnic group, n (%)          |              |              |              |              |             |             |              |             |             |
| Hispanic/Latino              | 138 (11.5)   | 18 (10.7)    | 15 (9.4)     | 14 (8.6)     | 24 (14.0)   | 11 (8.3)    | 16 (11.5)    | 21 (15.2)   | 19 (14.8)   |
| Non-Hispanic/Latino          | 1,061 (88.5) | 151 (89.3)   | 145 (90.6)   | 148 (91.4)   | 147 (86.0)  | 121 (91.7)  | 123 (88.5)   | 117 (84.8)  | 109 (85.2)  |

'On-treatment without rescue medication' data. Subgroup data are presented as mean (standard deviation) unless otherwise indicated. BMI: body mass index; Dula: dulaglutide; HbA<sub>1c</sub>: glycated haemoglobin; n: number of subjects randomised and exposed to at least one dose of trial product as randomised (full analysis set); Sema: semaglutide.

**Supplementary Table 3. Baseline characteristics by diabetes duration subgroups**

|                              | All subjects   | ≤5 years       |                |                 |                | >5–10 years    |                |                |                | >10 years      |                |                |                |
|------------------------------|----------------|----------------|----------------|-----------------|----------------|----------------|----------------|----------------|----------------|----------------|----------------|----------------|----------------|
|                              |                | Sema 0.5 mg    | Dula 0.75 mg   | Sema 1.0 mg     | Dula 1.5 mg    | Sema 0.5 mg    | Dula 0.75 mg   | Sema 1.0 mg    | Dula 1.5 mg    | Sema 0.5 mg    | Dula 0.75 mg   | Sema 1.0 mg    | Dula 1.5 mg    |
| <b>n</b>                     | <b>1,199</b>   | <b>113</b>     | <b>128</b>     | <b>122</b>      | <b>114</b>     | <b>101</b>     | <b>94</b>      | <b>103</b>     | <b>92</b>      | <b>87</b>      | <b>77</b>      | <b>75</b>      | <b>93</b>      |
| Age, years                   | 56<br>(10.6)   | 52.3<br>(11.0) | 51.7<br>(10.1) | 51.1<br>(11.6)  | 51.8<br>(10.2) | 55.5<br>(9.8)  | 57.0<br>(8.5)  | 56.8<br>(7.9)  | 57.0<br>(10.3) | 62.3<br>(9.3)  | 58.9<br>(11.0) | 60.4<br>(9.4)  | 59.9<br>(9.7)  |
| Sex, n (%)                   |                |                |                |                 |                |                |                |                |                |                |                |                |                |
| Male                         | 662<br>(55.2)  | 62<br>(54.9)   | 71<br>(55.5)   | 61<br>(50.0)    | 53<br>(46.5)   | 55<br>(54.5)   | 46<br>(48.9)   | 58<br>(56.3)   | 64<br>(69.6)   | 52<br>(59.8)   | 43<br>(55.8)   | 43<br>(57.3)   | 54<br>(58.1)   |
| Female                       | 537<br>(44.8)  | 51<br>(45.1)   | 57<br>(44.5)   | 61<br>(50.0)    | 61<br>(53.5)   | 46<br>(45.5)   | 48<br>(51.1)   | 45<br>(43.7)   | 28<br>(30.4)   | 35<br>(40.2)   | 34<br>(44.2)   | 32<br>(42.7)   | 39<br>(41.9)   |
| Diabetes duration, years     | 7.4<br>(5.7)   | 2.6<br>(1.3)   | 2.5<br>(1.3)   | 2.5<br>(1.4)    | 2.6<br>(1.4)   | 7.0<br>(1.4)   | 7.1<br>(1.3)   | 7.3<br>(1.3)   | 7.0<br>(1.4)   | 15.3<br>(4.9)  | 14.5<br>(4.5)  | 14.9<br>(5.3)  | 14.5<br>(4.4)  |
| HbA <sub>1c</sub> , %        | 8.2<br>(0.9)   | 8.2<br>(1.0)   | 8.1<br>(0.9)   | 8.2<br>(0.9)    | 8.2<br>(0.9)   | 8.3<br>(1.0)   | 8.2<br>(0.9)   | 8.2<br>(1.0)   | 8.2<br>(0.8)   | 8.4<br>(0.9)   | 8.2<br>(0.9)   | 8.2<br>(0.9)   | 8.2<br>(0.9)   |
| HbA <sub>1c</sub> , mmol/mol | 66.4<br>(10.0) | 66.6<br>(10.8) | 65.3<br>(10.2) | 66.6<br>(9.6)   | 65.9<br>(10.1) | 67.5<br>(10.4) | 66.1<br>(9.8)  | 65.9<br>(10.5) | 66.4<br>(9.0)  | 68.6<br>(10.1) | 66.0<br>(9.8)  | 65.9<br>(10.3) | 66.2<br>(10.0) |
| Body weight, kg              | 95.2<br>(22.6) | 97.2<br>(27.6) | 96.8<br>(24.0) | 100.4<br>(23.6) | 92.0<br>(22.9) | 95.1<br>(21.8) | 96.6<br>(23.7) | 94.7<br>(18.1) | 95.1<br>(23.3) | 96.8<br>(23.0) | 92.4<br>(20.3) | 88.6<br>(17.7) | 93.5<br>(18.8) |
| BMI, kg/m <sup>2</sup>       | 33.5<br>(6.8)  | 34.0<br>(7.9)  | 34.3<br>(7.3)  | 35.1<br>(7.8)   | 33.0<br>(6.7)  | 33.3<br>(6.3)  | 33.9<br>(7.2)  | 33.3<br>(5.4)  | 33.2<br>(6.9)  | 33.7<br>(7.1)  | 32.3<br>(5.7)  | 31.6<br>(4.7)  | 33.1<br>(6.1)  |
| Race, n (%)                  |                |                |                |                 |                |                |                |                |                |                |                |                |                |
| Asian                        | 191<br>(15.9)  | 25<br>(22.1)   | 30<br>(23.4)   | 19<br>(15.6)    | 35<br>(30.7)   | 18<br>(17.8)   | 11<br>(11.7)   | 9<br>(8.7)     | 13<br>(14.1)   | 7<br>(8.0)     | 7<br>(9.1)     | 10<br>(13.3)   | 7<br>(7.5)     |
| Black/African American       | 70<br>(5.8)    | 2<br>(1.8)     | 8<br>(6.3)     | 5<br>(4.1)      | 6<br>(5.3)     | 6<br>(5.9)     | 4<br>(4.3)     | 7<br>(6.8)     | 1<br>(1.1)     | 9<br>(10.3)    | 5<br>(6.5)     | 6<br>(8.0)     | 11<br>(11.8)   |
| White                        | 928<br>(77.4)  | 86<br>(76.1)   | 89<br>(69.5)   | 97<br>(79.5)    | 72<br>(63.2)   | 76<br>(75.2)   | 79<br>(84.0)   | 87<br>(84.5)   | 77<br>(83.7)   | 71<br>(81.6)   | 64<br>(83.1)   | 59<br>(78.7)   | 71<br>(76.3)   |
| Other                        | 10<br>(0.8)    | 0              | 1<br>(0.8)     | 1<br>(0.8)      | 1<br>(0.9)     | 1<br>(1.0)     | 0              | 0              | 1<br>(1.1)     | 0              | 1<br>(1.3)     | 0              | 4<br>(4.3)     |

|                     |                 |               |               |               |              |              |              |              |              |              |              |              |              |
|---------------------|-----------------|---------------|---------------|---------------|--------------|--------------|--------------|--------------|--------------|--------------|--------------|--------------|--------------|
| Ethnic group, n (%) |                 |               |               |               |              |              |              |              |              |              |              |              |              |
| Hispanic/Latino     | 138<br>(11.5)   | 11<br>(9.7)   | 9<br>(7.0)    | 13<br>(10.7)  | 17<br>(14.9) | 5<br>(5.0)   | 7<br>(7.4)   | 12<br>(11.7) | 15<br>(16.3) | 13<br>(14.9) | 15<br>(19.5) | 10<br>(13.3) | 11<br>(11.8) |
| Non-Hispanic/Latino | 1,061<br>(88.5) | 102<br>(90.3) | 119<br>(93.0) | 109<br>(89.3) | 97<br>(85.1) | 96<br>(95.0) | 87<br>(92.6) | 91<br>(88.3) | 77<br>(83.7) | 74<br>(85.1) | 62<br>(80.5) | 65<br>(86.7) | 82<br>(88.2) |

'On-treatment without rescue medication' data. Subgroup data are presented as mean (standard deviation) unless otherwise indicated. BMI: body mass index; Dula: dulaglutide; HbA<sub>1c</sub>: glycated haemoglobin; n: number of subjects randomised and exposed to at least one dose of trial product as randomised (full analysis set); Sema: semaglutide.

For peer review only

**Supplementary Table 4. Baseline characteristics by baseline HbA<sub>1c</sub> subgroups**

|                              | All subjects   | ≤7.5% (≤58 mmol/mol) |                |                |                | >7.5–8.5% (>58–69 mmol/mol) |                |                |                | >8.5% (>69 mmol/mol) |                |                |                |
|------------------------------|----------------|----------------------|----------------|----------------|----------------|-----------------------------|----------------|----------------|----------------|----------------------|----------------|----------------|----------------|
|                              |                | Sema 0.5 mg          | Dula 0.75 mg   | Sema 1.0 mg    | Dula 1.5 mg    | Sema 0.5 mg                 | Dula 0.75 mg   | Sema 1.0 mg    | Dula 1.5 mg    | Sema 0.5 mg          | Dula 0.75 mg   | Sema 1.0 mg    | Dula 1.5 mg    |
| <b>n</b>                     | <b>1,199</b>   | <b>74</b>            | <b>94</b>      | <b>83</b>      | <b>84</b>      | <b>120</b>                  | <b>105</b>     | <b>124</b>     | <b>120</b>     | <b>107</b>           | <b>100</b>     | <b>93</b>      | <b>95</b>      |
| Age, years                   | 56<br>(10.6)   | 57.5<br>(12.2)       | 57.0<br>(10.4) | 57.7<br>(11.1) | 58.1<br>(10.2) | 57.3<br>(10.1)              | 53.3<br>(10.6) | 55.6<br>(9.7)  | 55.4<br>(10.5) | 54.3<br>(10.7)       | 53.5<br>(9.9)  | 53.1<br>(10.9) | 54.5<br>(10.9) |
| Sex, n (%)                   |                |                      |                |                |                |                             |                |                |                |                      |                |                |                |
| Male                         | 662<br>(55.2)  | 39<br>(52.7)         | 50<br>(53.2)   | 48<br>(57.8)   | 45<br>(53.6)   | 69<br>(57.5)                | 53<br>(50.5)   | 67<br>(54.0)   | 69<br>(57.5)   | 61<br>(57.0)         | 57<br>(57.0)   | 47<br>(50.5)   | 57<br>(60.0)   |
| Female                       | 537<br>(44.8)  | 35<br>(47.3)         | 44<br>(46.8)   | 35<br>(42.2)   | 39<br>(46.4)   | 51<br>(42.5)                | 52<br>(49.5)   | 57<br>(46.0)   | 51<br>(42.5)   | 46<br>(43.0)         | 43<br>(43.0)   | 46<br>(49.5)   | 38<br>(40.0)   |
| Diabetes duration, years     | 7.4<br>(5.7)   | 6.7<br>(4.6)         | 7.0<br>(6.2)   | 8.0<br>(5.9)   | 8.0<br>(6.5)   | 7.8<br>(6.1)                | 6.9<br>(4.8)   | 6.3<br>(5.0)   | 7.4<br>(5.5)   | 8.3<br>(6.5)         | 7.1<br>(5.5)   | 7.9<br>(6.1)   | 7.6<br>(5.0)   |
| HbA <sub>1c</sub> , %        | 8.2<br>(0.9)   | 7.3<br>(0.2)         | 7.2<br>(0.2)   | 7.2<br>(0.2)   | 7.2<br>(0.2)   | 8.0<br>(0.3)                | 8.0<br>(0.3)   | 8.0<br>(0.3)   | 8.0<br>(0.3)   | 9.4<br>(0.6)         | 9.3<br>(0.5)   | 9.4<br>(0.6)   | 9.3<br>(0.5)   |
| HbA <sub>1c</sub> , mmol/mol | 66.4<br>(10.0) | 55.8<br>(2.4)        | 55.4<br>(2.3)  | 55.6<br>(2.3)  | 55.7<br>(2.3)  | 64.0<br>(3.1)               | 63.5<br>(2.9)  | 63.9<br>(3.0)  | 64.1<br>(3.1)  | 79.4<br>(6.5)        | 77.7<br>(5.8)  | 78.7<br>(6.6)  | 78.0<br>(5.7)  |
| Body weight, kg              | 95.2<br>(22.6) | 99.1<br>(24.1)       | 96.9<br>(21.9) | 97.9<br>(24.3) | 93.0<br>(21.5) | 97.4<br>(22.9)              | 94.8<br>(23.0) | 94.8<br>(18.9) | 93.8<br>(21.5) | 93.4<br>(26.1)       | 95.3<br>(24.2) | 94.3<br>(20.3) | 93.3<br>(22.7) |
| BMI, kg/m <sup>2</sup>       | 33.5<br>(6.8)  | 34.2<br>(6.9)        | 34.0<br>(6.3)  | 34.6<br>(8.3)  | 33.4<br>(6.7)  | 34.1<br>(6.7)               | 33.4<br>(7.4)  | 33.1<br>(4.9)  | 33.1<br>(6.7)  | 32.8<br>(7.7)        | 33.5<br>(7.0)  | 33.4<br>(6.5)  | 32.8<br>(6.3)  |
| Race, n (%)                  |                |                      |                |                |                |                             |                |                |                |                      |                |                |                |
| Asian                        | 191<br>(15.9)  | 5<br>(6.8)           | 12<br>(12.8)   | 12<br>(14.5)   | 17<br>(20.2)   | 18<br>(15.0)                | 15<br>(14.3)   | 13<br>(10.5)   | 23<br>(19.2)   | 27<br>(25.2)         | 21<br>(21.0)   | 13<br>(14.0)   | 15<br>(15.8)   |
| Black/African American       | 70<br>(5.8)    | 8<br>(10.8)          | 6<br>(6.4)     | 8<br>(9.6)     | 6<br>(7.1)     | 5<br>(4.2)                  | 6<br>(5.7)     | 6<br>(4.8)     | 9<br>(7.5)     | 4<br>(3.7)           | 5<br>(5.0)     | 4<br>(4.3)     | 3<br>(3.2)     |
| White                        | 928<br>(77.4)  | 61<br>(82.4)         | 76<br>(80.9)   | 63<br>(75.9)   | 60<br>(71.4)   | 96<br>(80.0)                | 84<br>(80.0)   | 105<br>(84.7)  | 87<br>(72.5)   | 76<br>(71.0)         | 72<br>(72.0)   | 75<br>(80.6)   | 73<br>(76.8)   |
| Other                        | 10<br>(0.8)    | 0                    | 0              | 0              | 1<br>(1.2)     | 1<br>(0.8)                  | 0              | 0              | 1<br>(0.8)     | 0                    | 2<br>(2.0)     | 1<br>(1.1)     | 4<br>(4.2)     |

|                     |                 |              |              |              |              |               |              |               |               |              |              |              |              |
|---------------------|-----------------|--------------|--------------|--------------|--------------|---------------|--------------|---------------|---------------|--------------|--------------|--------------|--------------|
| Ethnic group, n (%) |                 |              |              |              |              |               |              |               |               |              |              |              |              |
| Hispanic/Latino     | 138<br>(11.5)   | 6<br>(8.1)   | 8<br>(8.5)   | 8<br>(9.6)   | 7<br>(8.3)   | 8<br>(6.7)    | 8<br>(7.6)   | 15<br>(12.1)  | 15<br>(12.5)  | 15<br>(14.0) | 15<br>(15.0) | 12<br>(12.9) | 21<br>(22.1) |
| Non-Hispanic/Latino | 1,061<br>(88.5) | 68<br>(91.9) | 86<br>(91.5) | 75<br>(90.4) | 77<br>(91.7) | 112<br>(93.3) | 97<br>(92.4) | 109<br>(87.9) | 105<br>(87.5) | 92<br>(86.0) | 85<br>(85.0) | 81<br>(87.1) | 74<br>(77.9) |

'On-treatment without rescue medication' data. Subgroup data are presented as mean (standard deviation) unless otherwise indicated. BMI: body mass index; Dula: dulaglutide; n: number of subjects randomised and exposed to at least one dose of trial product as randomised (full analysis set); Sema: semaglutide.

For peer review only

1  
2  
3  
4  
5  
6  
7  
8  
9  
10  
11  
12  
13  
14  
15  
16  
17  
18  
19  
20  
21  
22  
23  
24  
25  
26  
27  
28  
29  
30  
31  
32  
33  
34  
35  
36  
37  
38  
39  
40  
41  
42  
43  
44  
45  
46  
47

**Supplementary Table 5. Subject demographics and baseline characteristics by baseline BMI**

|                              |                | <30 kg/m <sup>2</sup> |                 |                |                | 30–<35 kg/m <sup>2</sup> |                 |                |                | ≥35 kg/m <sup>2</sup> |                 |                 |                 |
|------------------------------|----------------|-----------------------|-----------------|----------------|----------------|--------------------------|-----------------|----------------|----------------|-----------------------|-----------------|-----------------|-----------------|
|                              | All subjects   | Sema<br>0.5 mg        | Dula<br>0.75 mg | Sema<br>1.0 mg | Dula<br>1.5 mg | Sema<br>0.5 mg           | Dula<br>0.75 mg | Sema<br>1.0 mg | Dula<br>1.5 mg | Sema<br>0.5 mg        | Dula<br>0.75 mg | Sema<br>1.0 mg  | Dula<br>1.5 mg  |
| <b>n</b>                     | <b>1,199</b>   | <b>99</b>             | <b>100</b>      | <b>91</b>      | <b>109</b>     | <b>90</b>                | <b>86</b>       | <b>105</b>     | <b>81</b>      | <b>112</b>            | <b>113</b>      | <b>104</b>      | <b>108</b>      |
| Age, years                   | 56<br>(10.6)   | 57.4<br>(11.2)        | 56.0<br>(11.4)  | 57.5<br>(10.4) | 56.9<br>(10.5) | 58.7<br>(10.1)           | 55.3<br>(9.6)   | 54.4<br>(11.8) | 57.9<br>(10.7) | 53.3<br>(10.7)        | 54.5<br>(10.0)  | 54.6<br>(9.3)   | 53.5<br>(10.4)  |
| Sex, n (%)                   |                |                       |                 |                |                |                          |                 |                |                |                       |                 |                 |                 |
| Male                         | 662<br>(55.2)  | 57<br>(57.6)          | 60<br>(60.0)    | 56<br>(61.5)   | 71<br>(65.1)   | 53<br>(58.9)             | 44<br>(51.2)    | 62<br>(59.0)   | 47<br>(58.0)   | 59<br>(52.7)          | 56<br>(49.6)    | 44<br>(42.3)    | 52<br>(48.1)    |
| Female                       | 537<br>(44.8)  | 42<br>(42.4)          | 40<br>(40.0)    | 35<br>(38.5)   | 38<br>(34.9)   | 37<br>(41.1)             | 42<br>(48.8)    | 43<br>(41.0)   | 34<br>(42.0)   | 53<br>(47.3)          | 57<br>(50.4)    | 60<br>(57.7)    | 56<br>(51.9)    |
| Diabetes duration, years     | 7.4<br>(5.7)   | 8.0<br>(6.9)          | 8.0<br>(6.3)    | 9.0<br>(6.9)   | 7.3<br>(5.8)   | 7.5<br>(5.1)             | 6.2<br>(4.6)    | 7.0<br>(4.9)   | 7.9<br>(5.7)   | 7.7<br>(5.6)          | 6.7<br>(5.3)    | 6.0<br>(4.8)    | 7.8<br>(5.5)    |
| HbA <sub>1c</sub> , %        | 8.2<br>(0.9)   | 8.4<br>(1.0)          | 8.2<br>(0.9)    | 8.3<br>(1.0)   | 8.1<br>(0.9)   | 8.2<br>(1.0)             | 8.2<br>(1.0)    | 8.1<br>(0.8)   | 8.2<br>(0.8)   | 8.3<br>(0.9)          | 8.1<br>(0.9)    | 8.2<br>(0.9)    | 8.3<br>(0.9)    |
| HbA <sub>1c</sub> , mmol/mol | 66.4<br>(10.0) | 68.6<br>(10.9)        | 65.7<br>(9.6)   | 66.9<br>(10.8) | 65.5<br>(9.8)  | 66.2<br>(10.6)           | 66.4<br>(10.8)  | 65.5<br>(9.1)  | 65.9<br>(8.7)  | 67.4<br>(9.9)         | 65.1<br>(9.6)   | 66.3<br>(10.3)  | 66.9<br>(10.3)  |
| Body weight, kg              | 95.2<br>(22.6) | 73.8<br>(12.4)        | 75.1<br>(12.4)  | 78.4<br>(13.0) | 74.7<br>(12.6) | 94.1<br>(12.6)           | 91.8<br>(11.6)  | 92.8<br>(12.3) | 93.5<br>(11.3) | 118.2<br>(20.1)       | 116.8<br>(18.2) | 113.2<br>(19.7) | 112.3<br>(18.5) |
| BMI, kg/m <sup>2</sup>       | 33.5<br>(6.8)  | 26.5<br>(2.5)         | 26.8<br>(2.3)   | 27.2<br>(2.2)  | 26.7<br>(2.5)  | 32.6<br>(1.4)            | 32.3<br>(1.4)   | 32.4<br>(1.5)  | 32.7<br>(1.5)  | 40.9<br>(5.5)         | 40.7<br>(5.1)   | 40.5<br>(5.5)   | 39.8<br>(4.9)   |
| Race, n (%)                  |                |                       |                 |                |                |                          |                 |                |                |                       |                 |                 |                 |
| Asian                        | 191<br>(15.9)  | 37<br>(37.4)          | 31<br>(31.0)    | 23<br>(25.3)   | 41<br>(37.6)   | 9<br>(10.0)              | 14<br>(16.3)    | 13<br>(12.4)   | 7<br>(8.6)     | 4<br>(3.6)            | 3<br>(2.7)      | 2<br>(1.9)      | 6<br>(5.6)      |
| Black/African American       | 70<br>(5.8)    | 2<br>(2.0)            | 7<br>(7.0)      | 9<br>(9.9)     | 4<br>(3.7)     | 5<br>(5.6)               | 3<br>(3.5)      | 5<br>(4.8)     | 6<br>(7.4)     | 10<br>(8.9)           | 7<br>(6.2)      | 4<br>(3.8)      | 8<br>(7.4)      |
| White                        | 928<br>(77.4)  | 60<br>(60.6)          | 62<br>(62.0)    | 59<br>(64.8)   | 63<br>(57.8)   | 76<br>(84.4)             | 69<br>(80.2)    | 87<br>(82.9)   | 67<br>(82.7)   | 97<br>(86.6)          | 101<br>(89.4)   | 97<br>(93.3)    | 90<br>(83.3)    |
| Other                        | 10<br>(0.8)    | 0                     | 0               | 0              | 1<br>(0.9)     | 0                        | 0               | 0              | 1<br>(1.2)     | 1<br>(0.9)            | 2<br>(1.8)      | 1<br>(1.0)      | 4<br>(3.7)      |

1  
2  
3  
4  
5  
6  
7  
8  
9  
10  
11  
12  
13  
14  
15  
16  
17  
18  
19  
20  
21  
22  
23  
24  
25  
26  
27  
28  
29  
30  
31  
32  
33  
34  
35  
36  
37  
38  
39  
40  
41  
42  
43  
44  
45  
46  
47

|                     |                 |              |              |              |              |              |              |              |              |               |               |              |              |
|---------------------|-----------------|--------------|--------------|--------------|--------------|--------------|--------------|--------------|--------------|---------------|---------------|--------------|--------------|
| Ethnic group, n (%) |                 |              |              |              |              |              |              |              |              |               |               |              |              |
| Hispanic/Latino     | 138<br>(11.5)   | 8<br>(8.1)   | 15<br>(15.0) | 13<br>(14.3) | 18<br>(16.5) | 10<br>(11.1) | 7<br>(8.1)   | 13<br>(12.4) | 11<br>(13.6) | 11<br>(9.8)   | 9<br>(8.0)    | 9<br>(8.7)   | 14<br>(13.0) |
| Non-Hispanic/Latino | 1,061<br>(88.5) | 91<br>(91.9) | 85<br>(85.0) | 78<br>(85.7) | 91<br>(83.5) | 80<br>(88.9) | 79<br>(91.9) | 92<br>(87.6) | 70<br>(86.4) | 101<br>(90.2) | 104<br>(92.0) | 95<br>(91.3) | 94<br>(87.0) |

'On-treatment without rescue medication' data. Subgroup data are presented as mean (standard deviation) unless otherwise indicated. BMI: body mass index; Dula: dulaglutide; HbA<sub>1c</sub>: glycated haemoglobin; n: number of subjects randomised and exposed to at least one dose of trial product as randomised (full analysis set); Sema: semaglutide.

For peer review only



**Supplementary Table 6. Baseline characteristics of subjects with BMI <25 kg/m<sup>2</sup> at baseline**

|                              | All subjects | Sema 0.5 mg | Dula 0.75 mg | Sema 1.0 mg | Dula 1.5 mg |
|------------------------------|--------------|-------------|--------------|-------------|-------------|
| <b>n</b>                     | <b>1,199</b> | <b>24</b>   | <b>19</b>    | <b>16</b>   | <b>28</b>   |
| Age, years                   | 56 (10.6)    | 56.9 (10.0) | 51.2 (12.1)  | 61.8 (11.5) | 56.8 (11.8) |
| Sex, n (%)                   |              |             |              |             |             |
| Male                         | 662 (55.2)   | 15 (62.5)   | 13 (68.4)    | 8 (50.0)    | 18 (64.3)   |
| Female                       | 537 (44.8)   | 9 (37.5)    | 6 (31.6)     | 8 (50.0)    | 10 (35.7)   |
| Diabetes duration, years     | 7.4 (5.7)    | 6.8 (6.4)   | 7.8 (6.6)    | 12.2 (9.2)  | 7.3 (5.7)   |
| HbA <sub>1c</sub> , %        | 8.2 (0.9)    | 8.8 (1.1)   | 8.5 (0.8)    | 8.4 (1.1)   | 8.3 (1.1)   |
| HbA <sub>1c</sub> , mmol/mol | 66.4 (10.0)  | 72.4 (11.5) | 69.6 (8.6)   | 68.2 (12.1) | 67.6 (11.5) |
| Body weight, kg              | 95.2 (22.6)  | 62.9 (8.2)  | 61.8 (9.7)   | 64.5 (8.4)  | 62.4 (7.8)  |
| BMI, kg/m <sup>2</sup>       | 33.5 (6.8)   | 23.0 (1.6)  | 23.1 (1.6)   | 23.4 (1.6)  | 23.1 (1.2)  |
| Race, n (%)                  |              |             |              |             |             |
| Asian                        | 191 (15.9)   | 17 (70.8)   | 9 (47.4)     | 7 (43.8)    | 16 (57.1)   |
| Black/African American       | 70 (5.8)     | 0           | 0            | 0           | 1 (3.6)     |
| White                        | 928 (77.4)   | 7 (29.2)    | 10 (52.6)    | 9 (56.3)    | 11 (39.3)   |
| Other                        | 10 (0.8)     | 0           | 0            | 0           | 0           |
| Ethnic group, n (%)          |              |             |              |             |             |
| Hispanic/Latino              | 138 (11.5)   | 2 (8.3)     | 5 (26.3)     | 3 (18.8)    | 3 (10.7)    |
| Non-Hispanic/Latino          | 1,061 (88.5) | 22 (91.7)   | 14 (73.7)    | 13 (81.3)   | 25 (89.3)   |

'On-treatment without rescue medication' data. Subgroup data are presented as mean (standard deviation) unless otherwise indicated. BMI: body mass index; Dula: dulaglutide; HbA<sub>1c</sub>: glycated haemoglobin; n: number of subjects randomised and exposed to at least one dose of trial product as randomised (full analysis set); Sema: semaglutide.

1  
2  
3  
4  
5  
6  
7  
8  
9  
10  
11  
12  
13  
14  
15  
16  
17  
18  
19  
20  
21  
22  
23  
24  
25  
26  
27  
28  
29  
30  
31  
32  
33  
34  
35  
36  
37  
38  
39  
40  
41  
42  
43  
44  
45  
46  
47  
48  
49  
50  
51  
52  
53  
54  
55  
56  
57  
58  
59  
60

**SUPPLEMENTARY SECTION III: SUBJECT DISPOSITION**

For peer review only

**Supplementary Figure 1. Subject disposition in SUSTAIN 7.**

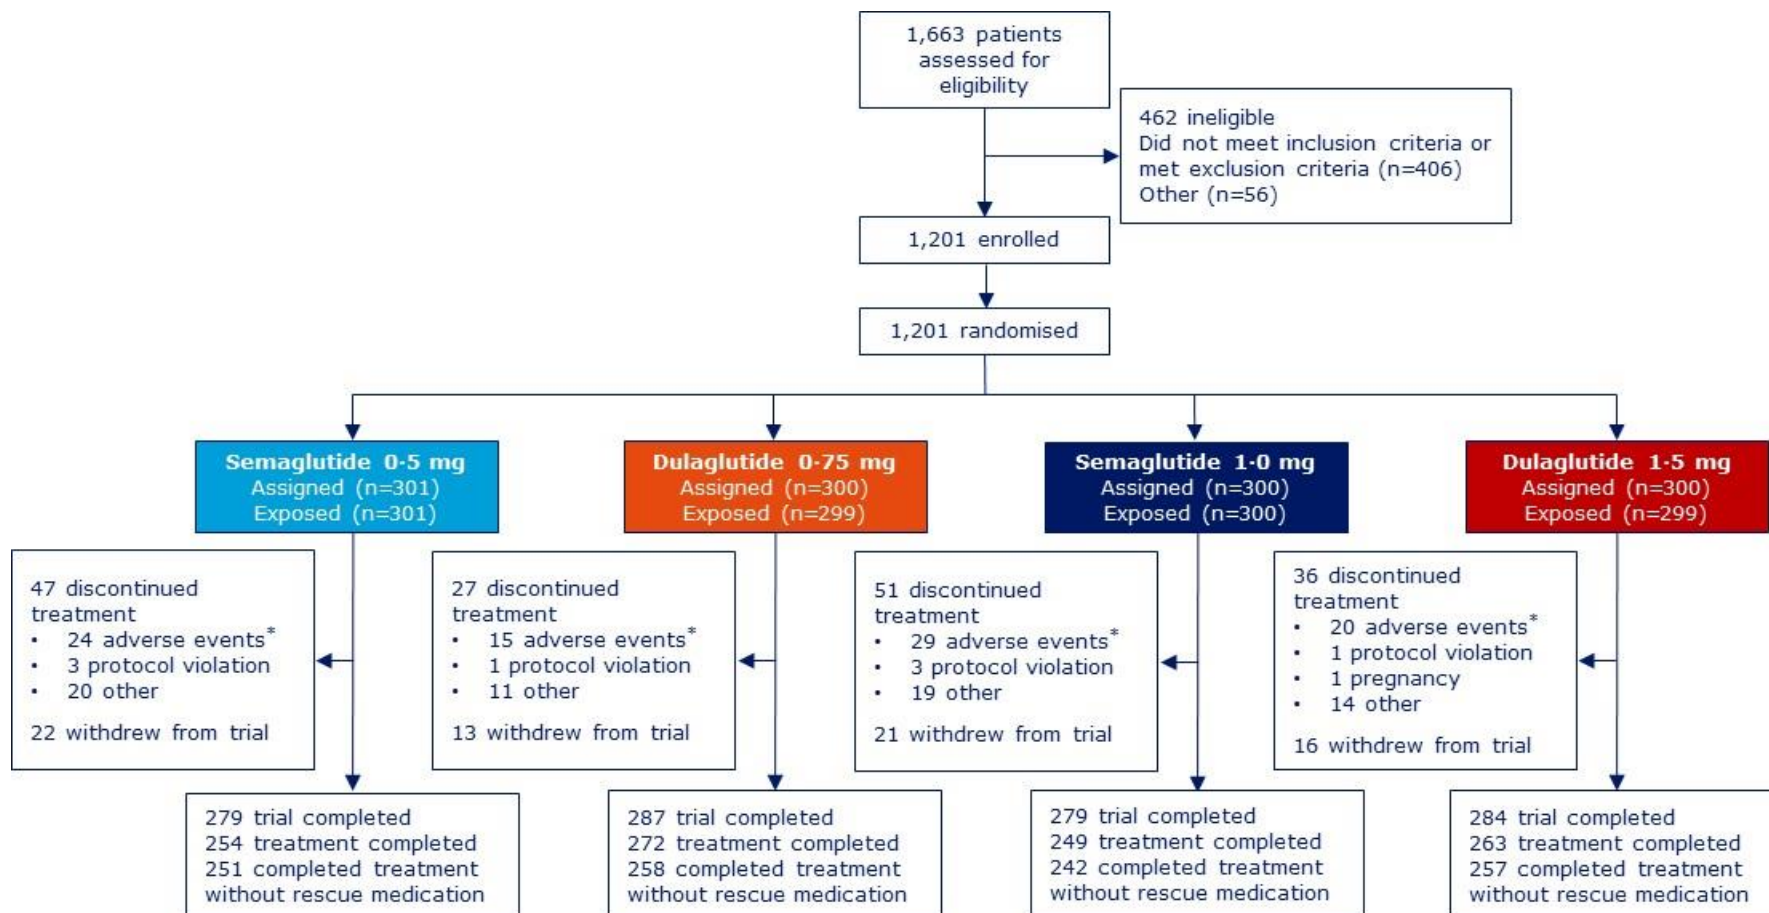

\*Reflects primary reason for treatment discontinuation, as judged by the investigator. 'Completed trial' refers to those patients who attended the follow-up visit. 'Completed treatment' refers to those patients who did not discontinue treatment prematurely (with or without the addition of rescue medication).

1  
2  
3  
4  
5  
6  
7  
8  
9  
10  
11  
12  
13  
14  
15  
16  
17  
18  
19  
20  
21  
22  
23  
24  
25  
26  
27  
28  
29  
30  
31  
32  
33  
34  
35  
36  
37  
38  
39  
40  
41  
42  
43  
44  
45  
46  
47  
48  
49  
50  
51  
52  
53  
54  
55  
56  
57  
58  
59  
60

**SUPPLEMENTARY SECTION IV: GLYCAEMIC TARGETS & WEIGHT-LOSS RESPONSES**

For peer review only

**Supplementary Figure 2. Change from baseline in HbA<sub>1c</sub> (A, C, E, G, I) and body weight (B, D, F, H, J) at week 40 by age (A, B), sex (C, D), diabetes duration (E, F), HbA<sub>1c</sub> (G, H) and BMI (I, J) at baseline.**

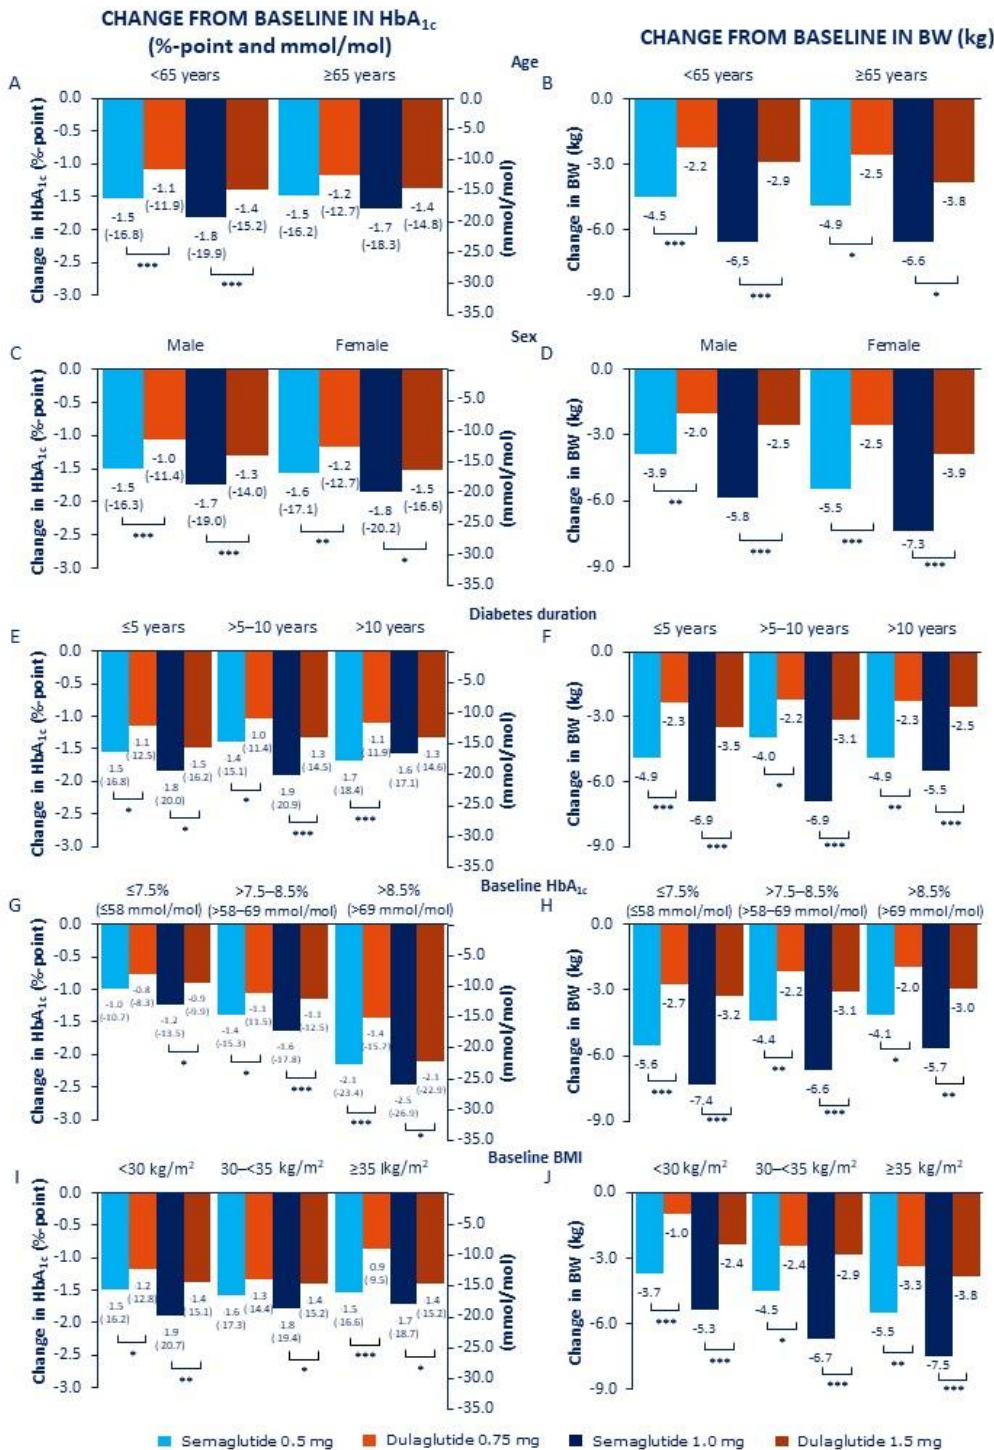

1  
2  
3 \*p<0.05, \*\*p<0.001, \*\*\*p<0.0001. Values are estimated means from ANCOVAs controlled for baseline HbA<sub>1c</sub>  
4 (A, C, E, G, I) or BW (B, D, F, H, I) with multiple imputations using data from all randomised subjects exposed to  
5 at least one dose of trial product and did not discontinue treatment or receive any non-investigational  
6 antihyperglycaemic treatment (full analysis set) obtained while on treatment and prior to onset of rescue  
7 medication. P-values are based on ETDs; statistical analyses were not performed for change from baseline.  
8 ANCOVA: analysis of covariance; BMI: body mass index; BW: body weight; ETD: estimated treatment difference;  
9 HbA<sub>1c</sub>: glycated haemoglobin.  
10  
11  
12  
13  
14  
15  
16  
17  
18  
19  
20  
21  
22  
23  
24  
25  
26  
27  
28  
29  
30  
31  
32  
33  
34  
35  
36  
37  
38  
39  
40  
41  
42  
43  
44  
45  
46  
47  
48  
49  
50  
51  
52  
53  
54  
55  
56  
57  
58  
59  
60



**Supplementary Figure 3. Odds ratios for the proportion of subjects achieving HbA<sub>1c</sub> <7.0% (53 mmol/mol; A) and HbA<sub>1c</sub> ≤6.5% (48 mmol/mol; B) at 40 weeks by age, sex, diabetes duration, HbA<sub>1c</sub> and BMI at baseline**

(A)

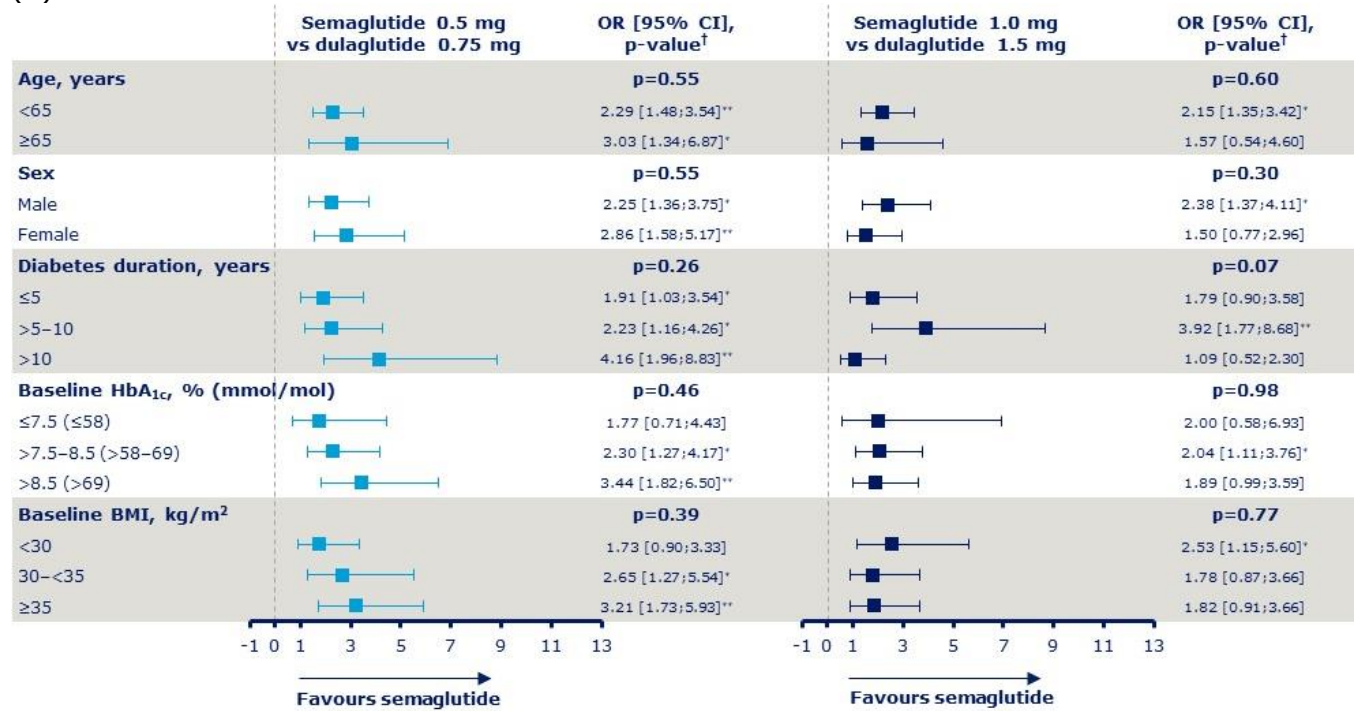

(B)

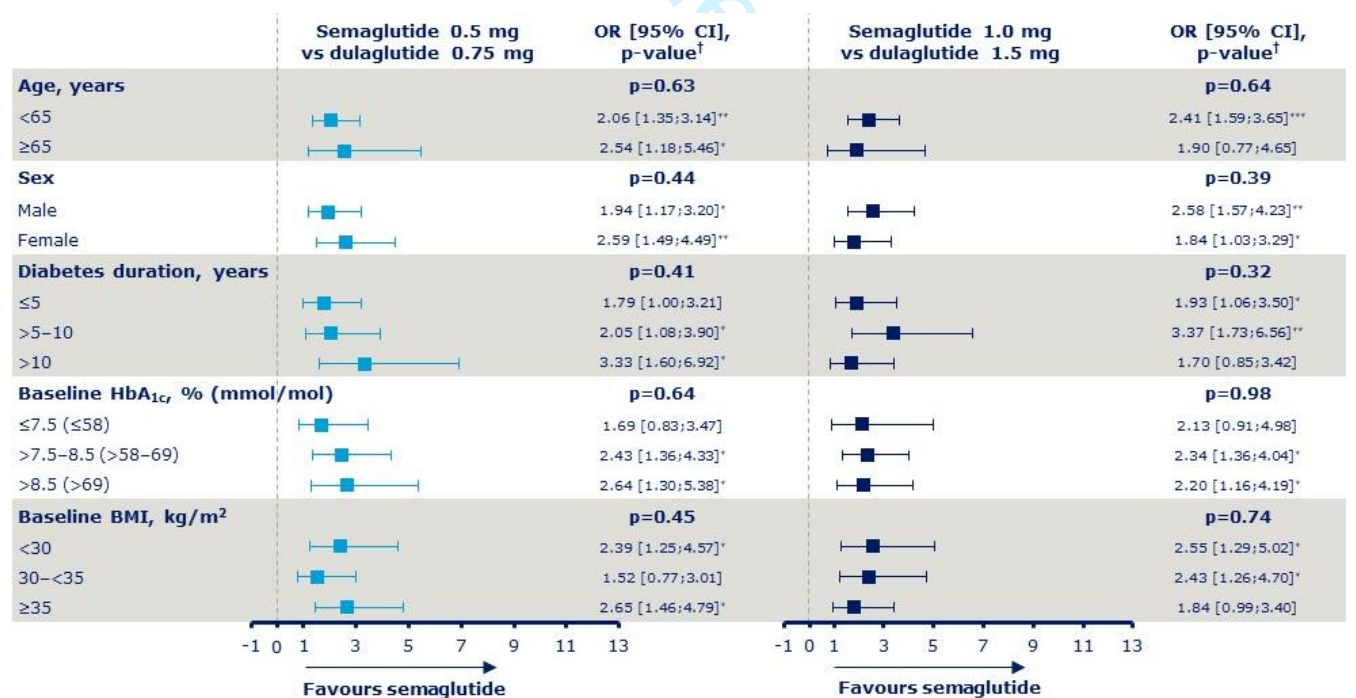

\*p<0.05, \*\*p<0.001, \*\*\*p<0.0001; †p-values represent the test for treatment by subgroup interaction. Values are ORs [95% CIs] from ANCOVAs with multiple imputations using 'on-treatment without rescue medication' data

1  
2  
3 from all randomised subjects exposed to at least one dose of trial product as randomised (full analysis set)  
4 obtained while on treatment and prior to onset of rescue medication. ANCOVA controlled for baseline HbA<sub>1c</sub> and  
5 interaction between randomised treatment and subgroup. ANCOVA: analysis of covariance; BMI: body mass index;  
6 CI: confidence interval; HbA<sub>1c</sub>: glycated haemoglobin; OR: odds ratio.  
7  
8  
9  
10  
11  
12  
13  
14  
15  
16  
17  
18  
19  
20  
21  
22  
23  
24  
25  
26  
27  
28  
29  
30  
31  
32  
33  
34  
35  
36  
37  
38  
39  
40  
41  
42  
43  
44  
45  
46  
47  
48  
49  
50  
51  
52  
53  
54  
55  
56  
57  
58  
59  
60

For peer review only



**Supplementary Figure 4. Odds ratios for the proportion of subjects achieving weight loss  $\geq 5\%$  (A) and weight loss  $\geq 10\%$  (B) at 40 weeks by age, sex, diabetes duration, HbA<sub>1c</sub> and BMI at baseline**

(A)

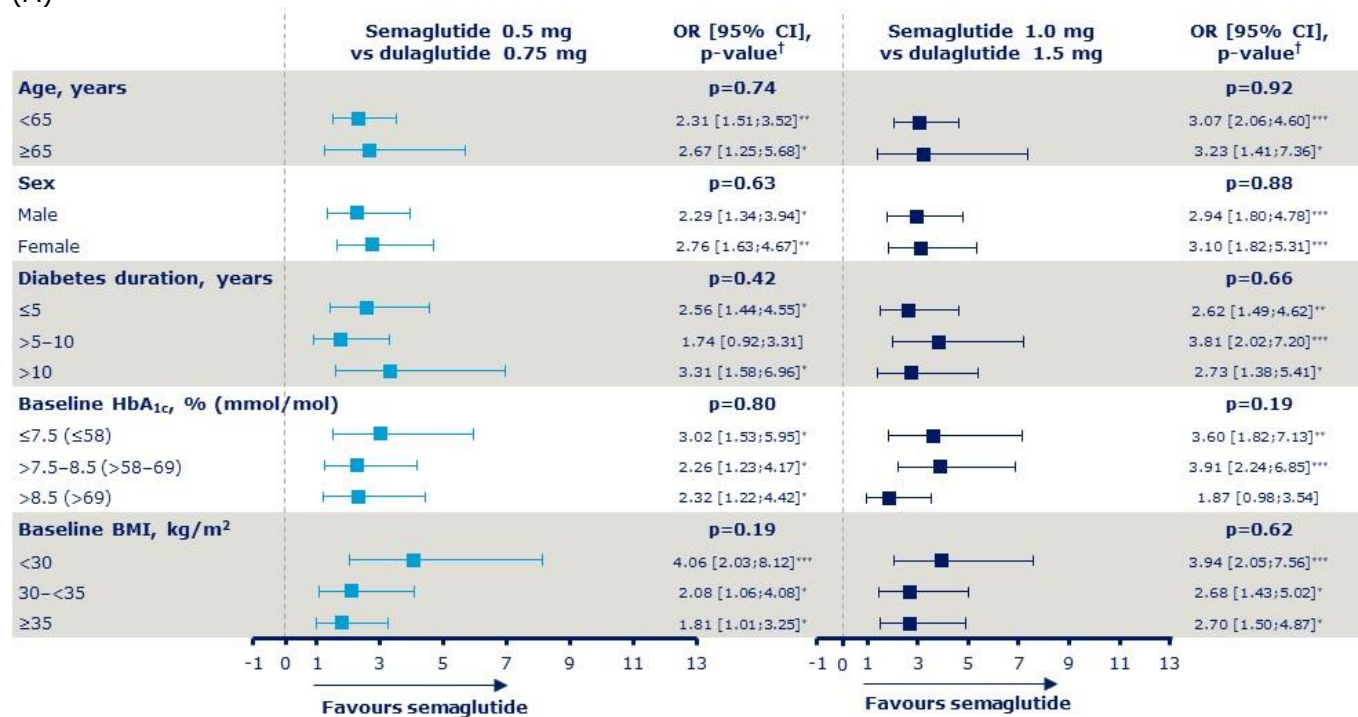

(B)

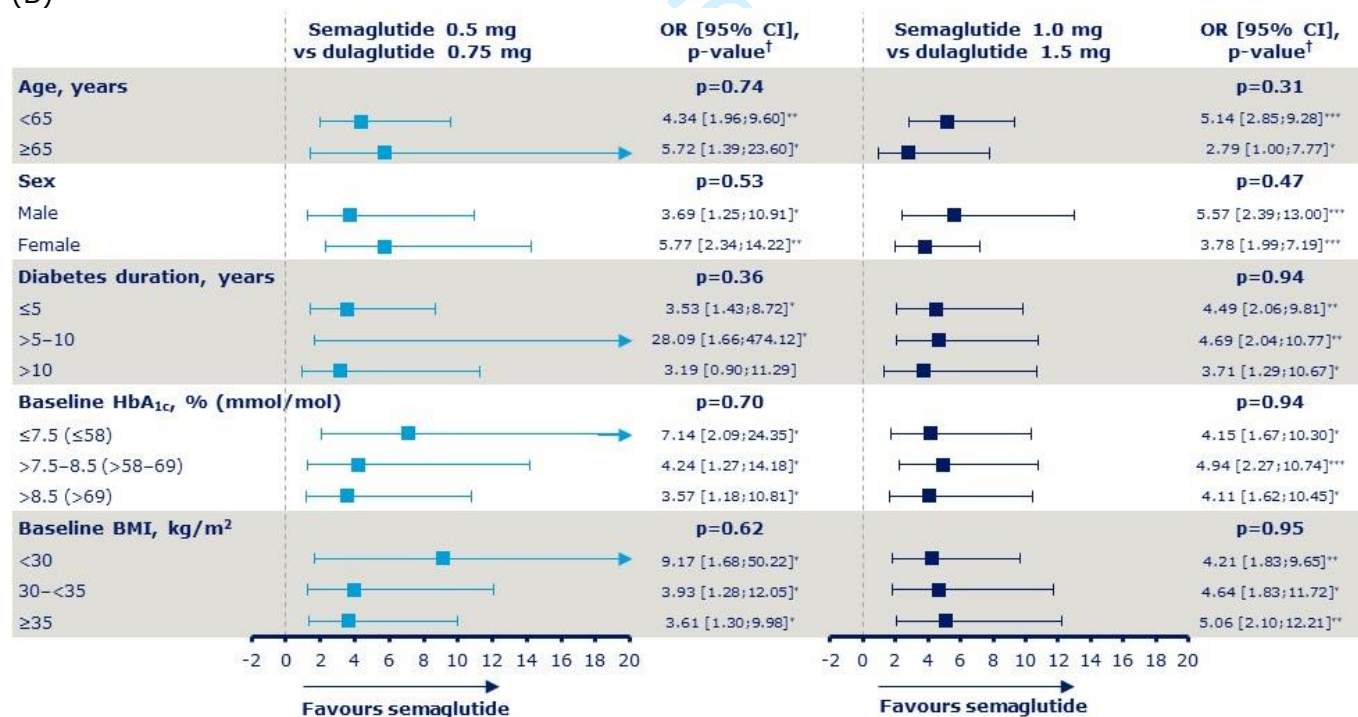

1  
2  
3 \*p<0.05, \*\*p<0.001, \*\*\*p<0.0001; †p-values represent the test for treatment by subgroup interaction. Values  
4 are ORs [95% CIs] from ANCOVA analyses with multiple imputations using 'on-treatment without rescue  
5 medication' data from all randomised subjects exposed to at least one dose of trial product as randomised (full  
6 analysis set) obtained while on treatment and prior to onset of rescue medication. ANCOVA controlled for baseline  
7 HbA<sub>1c</sub> and interaction between randomised treatment and subgroup. ANCOVA: analysis of covariance; BMI: body  
8 mass index; CI: confidence interval; HbA<sub>1c</sub>: glycated haemoglobin; OR: odds ratio.  
9  
10  
11  
12  
13  
14  
15  
16  
17  
18  
19  
20  
21  
22  
23  
24  
25  
26  
27  
28  
29  
30  
31  
32  
33  
34  
35  
36  
37  
38  
39  
40  
41  
42  
43  
44  
45  
46  
47  
48  
49  
50  
51  
52  
53  
54  
55  
56  
57  
58  
59  
60

**Supplementary Figure 5: Change in body weight (%) from baseline to week 40 by baseline BMI category**

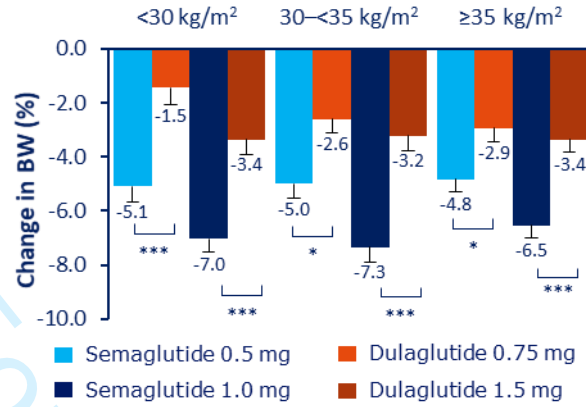

\*p<0.05, \*\*\*p<0.0001. Values are estimated means from ANCOVAs with multiple imputations using 'on-treatment without rescue medication' data from all randomised subjects exposed to at least one dose of trial product as randomised (full analysis set) obtained while on treatment and prior to onset of rescue medication. ANCOVA: analysis of covariance; BMI: body mass index; BW: body weight.

1  
2  
3  
4  
5  
6  
7  
8  
9  
10  
11  
12  
13  
14  
15  
16  
17  
18  
19  
20  
21  
22  
23  
24  
25  
26  
27  
28  
29  
30  
31  
32  
33  
34  
35  
36  
37  
38  
39  
40  
41  
42  
43  
44  
45  
46  
47  
48  
49  
50  
51  
52  
53  
54  
55  
56  
57  
58  
59  
60

**SUPPLEMENTARY SECTION V: ADVERSE EVENTS**

For peer review only

**Supplementary Table 7. Adverse events by sex subgroups**

| n (%)                                                               | All subjects  | Male          |              |               |               | Female       |              |              |              |
|---------------------------------------------------------------------|---------------|---------------|--------------|---------------|---------------|--------------|--------------|--------------|--------------|
|                                                                     |               | Sema 0.5 mg   | Dula 0.75 mg | Sema 1.0 mg   | Dula 1.5 mg   | Sema 0.5 mg  | Dula 0.75 mg | Sema 1.0 mg  | Dula 1.5 mg  |
|                                                                     | <b>1,199</b>  | <b>169</b>    | <b>160</b>   | <b>162</b>    | <b>171</b>    | <b>132</b>   | <b>139</b>   | <b>138</b>   | <b>128</b>   |
| AEs                                                                 | 818<br>(68.2) | 111<br>(65.7) | 97<br>(60.6) | 113<br>(69.8) | 129<br>(75.4) | 93<br>(70.5) | 89<br>(64.0) | 94<br>(68.1) | 92<br>(71.9) |
| Serious AEs                                                         | 86<br>(7.2)   | 11<br>(6.5)   | 15<br>(9.4)  | 10<br>(6.2)   | 12<br>(7.0)   | 6<br>(4.5)   | 9<br>(6.5)   | 13<br>(9.4)  | 10<br>(7.8)  |
| AEs leading to premature treatment discontinuation                  | 87<br>(7.3)   | 13<br>(7.7)   | 8<br>(5.0)   | 15<br>(9.3)   | 12<br>(7.0)   | 11<br>(8.3)  | 6<br>(4.3)   | 14<br>(10.1) | 8<br>(6.3)   |
| Gastrointestinal AEs leading to premature treatment discontinuation | 54<br>(4.5)   | 8<br>(4.7)    | 1<br>(0.6)   | 9<br>(5.6)    | 8<br>(4.7)    | 8<br>(6.1)   | 5<br>(3.6)   | 9<br>(6.5)   | 6<br>(4.8)   |
| Gastrointestinal AEs                                                | 505<br>(42.1) | 67<br>(39.6)  | 47<br>(29.4) | 67<br>(41.4)  | 81<br>(47.4)  | 62<br>(47.0) | 53<br>(38.1) | 66<br>(47.8) | 62<br>(48.4) |
| Vomiting                                                            | 103<br>(8.6)  | 13<br>(7.7)   | 5<br>(3.1)   | 11<br>(6.8)   | 16<br>(9.4)   | 18<br>(13.6) | 7<br>(5.0)   | 20<br>(14.5) | 13<br>(10.2) |
| Nausea                                                              | 230<br>(19.2) | 29<br>(17.2)  | 13<br>(8.1)  | 25<br>(15.4)  | 33<br>(19.3)  | 39<br>(29.5) | 26<br>(18.7) | 38<br>(27.5) | 27<br>(21.1) |
| Diarrhoea                                                           | 160<br>(13.3) | 21<br>(12.4)  | 10<br>(6.3)  | 19<br>(11.7)  | 33<br>(19.3)  | 22<br>(16.7) | 13<br>(9.4)  | 22<br>(15.9) | 20<br>(15.6) |
| Hypoglycaemia (severe/BG-confirmed)                                 | 15<br>(1.3)   | 1<br>(0.6)    | 3<br>(1.9)   | 3<br>(1.9)    | 3<br>(1.8)    | 1<br>(0.8)   | 0            | 2<br>(1.4)   | 2<br>(1.6)   |

Data are presented as number and proportion in percent of subjects with adverse events. Hypoglycaemia was defined as an episode that was severe (according to the American Diabetes Association classification) or BG-confirmed (plasma glucose value <56 mg/dL [3.1 mmol/L]) with symptoms consistent with hypoglycaemia. AE: adverse event; BG: blood glucose; Dula: dulaglutide; n: number of subjects randomised and exposed to at least one dose of trial product as treated (safety analysis set); Sema: semaglutide.

**Supplementary Table 8. Adverse events by diabetes duration subgroups**

| n (%)                                                               | All subjects  | ≤5 years     |              |              |              | >5–10 years  |              |              |              | >10 years    |              |              |              |
|---------------------------------------------------------------------|---------------|--------------|--------------|--------------|--------------|--------------|--------------|--------------|--------------|--------------|--------------|--------------|--------------|
|                                                                     |               | Sema 0.5 mg  | Dula 0.75 mg | Sema 1.0 mg  | Dula 1.5 mg  | Sema 0.5 mg  | Dula 0.75 mg | Sema 1.0 mg  | Dula 1.5 mg  | Sema 0.5 mg  | Dula 0.75 mg | Sema 1.0 mg  | Dula 1.5 mg  |
|                                                                     | <b>1,199</b>  | <b>113</b>   | <b>128</b>   | <b>122</b>   | <b>114</b>   | <b>101</b>   | <b>94</b>    | <b>103</b>   | <b>92</b>    | <b>87</b>    | <b>77</b>    | <b>75</b>    | <b>93</b>    |
| AEs                                                                 | 818<br>(68.2) | 76<br>(67.3) | 81<br>(63.3) | 79<br>(64.8) | 76<br>(66.7) | 66<br>(65.3) | 52<br>(55.3) | 74<br>(71.8) | 73<br>(79.3) | 62<br>(71.3) | 53<br>(68.8) | 54<br>(72.0) | 72<br>(77.4) |
| Serious AEs                                                         | 86<br>(7.2)   | 5<br>(4.4)   | 9<br>(7.0)   | 10<br>(8.2)  | 9<br>(7.9)   | 4<br>(4.0)   | 6<br>(6.4)   | 7<br>(6.8)   | 6<br>(6.5)   | 8<br>(9.2)   | 9<br>(11.7)  | 6<br>(8.0)   | 7<br>(7.5)   |
| AEs leading to premature treatment discontinuation                  | 87<br>(7.3)   | 9<br>(8.0)   | 3<br>(2.3)   | 9<br>(7.4)   | 5<br>(4.4)   | 10<br>(9.9)  | 5<br>(5.3)   | 9<br>(8.7)   | 8<br>(8.7)   | 5<br>(5.7)   | 6<br>(7.8)   | 11<br>(14.7) | 7<br>(7.5)   |
| Gastrointestinal AEs leading to premature treatment discontinuation | 54<br>(4.5)   | 7<br>(6.2)   | 1<br>(0.8)   | 6<br>(4.9)   | 3<br>(2.6)   | 6<br>(5.9)   | 1<br>(1.1)   | 5<br>(4.9)   | 5<br>(5.4)   | 3<br>(3.4)   | 4<br>(5.2)   | 7<br>(9.3)   | 6<br>(6.5)   |
| Gastrointestinal AEs                                                | 505<br>(42.1) | 52<br>(46.0) | 44<br>(34.4) | 57<br>(46.7) | 52<br>(45.6) | 44<br>(43.6) | 26<br>(27.7) | 42<br>(40.8) | 48<br>(52.2) | 33<br>(37.9) | 30<br>(39.0) | 34<br>(45.3) | 43<br>(46.2) |
| Vomiting                                                            | 103<br>(8.6)  | 14<br>(12.4) | 5<br>(3.9)   | 18<br>(14.8) | 8<br>(7.0)   | 10<br>(9.9)  | 4<br>(4.3)   | 6<br>(5.8)   | 9<br>(9.8)   | 7<br>(8.0)   | 3<br>(3.9)   | 7<br>(9.3)   | 12<br>(12.9) |
| Nausea                                                              | 230<br>(19.2) | 25<br>(22.1) | 17<br>(13.3) | 24<br>(19.7) | 21<br>(18.4) | 22<br>(21.8) | 10<br>(10.6) | 24<br>(23.3) | 20<br>(21.7) | 21<br>(24.1) | 12<br>(15.6) | 15<br>(20.0) | 19<br>(20.4) |
| Diarrhoea                                                           | 160<br>(13.3) | 16<br>(14.2) | 14<br>(10.9) | 22<br>(18.0) | 20<br>(17.5) | 18<br>(17.8) | 4<br>(4.3)   | 11<br>(10.7) | 18<br>(19.6) | 9<br>(10.3)  | 5<br>(6.5)   | 8<br>(10.7)  | 15<br>(16.1) |
| Hypoglycaemia (severe/BG-confirmed)                                 | 15<br>(1.3)   | 0            | 1<br>(0.8)   | 2<br>(1.6)   | 2<br>(1.8)   | 0            | 0            | 2<br>(1.9)   | 2<br>(2.2)   | 2<br>(2.3)   | 2<br>(2.6)   | 1<br>(1.3)   | 1<br>(1.1)   |

Data are presented as number and proportion in percent of subjects with adverse events. Hypoglycaemia was defined as an episode that was severe (according to the American Diabetes Association classification) or BG-confirmed (plasma glucose value <56 mg/dL [3.1 mmol/L]) with symptoms consistent with hypoglycaemia. AE: adverse event; BG: blood glucose; Dula: dulaglutide; n: number of subjects randomised and exposed to at least one dose of trial product as treated (safety analysis set); Sema: semaglutide.

**Supplementary Table 9. Adverse events by baseline HbA<sub>1c</sub> subgroups**

| n (%)                                                               | All subjects  | ≤7.5% (≤58 mmol/mol) |              |              |              | >7.5–8.5% (>58–69 mmol/mol) |              |              |              | >8.5% (>69 mmol/mol) |              |              |              |
|---------------------------------------------------------------------|---------------|----------------------|--------------|--------------|--------------|-----------------------------|--------------|--------------|--------------|----------------------|--------------|--------------|--------------|
|                                                                     |               | Sema 0.5 mg          | Dula 0.75 mg | Sema 1.0 mg  | Dula 1.5 mg  | Sema 0.5 mg                 | Dula 0.75 mg | Sema 1.0 mg  | Dula 1.5 mg  | Sema 0.5 mg          | Dula 0.75 mg | Sema 1.0 mg  | Dula 1.5 mg  |
|                                                                     | <b>1,199</b>  | <b>74</b>            | <b>94</b>    | <b>83</b>    | <b>84</b>    | <b>120</b>                  | <b>105</b>   | <b>124</b>   | <b>120</b>   | <b>107</b>           | <b>100</b>   | <b>93</b>    | <b>95</b>    |
| AEs                                                                 | 818<br>(68.2) | 51<br>(68.9)         | 62<br>(66.0) | 57<br>(68.7) | 66<br>(78.6) | 80<br>(66.7)                | 65<br>(61.9) | 83<br>(66.9) | 94<br>(78.3) | 73<br>(68.2)         | 59<br>(59.0) | 67<br>(72.0) | 61<br>(64.2) |
| Serious AEs                                                         | 86<br>(7.2)   | 3<br>(4.1)           | 9<br>(9.6)   | 6<br>(7.2)   | 3<br>(3.6)   | 7<br>(5.8)                  | 8<br>(7.6)   | 9<br>(7.3)   | 7<br>(5.8)   | 7<br>(6.5)           | 7<br>(7.0)   | 8<br>(8.6)   | 12<br>(12.6) |
| AEs leading to premature treatment discontinuation                  | 88<br>(7.3)   | 6<br>(8.1)           | 5<br>(5.3)   | 8<br>(9.6)   | 11<br>(13.1) | 11<br>(9.2)                 | 5<br>(4.8)   | 12<br>(9.7)  | 4<br>(3.3)   | 7<br>(6.5)           | 4<br>(4.0)   | 9<br>(9.7)   | 5<br>(5.3)   |
| Gastrointestinal AEs leading to premature treatment discontinuation | 54<br>(4.5)   | 5<br>(6.8)           | 2<br>(2.1)   | 6<br>(7.2)   | 9<br>(10.7)  | 6<br>(5.0)                  | 2<br>(1.9)   | 8<br>(6.5)   | 1<br>(0.8)   | 5<br>(4.7)           | 2<br>(2.0)   | 4<br>(4.3)   | 4<br>(4.2)   |
| Gastrointestinal AEs                                                | 505<br>(42.1) | 33<br>(44.6)         | 32<br>(34.0) | 38<br>(45.8) | 50<br>(59.5) | 52<br>(43.3)                | 40<br>(38.1) | 53<br>(42.7) | 55<br>(45.8) | 44<br>(41.1)         | 28<br>(28.0) | 42<br>(45.2) | 38<br>(40.0) |
| Vomiting                                                            | 103<br>(8.6)  | 7<br>(9.5)           | 5<br>(5.3)   | 8<br>(9.6)   | 7<br>(8.3)   | 14<br>(11.7)                | 2<br>(1.9)   | 14<br>(11.3) | 11<br>(9.2)  | 10<br>(9.3)          | 5<br>(5.0)   | 9<br>(9.7)   | 11<br>(11.6) |
| Nausea                                                              | 230<br>(19.2) | 16<br>(21.6)         | 11<br>(11.7) | 16<br>(19.3) | 19<br>(22.6) | 28<br>(23.3)                | 14<br>(13.3) | 28<br>(22.6) | 22<br>(18.3) | 24<br>(22.4)         | 14<br>(14.0) | 19<br>(20.4) | 19<br>(20.0) |
| Diarrhoea                                                           | 160<br>(13.3) | 12<br>(16.2)         | 6<br>(6.4)   | 14<br>(16.9) | 25<br>(29.8) | 20<br>(16.7)                | 11<br>(10.5) | 17<br>(13.7) | 17<br>(14.2) | 11<br>(10.3)         | 6<br>(6.0)   | 10<br>(10.8) | 11<br>(11.6) |
| Hypoglycaemia (severe/BG-confirmed)                                 | 15<br>(1.3)   | 0                    | 1<br>(1.1)   | 2<br>(2.4)   | 1<br>(1.2)   | 2<br>(1.7)                  | 1<br>(1.0)   | 1<br>(0.8)   | 2<br>(1.7)   | 0                    | 1<br>(1.0)   | 2<br>(2.2)   | 2<br>(2.1)   |

Data are presented as number and proportion in percent of subjects with adverse events. Hypoglycaemia was defined as an episode that was severe (according to the American Diabetes Association classification) or BG-confirmed (plasma glucose value <56 mg/dL [3.1 mmol/L]) with symptoms consistent with hypoglycaemia. AE: adverse event; BG: blood glucose; Dula: dulaglutide; n: number of subjects randomised and exposed to at least one dose of trial product as treated (safety analysis set); Sema: semaglutide.

**Supplementary Table 10. Adverse events by baseline BMI**

| n (%)                                                               | All subjects  | <30 kg/m <sup>2</sup> |              |              |              | 30–<35 kg/m <sup>2</sup> |              |              |              | ≥35 kg/m <sup>2</sup> |              |              |              |
|---------------------------------------------------------------------|---------------|-----------------------|--------------|--------------|--------------|--------------------------|--------------|--------------|--------------|-----------------------|--------------|--------------|--------------|
|                                                                     |               | Sema 0.5 mg           | Dula 0.75 mg | Sema 1.0 mg  | Dula 1.5 mg  | Sema 0.5 mg              | Dula 0.75 mg | Sema 1.0 mg  | Dula 1.5 mg  | Sema 0.5 mg           | Dula 0.75 mg | Sema 1.0 mg  | Dula 1.5 mg  |
|                                                                     | <b>1,199</b>  | <b>99</b>             | <b>100</b>   | <b>91</b>    | <b>109</b>   | <b>90</b>                | <b>86</b>    | <b>105</b>   | <b>81</b>    | <b>112</b>            | <b>113</b>   | <b>104</b>   | <b>108</b>   |
| AEs                                                                 | 818<br>(68.2) | 65<br>(65.7)          | 60<br>(60.0) | 65<br>(71.4) | 84<br>(77.1) | 60<br>(66.7)             | 54<br>(62.8) | 66<br>(62.9) | 65<br>(80.2) | 79<br>(70.5)          | 72<br>(63.7) | 76<br>(73.1) | 71<br>(65.7) |
| Serious AEs                                                         | 86<br>(7.2)   | 4<br>(4.0)            | 4<br>(4.0)   | 5<br>(5.5)   | 4<br>(3.7)   | 6<br>(6.7)               | 6<br>(7.0)   | 5<br>(4.8)   | 12<br>(14.8) | 7<br>(6.3)            | 14<br>(12.4) | 13<br>(12.5) | 6<br>(5.6)   |
| AEs leading to premature treatment discontinuation                  | 87<br>(7.3)   | 12<br>(12.1)          | 8<br>(8.0)   | 12<br>(13.2) | 16<br>(14.7) | 8<br>(8.9)               | 5<br>(5.8)   | 8<br>(7.6)   | 2<br>(2.5)   | 4<br>(3.6)            | 1<br>(0.9)   | 9<br>(8.7)   | 2<br>(1.9)   |
| Gastrointestinal AEs leading to premature treatment discontinuation | 54<br>(4.5)   | 9<br>(9.1)            | 4<br>(4.0)   | 9<br>(9.9)   | 11<br>(10.1) | 5<br>(5.6)               | 2<br>(2.3)   | 5<br>(4.8)   | 2<br>(2.5)   | 2<br>(1.8)            | 0            | 4<br>(3.8)   | 1<br>(0.9)   |
| Gastrointestinal AEs                                                | 505<br>(42.1) | 48<br>(48.5)          | 32<br>(32.0) | 44<br>(48.4) | 59<br>(54.1) | 39<br>(43.3)             | 27<br>(31.4) | 44<br>(41.9) | 41<br>(50.6) | 42<br>(37.5)          | 41<br>(36.3) | 45<br>(43.3) | 42<br>(38.9) |
| Vomiting                                                            | 103<br>(8.6)  | 16<br>(16.2)          | 5<br>(5.0)   | 11<br>(12.1) | 15<br>(13.8) | 6<br>(6.7)               | 3<br>(3.5)   | 12<br>(11.4) | 4<br>(4.9)   | 9<br>(8.0)            | 4<br>(3.5)   | 8<br>(7.7)   | 10<br>(9.3)  |
| Nausea                                                              | 230<br>(19.2) | 25<br>(25.3)          | 9<br>(9.0)   | 19<br>(20.9) | 24<br>(22.0) | 21<br>(23.3)             | 11<br>(12.8) | 24<br>(22.9) | 19<br>(23.5) | 22<br>(19.6)          | 19<br>(16.8) | 20<br>(19.2) | 17<br>(15.7) |
| Diarrhoea                                                           | 160<br>(13.3) | 18<br>(18.2)          | 6<br>(6.0)   | 14<br>(15.4) | 28<br>(25.7) | 13<br>(14.4)             | 9<br>(10.5)  | 14<br>(13.3) | 14<br>(17.3) | 12<br>(10.7)          | 8<br>(7.1)   | 13<br>(12.5) | 10<br>(9.3)  |
| Hypoglycaemia (severe/BG-confirmed)                                 | 15<br>(1.3)   | 0                     | 1<br>(1.0)   | 0            | 3<br>(2.8)   | 0                        | 1<br>(1.2)   | 2<br>(1.9)   | 0            | 2<br>(1.8)            | 1<br>(0.9)   | 3<br>(2.9)   | 2<br>(1.9)   |

Data are presented as number and proportion (%) in percent of subjects with adverse events. Hypoglycaemia was defined as an episode that was severe (according to the American Diabetes Association classification) or BG-confirmed (plasma glucose value <56 mg/dL [3.1 mmol/L]) with symptoms consistent with hypoglycaemia. AE: adverse event; BG: blood glucose; BMI: body mass index; Dula: dulaglutide; n: number of subjects randomised and exposed to at least one dose of trial product as treated (safety analysis set); Sema: semaglutide.



**SUPPLEMENTARY SECTION VI: RESULTS IN SUBJECTS WITH BMI <25 kg/m<sup>2</sup>**

For peer review only

1  
2  
3  
4  
5  
6  
7  
8  
9  
10  
11  
12  
13  
14  
15  
16  
17  
18  
19  
20  
21  
22  
23  
24  
25  
26  
27  
28  
29  
30  
31  
32  
33  
34  
35  
36  
37  
38  
39  
40  
41  
42  
43  
44  
45  
46  
47

**Supplementary Figure 6. Change in HbA<sub>1c</sub> (A) and body weight (B) from baseline to week 40 and the proportion of subjects achieving HbA<sub>1c</sub> <7.0% (53 mmol/mol; C), HbA<sub>1c</sub> ≤6.5% (48 mmol/mol; D), weight loss ≥5% (E) and weight loss ≥10% (F) in subjects with BMI <25 kg/m<sup>2</sup> at baseline**

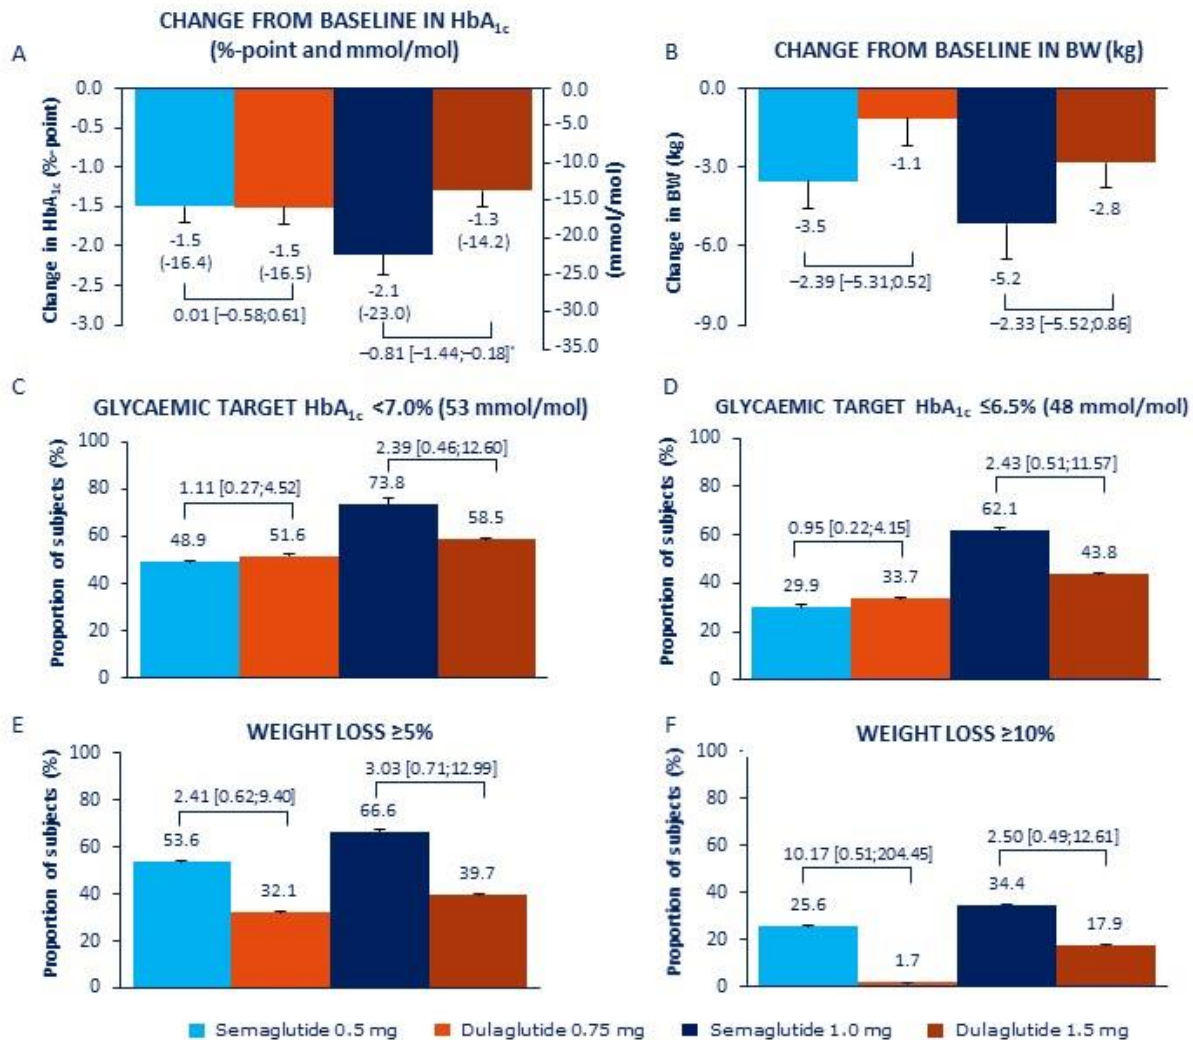

\*p<0.05. Values are estimated means (A, B), estimated proportions (C–F), ETDs [95% CIs] (A, B) or ORs [95% CIs] (C–F) from ANCOVAs with multiple imputations using ‘on-treatment without rescue medication’ data from all randomised subjects exposed to at least one dose of trial product as randomised (full analysis set). ANCOVA analyses were controlled for baseline HbA<sub>1c</sub> and interaction between randomised treatment and subgroup. ANCOVA: analysis of covariance; BMI: body mass index, BW: body weight; CI: confidence interval; ETD: estimated treatment difference; HbA<sub>1c</sub>: glycated haemoglobin; OR: odds ratio.

**Supplementary Figure 7. Change in body weight (%) from baseline to week 40 in subjects with BMI <25 kg/m<sup>2</sup> at baseline**

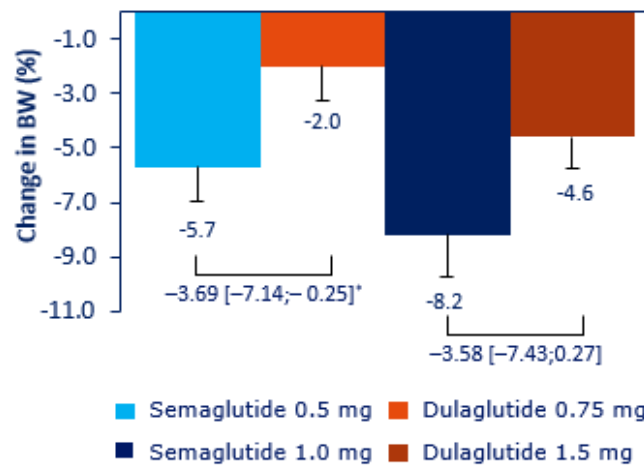

\*p<0.05. Values are estimated means from ANCOVAs with multiple imputations using 'on-treatment without rescue medication' data from all randomised subjects exposed to at least one dose of trial product as randomised (full analysis set). ANCOVAs were controlled for baseline HbA<sub>1c</sub> and interaction between randomised treatment and subgroup. ANCOVA: analysis of covariance; BMI: body mass index; BW: body weight; CI: confidence interval; ETD: estimated treatment difference.

**Supplementary Table 11. Adverse events in subjects with BMI <25 kg/m<sup>2</sup> at baseline**

| n (%)                                                               | All subjects | Sema 0.5 mg | Dula 0.75 mg | Sema 1.0 mg | Dula 1.5 mg |
|---------------------------------------------------------------------|--------------|-------------|--------------|-------------|-------------|
|                                                                     | <b>1,199</b> | <b>24</b>   | <b>19</b>    | <b>16</b>   | <b>28</b>   |
| AEs                                                                 | 818 (68.2)   | 18 (75.0)   | 14 (73.7)    | 12 (75.0)   | 23 (82.1)   |
| Serious AEs                                                         | 86 (7.2)     | 1 (4.2)     | 1 (5.3)      | 2 (12.5)    | 2 (7.1)     |
| AEs leading to premature treatment discontinuation                  | 87 (7.3)     | 5 (20.8)    | 2 (10.5)     | 4 (25.0)    | 6 (21.4)    |
| Gastrointestinal AEs leading to premature treatment discontinuation | 54 (4.5)     | 4 (16.7)    | 0            | 2 (12.5)    | 2 (7.1)     |
| Gastrointestinal AEs                                                | 505 (42.1)   | 14 (58.3)   | 6 (31.6)     | 10 (62.5)   | 17 (60.7)   |
| Vomiting                                                            | 103 (8.6)    | 6 (25.0)    | 1 (5.3)      | 2 (12.5)    | 3 (10.7)    |
| Nausea                                                              | 230 (19.2)   | 6 (25.0)    | 1 (5.3)      | 4 (25.0)    | 6 (21.4)    |
| Diarrhoea                                                           | 160 (13.3)   | 5 (20.8)    | 3 (15.8)     | 3 (18.8)    | 7 (25.0)    |
| Hypoglycaemia (severe/BG-confirmed)                                 | 15 (1.3)     | 0           | 1 (5.3)      | 0           | 1 (3.6)     |

Data are presented as number and proportion in percent of subjects with adverse events. Hypoglycaemia was defined as an episode that was severe (according to the American Diabetes Association classification) or BG-confirmed (plasma glucose value <56 mg/dL [3.1 mmol/L]) with symptoms consistent with hypoglycaemia. AE: adverse event; BG: blood glucose; BMI: body mass index; Dula: dulaglutide; n: number of subjects randomised and exposed to at least one dose of trial product as treated (safety analysis set); Sema: semaglutide.
